# Supplementary material for: LC/MS Q-TOF Metabolomic Investigation of Amino Acids and Dipeptides in Pleurotus ostreatus Grown on Different Substrates
Source: PubMed Central journal article supplement (PMC9413224; doi:10.1021/acs.jafc.2c04197), 2022-08-09
Supplement: jf2c04197_si_001.pdf [file jf2c04197_si_001.pdf]

**LC/MS Q-TOF metabolomic investigation of amino acids and dipeptides in *Pleurotus ostreatus* grown on different substrates**

Roberto Maria Pellegrino,<sup>a,†</sup> Francesca Blasi,<sup>b,†</sup> Paola Angelini,<sup>a</sup> Federica Ianni,<sup>b,\*</sup> Husam B.R. Alabed,<sup>a</sup> Carla Emiliani,<sup>a</sup> Roberto Venanzoni,<sup>a</sup> and Lina Cossignani,<sup>b,c</sup>

<sup>a</sup> Department of Chemistry, Biology and Biotechnology, University of Perugia, 06122 Perugia, Italy

<sup>b</sup> Department of Pharmaceutical Sciences, University of Perugia, 06126 Perugia, Italy

<sup>c</sup> Center for Perinatal and Reproductive Medicine, Santa Maria della Misericordia University Hospital, University of Perugia, Sant'Andrea delle Fratte, 06132 Perugia, Italy

<sup>†</sup> These authors have equally contributed to this work.

**\*Corresponding Author:**

Ianni Federica

Tel.: +075 5857955

E-mail address: federica.ianni@unipg.it

**Table 1S.** Overview of the identified metabolites by LC/MS Q-TOF analysis, annotated with NIST 2020 tandem mass library.

| Rt (min) | m/z       | Metabolite name | Adduct type                | Reference m/z | Delta ppm | Formula    | INCHIKEY                     | Total score | MS1 isotopic spectrum                                 | MS/MS spectrum                                                                                                                                                                                                                |
|----------|-----------|-----------------|----------------------------|---------------|-----------|------------|------------------------------|-------------|-------------------------------------------------------|-------------------------------------------------------------------------------------------------------------------------------------------------------------------------------------------------------------------------------|
| 8.805    | 154.08569 | Vildagliptin    | [M+H-C10H14O] <sup>+</sup> | 154.0975      | 76.64     | C17H25N3O2 | SYOKIDBDQMKNQ-XWTIBIIYSA-N   | 63.6        | 154.09229:14038<br>155.09564:942<br>156.099:0         | 97.08337:160 97.11013:50<br>154.14542:73                                                                                                                                                                                      |
| 9.054    | 217.15691 | Val-Val         | [M+H] <sup>+</sup>         | 217.15469     | 10.22     | C10H20N2O3 | KRNYOVHEKOBTEF-UHFFFAOYSA-N  | 66.2        | 217.15691:326010<br>218.16026:43528<br>219.16362:5098 | 42.03619:98<br>55.05472:4280<br>55.11691:151<br>56.05523:234 56.09322:56<br>57.05893:216<br>72.08189:7784<br>72.15614:250 72.185:157<br>72.37117:54 73.0854:408                                                               |
| 13.761   | 304.15823 | Val-Trp         | [M+H] <sup>+</sup>         | 304.16559     | 24.20     | C16H21N3O3 | LZDNBBYBDGBADK-KGLIPLIRSA-N  | 60.8        | 304.16354:33472<br>305.16689:8121<br>306.17025:1211   | 44.04936:55 55.05224:240<br>56.04889:134 57.05977:78<br>60.085:63 72.08155:1437<br>72.138:96 72.19753:56<br>130.06502:144<br>144.07237:121<br>145.08199:105<br>146.0578:478<br>188.06801:552<br>189.07874:173<br>198.88312:77 |
| 4.121    | 219.13571 | Val-Thr         | [M+H] <sup>+</sup>         | 219.1339      | 8.26      | C9H18N2O4  | GVRKWABULJAON-N-QYNIQEEDSA-N | 68.3        | 219.13304:62807<br>220.13639:7929<br>221.13975:920    | 47.0707:95 53.04128:124<br>55.05686:885<br>56.05951:112<br>57.05746:131<br>72.08139:2303<br>72.15357:114<br>73.08999:144 74.06578:70<br>84.05569:54 118.91647:67                                                              |
| 3.417    | 205.12074 | Val-Ser         | [M+H] <sup>+</sup>         | 205.1183      | 11.90     | C8H16N2O4  | STTYIMSDIYISRG-WDSKDSINSA-N  | 66.7        | 205.12074:20394<br>206.12409:2648<br>207.12745:0      | 55.05237:694 56.05848:74<br>60.04446:53 72.07834:464                                                                                                                                                                          |

|        |           |         |                    |           |       |             |                                 |      |                                                      |                                                                                                                                                                                                                                                                                                                                                                         |
|--------|-----------|---------|--------------------|-----------|-------|-------------|---------------------------------|------|------------------------------------------------------|-------------------------------------------------------------------------------------------------------------------------------------------------------------------------------------------------------------------------------------------------------------------------------------------------------------------------------------------------------------------------|
| 8.524  | 215.14049 | Val-Pro | [M+H] <sup>+</sup> | 215.13901 | 6.88  | C10H18N2O3  | GIAZPLMMQOERP<br>N-YUMQZZPRSA-N | 69.3 | 215.14049:351861<br>216.14384:42653<br>217.1472:4117 | 44.04496:124<br>55.05545:2988<br>55.12062:96 56.05722:226<br>56.08465:67 57.05662:122<br>70.06538:5686<br>70.1409:202 70.16547:83<br>71.06705:476<br>72.08176:4790<br>72.15569:208 72.18397:92<br>72.36788:50 73.07926:86<br>91.05276:91<br>116.07014:1286<br>116.4015:59 117.07:69                                                                                     |
| 13.369 | 265.15295 | Val-Phe | [M+H] <sup>+</sup> | 265.15469 | 6.56  | C14H20N2O3  | GJNDXQBALKCYSZ-<br>NEPJUHUSA-N  | 62.6 | 265.15085:36094<br>266.1542:7523<br>267.15756:7680   | 55.05212:400 70.05971:81<br>72.07896:1547<br>108.04417:59 118.9118:62<br>120.07647:175<br>121.08079:103<br>136.91835:75                                                                                                                                                                                                                                                 |
| 9.804  | 249.12721 | Val-Met | [M+H] <sup>+</sup> | 249.12669 | 2.09  | C10H20N2O3S | YSGSDAIMSCVPHG<br>-JGVFFNPUSA-N | 63.5 | 249.12761:11819<br>250.13096:1782<br>251.13432:796   | 55.05395:185 56.04829:95<br>72.0797:343 96.07786:56                                                                                                                                                                                                                                                                                                                     |
| 9.648  | 246.18425 | Val-Lys | [M+H] <sup>+</sup> | 246.1812  | 12.39 | C11H23N3O3  | JKHXYJKMNSSFFL-<br>DTWKUNHWSA-N | 68.3 | 246.18279:146309<br>247.18614:21216<br>248.1895:2316 | 55.05557:1514 56.05:121<br>57.05569:123 67.0548:51<br>69.0692:90 72.08141:3635<br>72.1544:165 73.08379:115<br>74.08187:56<br>84.08086:5580<br>84.15781:268 84.21529:71<br>85.08267:617 85.12876:77<br>85.26779:53 87.05257:128<br>112.07801:52 113.104:75<br>117.06268:60<br>121.08742:93<br>129.10617:107<br>130.08661:828<br>130.14726:75<br>131.09532:99 147.1113:73 |

|        |           |         |                    |           |       |            |                                 |      |                                                       |                                                                                                                                                                                                                                  |
|--------|-----------|---------|--------------------|-----------|-------|------------|---------------------------------|------|-------------------------------------------------------|----------------------------------------------------------------------------------------------------------------------------------------------------------------------------------------------------------------------------------|
| 12.186 | 231.17436 | Val-Ile | [M+H] <sup>+</sup> | 231.1703  | 17.56 | C11H22N2O3 | PNVLWFYAPWAQ<br>MU-DJLDEBSA-N   | 66.5 | 231.17392:131718<br>232.17727:20998<br>233.18063:2329 | 41.04037:76<br>55.05578:2082<br>56.05415:254<br>57.05513:139 69.07134:78<br>72.08244:4137<br>72.15668:135 72.26163:64<br>72.53194:68 73.08437:527<br>86.09599:387<br>118.92731:53<br>136.92125:55                                |
| 10.073 | 255.14528 | Val-His | [M+H] <sup>+</sup> | 255.1452  | 0.31  | C11H18N4O3 | BNQVUHQWZGTIB<br>X-RKDXNWHRSA-N | 66.9 | 255.14914:29542<br>256.15249:3525<br>257.15585:775    | 41.0406:52 55.01808:70<br>55.05617:224<br>72.07988:367<br>83.06108:184 85.02464:57<br>93.04691:87 95.0605:105<br>105.07163:74<br>110.07085:1594<br>110.1609:72 111.06829:62<br>156.07626:86                                      |
| 5.3    | 247.13176 | Val-Glu | [M+H] <sup>+</sup> | 247.1288  | 11.98 | C10H18N2O5 | UPJONISHZRADBH-<br>POYBYMJQSA-N | 67.2 | 247.13129:52441<br>248.13464:5815<br>249.138:1115     | 41.03763:159<br>55.05574:851<br>55.09005:105 56.05739:85<br>57.06269:96<br>72.08173:1198<br>72.15641:57 73.08894:86<br>84.04134:399<br>85.04811:108 88.0778:52<br>102.06631:109 117.077:59                                       |
| 4.147  | 246.14642 | Val-Gln | [M+H] <sup>+</sup> | 246.14481 | 6.54  | C10H19N3O4 | XXDVDTMEVBYP<br>K-POYBYMJQSA-N  | 68.5 | 246.14642:129064<br>247.14977:17864<br>248.15313:2068 | 41.03913:118<br>55.05502:1278<br>55.12315:52 56.0538:183<br>57.05649:94<br>72.08181:2715<br>72.14297:151 72.30332:54<br>73.08337:88<br>84.04571:2539<br>84.12489:106 84.18593:53<br>86.0498:191<br>101.06682:197<br>102.05256:61 |

130.05048:1092  
158.92152:63

|        |           |         |                    |           |       |            |                                 |      |                                                      |                                                                                                                                                                                                                                                                                                             |
|--------|-----------|---------|--------------------|-----------|-------|------------|---------------------------------|------|------------------------------------------------------|-------------------------------------------------------------------------------------------------------------------------------------------------------------------------------------------------------------------------------------------------------------------------------------------------------------|
| 3.886  | 233.11707 | Val-Asp | [M+H] <sup>+</sup> | 233.1132  | 16.60 | C9H16N2O5  | OBTCMSPFOITUIJ-<br>CAHLUQPWSA-N | 66.5 | 233.11591:22234<br>234.11926:2503<br>235.12262:0     | 44.04722:109<br>55.05528:411 55.08739:56<br>56.0477:56 57.05824:98<br>72.08285:653 73.08289:57                                                                                                                                                                                                              |
| 2.977  | 232.13008 | Val-Asn | [M+H] <sup>+</sup> | 232.1292  | 3.79  | C9H17N3O4  | WITCOKQIPFWQQ<br>D-CAHLUQPWSA-N | 65.8 | 232.13008:50106<br>233.13343:9860<br>234.13679:1564  | 44.05079:111<br>55.05584:612 57.0575:67<br>60.04285:86 68.04704:149<br>70.06025:52<br>72.08072:1666<br>72.13362:87 72.15714:70<br>74.02426:439<br>87.05406:120<br>116.02893:145<br>136.92912:55                                                                                                             |
| 11.191 | 274.19107 | Val-Arg | [M+H] <sup>+</sup> | 274.18741 | 13.35 | C11H23N5O3 | IBIDRSSEHFLGSD-<br>JGVFFNPUSA-N | 65.2 | 274.18762:88616<br>275.19097:13222<br>276.19433:1625 | 42.97935:52 55.0568:350<br>60.05543:319<br>70.06611:2041<br>70.14102:96<br>72.08114:2020<br>72.15565:78 73.08408:184<br>85.0661:73 86.09454:54<br>87.0819:69 99.09091:84<br>110.08666:66<br>112.09447:124<br>113.07706:79<br>113.14589:71<br>114.08326:77<br>115.08894:96<br>116.07461:384<br>118.91936:167 |

|        |           |         |                    |           |       |            |                                 |      |                                                      |                                                                                                                                                                                                                                        |
|--------|-----------|---------|--------------------|-----------|-------|------------|---------------------------------|------|------------------------------------------------------|----------------------------------------------------------------------------------------------------------------------------------------------------------------------------------------------------------------------------------------|
|        |           |         |                    |           |       |            |                                 |      |                                                      | 130.09906:128                                                                                                                                                                                                                          |
|        |           |         |                    |           |       |            |                                 |      |                                                      | 136.93228:168                                                                                                                                                                                                                          |
|        |           |         |                    |           |       |            |                                 |      |                                                      | 140.07697:63                                                                                                                                                                                                                           |
|        |           |         |                    |           |       |            |                                 |      |                                                      | 157.10464:90                                                                                                                                                                                                                           |
|        |           |         |                    |           |       |            |                                 |      |                                                      | 158.08806:205                                                                                                                                                                                                                          |
|        |           |         |                    |           |       |            |                                 |      |                                                      | 175.11642:243                                                                                                                                                                                                                          |
|        |           |         |                    |           |       |            |                                 |      |                                                      | 176.13057:101                                                                                                                                                                                                                          |
|        |           |         |                    |           |       |            |                                 |      |                                                      | 239.14386:64                                                                                                                                                                                                                           |
|        |           |         |                    |           |       |            |                                 |      |                                                      | 261.10858:78                                                                                                                                                                                                                           |
| 5.445  | 189.12323 | Val-Ala | [M+H] <sup>+</sup> | 189.1234  | 0.90  | C8H16N2O3  | HSRXSKHRSXRCFC-<br>WDSKDSINSA-N | 70.1 | 189.1255:146031<br>190.12885:16965<br>191.13221:1784 | 53.03786:125<br>55.05521:3528<br>55.1198:100 55.17471:72<br>56.05784:410<br>57.05569:361 58.06755:66<br>72.08119:3584<br>72.15427:84 72.18786:70<br>72.2274:70 73.08307:209<br>84.08081:67                                             |
| 1.122  | 61.04026  | Urea    | [M+H] <sup>+</sup> | 61.0396   | 10.81 | CH4N2O     | XSQUKJJFZCRTK-<br>UHFFFAOYSA-N  | 66   | 61.03996:2933<br>62.04331:0<br>63.04667:0            | 43.00614:72 43.02899:218<br>44.01361:5326<br>44.09539:115 45.01363:60                                                                                                                                                                  |
| 10.413 | 279.13483 | Tyr-Pro | [M+H] <sup>+</sup> | 279.13391 | 3.30  | C14H18N2O4 | VNYDHJARLHNEGA<br>-RYUDHWBXSAN  | 68.7 | 279.13617:52539<br>280.13952:9643<br>281.14288:1658  | 70.0665:1432 70.14153:61<br>71.06332:53 91.05454:885<br>92.05972:104<br>109.06656:82 114.0542:53<br>116.06789:359<br>118.06886:54<br>119.04931:286<br>121.0583:136<br>136.07396:1019<br>137.07796:100<br>142.95074:69<br>147.04169:109 |
| 7.074  | 311.12723 | Tyr-Glu | [M+H] <sup>+</sup> | 311.12381 | 10.99 | C14H18N2O6 | PDSLRCZINIMU-<br>QWRGUYRKSAN    | 60.7 | 311.12643:19162<br>312.12978:3794<br>313.13314:806   | 45.03059:60 91.05808:394<br>92.05885:77 104.10293:51<br>110.06616:53<br>119.05165:356<br>130.04631:76<br>136.07639:386                                                                                                                 |

137.07196:101  
150.0415:65

|        |           |             |                                         |           |      |                                                |                                 |      |                                                     |                                                                                                                                                                                                                                                                                                                                                                                                                                                                                                                                          |
|--------|-----------|-------------|-----------------------------------------|-----------|------|------------------------------------------------|---------------------------------|------|-----------------------------------------------------|------------------------------------------------------------------------------------------------------------------------------------------------------------------------------------------------------------------------------------------------------------------------------------------------------------------------------------------------------------------------------------------------------------------------------------------------------------------------------------------------------------------------------------------|
| 12.533 | 161.10872 | Tryptamine  | [M+H] <sup>+</sup>                      | 161.1073  | 8.81 | C <sub>10</sub> H <sub>12</sub> N <sub>2</sub> | APJYDQYYACXCRM<br>-UHFFFAOYSA-N | 70.2 | 161.10654:97640<br>162.10989:13494<br>163.11325:843 | 51.02283:193 63.0179:56<br>65.0395:230 66.03239:116<br>77.04113:298 78.0489:112<br>89.03737:350 90.03807:56<br>91.05362:1418<br>91.14342:58 92.06156:175<br>93.05669:132<br>102.04993:98<br>103.05406:169<br>104.05883:108<br>115.05383:2010<br>115.14814:73<br>116.05782:545<br>117.06538:1801<br>118.07052:285<br>119.07544:77<br>127.0546:1298<br>127.15098:82<br>128.05225:411<br>129.05881:187<br>130.05742:59<br>132.08168:74<br>133.09245:92<br>142.06531:203<br>143.07245:1510<br>143.18126:68<br>144.07655:1055<br>145.0925:220 |
| 10.536 | 149.06097 | Tropic acid | [M+H-<br>H <sub>2</sub> O] <sup>+</sup> | 149.05969 | 8.59 | C <sub>9</sub> H <sub>10</sub> O <sub>3</sub>  | JACRWUWPXAESP<br>B-UHFFFAOYSA-N | 66.4 | 149.05922:19811<br>150.06257:2554<br>151.06593:0    | 51.02534:120<br>77.04131:1096<br>77.11346:68 79.05754:261<br>80.05895:135 91.05556:52<br>92.05896:92 102.05476:74<br>103.05954:276<br>104.05242:69                                                                                                                                                                                                                                                                                                                                                                                       |

|        |           |                     |                 |           |      |            |                                 |      |                                                     |                                                                                                                                                                                                                                                                      |
|--------|-----------|---------------------|-----------------|-----------|------|------------|---------------------------------|------|-----------------------------------------------------|----------------------------------------------------------------------------------------------------------------------------------------------------------------------------------------------------------------------------------------------------------------------|
| 10.535 | 131.05034 | trans-Cinnamic acid | [M+H-<br>H2O]+  | 131.0491  | 9.46 | C9H8O2     | WBYWAXJHAXSJNI<br>-VOTSOKGWSA-N | 66.4 | 131.05005:17597<br>132.0534:2012<br>133.05676:0     | 77.04008:418<br>103.05578:74                                                                                                                                                                                                                                         |
| 1.364  | 139.00394 | trans-Aconitic acid | [M+H-<br>2H2O]+ | 139.00259 | 9.71 | C6H6O6     | GTZCVFVGUGFEM<br>E-HNQUOIGGSA-N | 64.1 | 139.00166:2288<br>140.00501:627<br>141.00837:0      | 68.99852:203 69.03954:82                                                                                                                                                                                                                                             |
| 13.16  | 306.14648 | Thr-Trp             | [M+H]+          | 306.14481 | 5.45 | C15H19N3O4 | KAFKKRJQHOECG<br>W-WQHBLIJGSA-N | 63.2 | 306.14221:30313<br>307.14556:6220<br>308.14892:977  | 56.04949:148<br>74.06071:279 75.05736:52<br>85.03267:85 118.0671:96<br>120.07237:138<br>136.93103:87<br>144.07628:125<br>146.05988:322<br>159.09396:89 170.0499:74<br>188.06387:459                                                                                  |
| 2.157  | 221.11325 | Thr-Thr             | [M+H]+          | 221.1132  | 0.23 | C8H16N2O5  | DSGIVWSDDRDJIO-<br>KAZBKCHUSA-N | 62   | 221.11568:23012<br>222.11903:2456<br>223.12239:0    | 56.04871:290<br>58.06362:189 74.0594:474<br>84.04565:128                                                                                                                                                                                                             |
| 1.726  | 207.09567 | Thr-Ser             | [M+H]+          | 207.0975  | 8.84 | C7H14N2O5  | GXGHLJTHMDII-<br>WISUUJSJSA-N   | 66.4 | 207.09967:17312<br>208.10302:3237<br>209.10638:0    | 56.05029:329<br>57.03868:102<br>60.04561:178<br>74.06038:380                                                                                                                                                                                                         |
| 6.106  | 217.11884 | Thr-Pro             | [M+H]+          | 217.1183  | 2.49 | C9H16N2O4  | QQLYAJSZHIJCTO-<br>VQVTYTSYSA-N | 69.6 | 217.121:176310<br>218.12435:19371<br>219.12771:4459 | 55.05254:93 56.0498:1264<br>56.11044:54 57.03467:397<br>58.06591:112 59.03355:85<br>69.07259:72<br>70.06616:4681<br>70.1393:167 70.21783:62<br>70.23931:70 71.07054:229<br>74.06083:2109<br>74.13419:76 75.05883:63<br>86.09563:108<br>116.07079:661<br>117.06812:68 |
| 6.549  | 248.15962 | Thr-Lys             | [M+H]+          | 248.16051 | 3.59 | C10H21N3O4 | YKRQRPFODDJQTC<br>-GJMOJQLCSA-N | 64.3 | 248.1613:45231<br>249.16465:6275<br>250.16801:679   | 56.04987:130 57.03093:94<br>74.05878:527<br>84.07977:1033<br>85.03062:114 85.08408:75                                                                                                                                                                                |



86.10981:62 131.08189:76  
147.11096:52

|        |           |         |                    |           |       |            |                                  |      |                                                      |                                                                                                                                                                                                                                                                                                                                                                                            |
|--------|-----------|---------|--------------------|-----------|-------|------------|----------------------------------|------|------------------------------------------------------|--------------------------------------------------------------------------------------------------------------------------------------------------------------------------------------------------------------------------------------------------------------------------------------------------------------------------------------------------------------------------------------------|
| 11.294 | 233.15691 | Thr-Leu | [M+H] <sup>+</sup> | 233.1496  | 31.35 | C10H20N2O4 | BQBCIBCLXBKYHW<br>-BIIVOSGPPSA-N | 63.6 | 233.1507:50736<br>234.15405:6074<br>235.15741:1048   | 43.05305:94 56.04869:542<br>56.08965:58 57.03092:181<br>74.0598:1305 75.06843:85<br>86.09901:164 87.09486:56<br>100.11089:51<br>118.91803:241<br>136.92789:96                                                                                                                                                                                                                              |
| 1.94   | 177.08929 | Thr-Gly | [M+H] <sup>+</sup> | 177.08701 | 12.88 | C6H12N2O4  | BIYXEUAFLTAEM-<br>WUJLRWPWSA-N   | 66.1 | 177.08681:14285<br>178.09016:4085<br>179.09352:530   | 54.03273:83 56.04922:540<br>57.03769:102<br>74.06538:210 84.0421:53                                                                                                                                                                                                                                                                                                                        |
| 2.562  | 249.10776 | Thr-Glu | [M+H] <sup>+</sup> | 249.10809 | 1.32  | C9H16N2O6  | BECPPKYKPSRKCP-<br>JCGDXUMPSA-N  | 61.4 | 249.11093:45419<br>250.11428:6703<br>251.11764:1280  | 56.05095:127 57.03691:74<br>60.08488:78 74.06184:179<br>84.04642:156 85.04212:67                                                                                                                                                                                                                                                                                                           |
| 8.18   | 276.15802 | Thr-Arg | [M+H] <sup>+</sup> | 276.1666  | 31.07 | C10H21N5O4 | HYLXOQURIOCKIH-<br>DSYKOEDSSA-N  | 60.9 | 276.16641:84746<br>277.16976:13932<br>278.17312:1914 | 41.03763:92 43.01907:90<br>45.03344:127<br>56.05074:143<br>57.03532:129<br>59.03505:109<br>60.05548:312 69.72964:62<br>70.06722:1247<br>71.06765:318 72.08368:85<br>74.06078:633<br>86.09857:193 87.02829:74<br>88.07616:78 98.06377:165<br>99.02403:80<br>100.05281:188<br>112.08947:235<br>113.07433:75<br>114.11156:63<br>115.09147:84<br>116.07298:288<br>118.07064:81<br>126.06938:69 |

130.05072:52  
 130.09499:77  
 136.92693:122  
 150.09772:132  
 170.10747:51  
 175.1198:274  
 178.09592:61  
 200.91641:69  
 213.13135:62  
 241.13681:60

|       |           |                 |                    |           |       |            |                                 |      |                                                    |                                           |
|-------|-----------|-----------------|--------------------|-----------|-------|------------|---------------------------------|------|----------------------------------------------------|-------------------------------------------|
| 2.564 | 191.10242 | Thr-Ala         | [M+H] <sup>+</sup> | 191.1026  | 0.94  | C7H14N2O4  | VPZKQTYZIVOJDV-<br>LMVFSUKVSA-N | 65.8 | 191.10466:42828<br>192.10801:4755<br>193.11137:510 | 56.04897:195<br>57.03465:102 74.0583:270  |
| 9.422 | 265.11533 | Thiamine cation | [Cat] <sup>+</sup> | 265.11179 | 13.35 | C12H17N4OS | JZRWCGZRTZMZEH<br>-UHFFFAOYSA-N | 60.9 | 265.11063:7219<br>266.11398:1607<br>267.11734:0    | 42.03396:81 81.04653:175<br>122.07275:203 |

|        |           |                           |                    |           |      |         |                                 |      |                                                        |                                                                                                                                                                                                                                                                                                                                                                                                                                                                                                                                                                                                                                                                                                                                                                                                                               |
|--------|-----------|---------------------------|--------------------|-----------|------|---------|---------------------------------|------|--------------------------------------------------------|-------------------------------------------------------------------------------------------------------------------------------------------------------------------------------------------------------------------------------------------------------------------------------------------------------------------------------------------------------------------------------------------------------------------------------------------------------------------------------------------------------------------------------------------------------------------------------------------------------------------------------------------------------------------------------------------------------------------------------------------------------------------------------------------------------------------------------|
| 15.331 | 242.28629 | Tetrabutylammonium cation | [Cat] <sup>+</sup> | 242.28419 | 8.67 | C16H36N | DZLFLBLQUQXAR<br>W-UHFFFAOYSA-N | 70.7 | 242.28629:1571399<br>243.28964:407341<br>244.293:34795 | 41.03912:4805<br>41.09568:181 41.11564:86<br>41.14586:72 42.0428:135<br>44.05042:1426<br>44.11067:86 45.05025:90<br>48.37786:75 55.06042:58<br>57.07045:7173<br>57.13741:255<br>57.17751:127<br>58.0659:14422<br>58.13163:671<br>58.15588:264<br>58.18802:160<br>58.25434:105 58.28602:91<br>58.34351:81 58.38648:62<br>58.44855:91 58.49096:74<br>58.51011:58 59.07082:268<br>67.05479:65 70.06944:58<br>72.08265:1167<br>73.08139:110<br>74.09635:2327<br>74.19257:65 75.09614:146<br>77.03043:53 79.04949:61<br>82.33197:60 84.07515:195<br>84.10123:57 86.09788:712<br>87.09892:69<br>100.11246:41565<br>100.1991:2268<br>100.4014:53<br>100.45583:136<br>100.50109:120<br>100.52877:88<br>100.58514:95<br>100.65312:61<br>100.72276:66<br>100.75869:72<br>101.01625:50<br>101.11611:3255<br>101.27108:79<br>101.34238:57 |
|--------|-----------|---------------------------|--------------------|-----------|------|---------|---------------------------------|------|--------------------------------------------------------|-------------------------------------------------------------------------------------------------------------------------------------------------------------------------------------------------------------------------------------------------------------------------------------------------------------------------------------------------------------------------------------------------------------------------------------------------------------------------------------------------------------------------------------------------------------------------------------------------------------------------------------------------------------------------------------------------------------------------------------------------------------------------------------------------------------------------------|

101.49202:73  
101.61606:55  
101.73919:54  
102.08941:58  
102.11535:164  
102.13728:94  
102.42632:52  
114.12959:69  
128.14235:2641  
128.23721:93  
128.27303:58  
129.14571:200  
30.15834:6047  
130.25897:212  
130.30945:134  
131.16013:883  
131.66562:57  
141.49197:57  
142.15907:42170  
142.2603:2297  
142.42366:206  
142.46945:81  
142.53831:87  
142.66508:119  
142.72699:86  
142.84082:53  
142.88422:58  
142.92023:89  
142.95343:58  
143.04227:87  
143.16068:4699  
143.24734:280  
143.31165:175  
143.34178:149  
143.38406:78  
143.47917:80  
143.65434:60  
144.04536:51  
144.16951:217  
144.53508:53

|        |           |            |                    |           |      |           |                                     |      |                                                       |                                                                                                                   |
|--------|-----------|------------|--------------------|-----------|------|-----------|-------------------------------------|------|-------------------------------------------------------|-------------------------------------------------------------------------------------------------------------------|
|        |           |            |                    |           |      |           |                                     |      |                                                       | 182.14653:56                                                                                                      |
|        |           |            |                    |           |      |           |                                     |      |                                                       | 184.20508:5417                                                                                                    |
|        |           |            |                    |           |      |           |                                     |      |                                                       | 184.32381:186                                                                                                     |
|        |           |            |                    |           |      |           |                                     |      |                                                       | 184.37401:101                                                                                                     |
|        |           |            |                    |           |      |           |                                     |      |                                                       | 184.42596:102                                                                                                     |
|        |           |            |                    |           |      |           |                                     |      |                                                       | 184.49474:76                                                                                                      |
|        |           |            |                    |           |      |           |                                     |      |                                                       | 185.20851:857                                                                                                     |
|        |           |            |                    |           |      |           |                                     |      |                                                       | 185.2843:62                                                                                                       |
|        |           |            |                    |           |      |           |                                     |      |                                                       | 186.22105:8418                                                                                                    |
|        |           |            |                    |           |      |           |                                     |      |                                                       | 186.33763:260                                                                                                     |
|        |           |            |                    |           |      |           |                                     |      |                                                       | 186.38362:162                                                                                                     |
|        |           |            |                    |           |      |           |                                     |      |                                                       | 186.42751:109                                                                                                     |
|        |           |            |                    |           |      |           |                                     |      |                                                       | 186.5197:93 186.6299:116                                                                                          |
|        |           |            |                    |           |      |           |                                     |      |                                                       | 186.71111:66                                                                                                      |
|        |           |            |                    |           |      |           |                                     |      |                                                       | 186.76685:90                                                                                                      |
|        |           |            |                    |           |      |           |                                     |      |                                                       | 187.22357:1766                                                                                                    |
|        |           |            |                    |           |      |           |                                     |      |                                                       | 188.22319:137                                                                                                     |
|        |           |            |                    |           |      |           |                                     |      |                                                       | 242.28435:2407                                                                                                    |
|        |           |            |                    |           |      |           |                                     |      |                                                       | 242.42624:90 242.5002:53                                                                                          |
|        |           |            |                    |           |      |           |                                     |      |                                                       | 242.6337:77                                                                                                       |
| 12.516 | 146.16388 | Spermidine | [M+H] <sup>+</sup> | 146.16521 | 9.10 | C7H19N3   | ATHGHQPFQMSJ<br>Y-UHFFFAOYSA-N      | 61   | 146.16353:776168<br>147.16688:89560<br>148.17024:4043 | 72.08087:714<br>84.08324:164 85.09202:62<br>119.07441:51                                                          |
| 1.873  | 207.09627 | Ser-Thr    | [M+H] <sup>+</sup> | 207.0975  | 5.94 | C7H14N2O5 | LDEBVRIURYMKQS<br>-UOWFLXDJSA-N     | 67.3 | 207.09799:48383<br>208.10134:7586<br>209.1047:901     | 43.05338:53 56.049:304<br>57.0322:84 57.04881:54<br>60.04427:922<br>74.05899:240<br>120.06059:101<br>141.07161:53 |
| 4.204  | 203.10435 | Ser-Pro    | [M+H] <sup>+</sup> | 203.1026  | 8.62 | C8H14N2O4 | WBAXJMCUFIXCNI<br>-WDSKDSINSA-N     | 70   | 203.10435:104445<br>204.1077:12034<br>205.11106:1694  | 43.04036:63<br>60.04646:1443<br>60.11351:62 70.0662:2353<br>70.14169:88 71.06748:122<br>116.0677:326              |
| 5.578  | 234.14391 | Ser-Lys    | [M+H] <sup>+</sup> | 234.14481 | 3.84 | C9H19N3O4 | SBMNPABNWKXN<br>BJ-RQJHMYQMSA-<br>N | 66.8 | 234.14391:31717<br>235.14726:4388<br>236.15062:828    | 42.03696:104 56.04899:53<br>60.04605:355 84.0802:893<br>118.91942:78<br>129.10742:50<br>130.09103:58              |

|        |           |                             |                               |           |       |            |                                 |      |                                                     |                                                                                                                                                                                                   |
|--------|-----------|-----------------------------|-------------------------------|-----------|-------|------------|---------------------------------|------|-----------------------------------------------------|---------------------------------------------------------------------------------------------------------------------------------------------------------------------------------------------------|
| 10.725 | 219.1375  | Ser-Leu                     | [M+H] <sup>+</sup>            | 219.1339  | 16.43 | C9H18N2O4  | NFDYGNFETJVMSE<br>-RQJHMYQMSA-N | 62.7 | 219.13516:55940<br>220.13851:7037<br>221.14187:861  | 42.03057:148 44.0464:95<br>57.03148:62<br>60.04319:1194 71.0677:76<br>86.09913:326 87.09286:87<br>102.94397:73<br>103.05275:95<br>118.91057:81                                                    |
| 9.908  | 219.13617 | Ser-Ile                     | [M+H] <sup>+</sup>            | 219.1339  | 10.36 | C9H18N2O4  | BXLYSRPHVMCOPS<br>-RRKCRQDMSA-N | 63.9 | 219.13118:25087<br>220.13453:3321<br>221.13789:615  | 41.03702:56 42.034:99<br>43.01832:67 45.05048:60<br>57.06129:104<br>60.04466:760<br>69.06982:162<br>86.09914:236<br>118.91747:123                                                                 |
| 2.146  | 235.09152 | Ser-Glu                     | [M+H] <sup>+</sup>            | 235.0925  | 4.17  | C8H14N2O6  | LAFKUZYWNCHOH<br>T-UHNVWZDZSA-N | 64.6 | 235.09152:44107<br>236.09487:6461<br>237.09823:1096 | 42.03139:99 50.09751:69<br>60.0436:1067 60.11332:82<br>61.04029:65 70.06995:66<br>84.04359:819 84.1269:52<br>85.04289:127 85.44175:50<br>98.06739:58<br>102.05518:133<br>109.03665:53 130.0529:69 |
| 1.822  | 90.0554   | Sarcosine                   | [M+H] <sup>+</sup>            | 90.055    | 4.44  | C3H7NO2    | FSYKLYZXJSPZ-<br>UHFFFAOYSA-N   | 63.4 | 90.05695:4476<br>91.0603:0 92.06366:0               | 42.03469:101 43.01567:72<br>44.05026:10527<br>44.10876:389<br>44.12645:147<br>44.15922:116 44.3038:58<br>44.43998:66 44.66281:66<br>44.73191:57 44.99797:747<br>45.05246:300                      |
| 2.066  | 134.02837 | Acetamidomethyl<br>cysteine | [M+H-<br>C2H5NO] <sup>+</sup> | 134.02699 | 10.30 | C6H12N2O3S | QFQYGMNIDGZSG<br>-YFKPBYRVSA-N  | 60.9 | 134.02846:4275<br>135.03181:0<br>136.03517:0        | 44.05112:78 58.99686:207<br>60.98959:209<br>88.02439:222                                                                                                                                          |
| 12.508 | 72.08035  | Pyrrolidine                 | [M+H] <sup>+</sup>            | 72.0808   | 6.24  | C4H9N      | RWRPKQPQOW-<br>UHFFFAOYSA-N     | 63   | 72.08051:24395<br>73.08386:1640<br>74.08722:2733    | 42.03339:178 43.0404:68<br>44.04549:66 57.05611:62<br>72.07757:128 72.09748:62                                                                                                                    |

|        |           |               |                    |           |       |            |                                      |      |                                                       |                                                                                                                                                                                        |
|--------|-----------|---------------|--------------------|-----------|-------|------------|--------------------------------------|------|-------------------------------------------------------|----------------------------------------------------------------------------------------------------------------------------------------------------------------------------------------|
| 7.796  | 215.14069 | Pro-Val       | [M+H] <sup>+</sup> | 215.13901 | 7.81  | C10H18N2O3 | AWJGUZSYVIVZGP-<br>YUMQZZPRSA-N      | 63.7 | 215.14069:203021<br>216.14404:26956<br>217.1474:3277  | 43.05545:53<br>70.06642:2881<br>70.13721:114 70.19227:57<br>71.06943:56 72.08075:76<br>78.03579:53 118.08894:55<br>43.05826:55 70.06728:245                                            |
| 9.455  | 279.13388 | Pro-Tyr       | [M+H] <sup>+</sup> | 279.13391 | 0.11  | C14H18N2O4 | OIDKVWTWGDW<br>MHY-<br>RYUDHWBXS-A-N | 62.1 | 279.13589:3943<br>280.13924:679<br>281.1426:635       | 43.05826:55 70.06728:245                                                                                                                                                               |
| 2.966  | 217.11885 | Pro-Thr       | [M+H] <sup>+</sup> | 217.1183  | 2.53  | C9H16N2O4  | GVUVRPPYDHHG<br>K-VQVTYTSYSA-N       | 60.8 | 217.11931:20510<br>218.12266:2982<br>219.12602:914    | 44.05127:67 67.04964:141<br>68.04559:63 70.02683:101<br>70.06487:605                                                                                                                   |
| 6.75   | 213.12869 | Pro-Pro       | [M+H] <sup>+</sup> | 213.1234  | 24.82 | C10H16N2O3 | RWCOTLHDJWHR<br>S-YUMQZZPRSA-N       | 62.5 | 213.12407:244682<br>214.12742:28478<br>215.13078:5934 | 43.05542:193<br>70.06567:12990<br>70.13879:544<br>70.16665:189<br>70.26168:139<br>70.33511:121<br>70.43504:106 70.52003:54<br>71.07069:616 71.14332:53<br>99.05984:90<br>116.07009:198 |
| 12.706 | 263.14404 | Pro-Phe       | [M+H] <sup>+</sup> | 263.13901 | 19.12 | C14H18N2O3 | IWIANZLCJVYEFX-<br>RYUDHWBXS-A-N     | 62.2 | 263.14066:107558<br>264.14401:20638<br>265.14737:2737 | 70.06519:3644<br>70.20641:66 71.06618:241<br>118.91826:84<br>120.07478:59                                                                                                              |
| 7.318  | 187.10823 | Prolylalanine | [M+H] <sup>+</sup> | 187.1077  | 2.83  | C8H14N2O3  | FELJDCNGZFDUNR-<br>UHFFFAOYSA-N      | 62.1 | 187.10963:2985<br>188.11298:0<br>189.11634:7525       | 57.04705:96 70.06519:652                                                                                                                                                               |
| 4.178  | 173.0941  | Pro-Gly       | [M+H] <sup>+</sup> | 173.0921  | 11.55 | C7H12N2O3  | RNKSNI BMTUYWS<br>H-YFKPBYRVSA-N     | 62.7 | 173.09126:9838<br>174.09461:1109<br>175.09797:0       | 41.04179:100<br>70.06521:536                                                                                                                                                           |
| 3.497  | 245.11354 | Pro-Glu       | [M+H] <sup>+</sup> | 245.1132  | 1.39  | C10H16N2O5 | QLROSWPKSBORFJ<br>-BQBZGAKWSA-N      | 64.5 | 245.11256:26144<br>246.11591:3787<br>247.11927:794    | 70.06563:547                                                                                                                                                                           |

|       |           |             |                      |           |       |            |                                 |      |                                                    |                                                                                                                                                                                                                                                                                                                                                                                                                                                                                                                                                                                                                                      |
|-------|-----------|-------------|----------------------|-----------|-------|------------|---------------------------------|------|----------------------------------------------------|--------------------------------------------------------------------------------------------------------------------------------------------------------------------------------------------------------------------------------------------------------------------------------------------------------------------------------------------------------------------------------------------------------------------------------------------------------------------------------------------------------------------------------------------------------------------------------------------------------------------------------------|
| 2.72  | 244.13066 | Pro-Gln     | [M+H] <sup>+</sup>   | 244.1292  | 5.98  | C10H17N3O4 | SHAQGFGGJSLLE-<br>BQBZGAKWSA-N  | 63.1 | 244.13231:26253<br>245.13566:4733<br>246.13902:673 | 56.04865:109<br>70.0667:2233 70.13775:95<br>70.18986:50 84.04395:342<br>84.08085:68<br>70.0658:108                                                                                                                                                                                                                                                                                                                                                                                                                                                                                                                                   |
| 2.708 | 231.09877 | Pro-Asp     | [M+H] <sup>+</sup>   | 231.0975  | 5.50  | C9H14N2O5  | GLEOIKLQBZNKJZ-<br>WDSKDSINSA-N | 60.1 | 231.09892:13610<br>232.10227:1611<br>233.10563:0   | 70.0658:108                                                                                                                                                                                                                                                                                                                                                                                                                                                                                                                                                                                                                          |
| 2.163 | 230.11342 | Pro-Asn     | [M+H] <sup>+</sup>   | 230.11349 | 0.30  | C9H15N3O4  | JQOHKCDMINQZR<br>V-WDSKDSINSA-N | 60.1 | 230.11372:10333<br>231.11707:2025<br>232.12043:0   | 70.06171:56                                                                                                                                                                                                                                                                                                                                                                                                                                                                                                                                                                                                                          |
| 6.684 | 172.11455 | Pro-Ala-Arg | [M+2H] <sup>2+</sup> | 172.10809 | 37.53 | C14H26N6O4 | VXCHGLYSIOOZIS-<br>UHFFFAOYSA-N | 63.1 | 172.11455:3783<br>173.1179:586<br>174.12126:919    | 41.03749:204 42.03234:99<br>43.02866:1122<br>43.05441:1558<br>43.11605:51 43.34594:67<br>44.03719:132 46.06727:76<br>53.04128:149 53.0627:55<br>55.027:239 55.05369:231<br>56.04609:72 57.03405:86<br>57.07005:59<br>60.05615:4160<br>60.12466:184 60.15075:68<br>67.05567:403<br>68.04923:363<br>70.06612:39697<br>70.13917:2185<br>70.21603:74 70.29211:114<br>70.37391:100 70.42239:76<br>70.47812:106<br>70.56183:128 70.60428:55<br>70.96516:59 70.99144:68<br>71.0501:897 71.11448:75<br>72.08518:532 72.39101:60<br>73.06046:99 84.08415:632<br>85.06209:102<br>97.07232:207<br>98.06554:133<br>112.08411:53<br>116.06668:141 |



130.10408:115

130.13831:73

|       |           |                |                    |           |      |           |                                 |      |                                                     |                                                                                                                                                                                                       |
|-------|-----------|----------------|--------------------|-----------|------|-----------|---------------------------------|------|-----------------------------------------------------|-------------------------------------------------------------------------------------------------------------------------------------------------------------------------------------------------------|
| 3.493 | 187.10924 | Pro-Ala        | [M+H] <sup>+</sup> | 187.1077  | 8.23 | C8H14N2O3 | FELJDCNGZFDUNR-<br>WDSKDSINSA-N | 65.7 | 187.10788:52060<br>188.11123:6207<br>189.11459:892  | 70.06628:1001<br>70.12289:55 71.04183:72<br>72.04478:82                                                                                                                                               |
| 18.57 | 167.03261 | Phthalic acid  | [M+H] <sup>+</sup> | 167.03391 | 7.78 | C8H6O4    | XNGIFLGASWRNHJ<br>-UHFFFAOYSA-N | 66.7 | 167.0332:29223<br>168.03655:2858<br>169.03991:711   | 65.03739:901<br>65.07549:107<br>66.04279:120<br>93.03182:414 93.06886:50<br>121.02256:161                                                                                                             |
| 1.148 | 184.07262 | Phosphocholine | [M+H] <sup>+</sup> | 184.0733  | 3.69 | C5H14NO4P | YHHSOZFOIEMCP<br>-UHFFFAOYSA-N  | 68.6 | 184.07262:96448<br>185.07597:6961<br>186.07933:4252 | 44.05262:77 45.0337:848<br>45.0794:66 56.04885:139<br>58.06053:244<br>59.06796:119 59.09115:60<br>60.08175:288 71.0729:849<br>80.97437:391<br>86.09527:1214 86.179:75<br>87.0972:142<br>98.98487:1995 |

|        |           |                  |                            |           |       |            |                                    |      |                                                      |                                                                                                                                                                                                                                                                                        |
|--------|-----------|------------------|----------------------------|-----------|-------|------------|------------------------------------|------|------------------------------------------------------|----------------------------------------------------------------------------------------------------------------------------------------------------------------------------------------------------------------------------------------------------------------------------------------|
|        |           |                  |                            |           |       |            |                                    |      |                                                      | 99.04916:122                                                                                                                                                                                                                                                                           |
|        |           |                  |                            |           |       |            |                                    |      |                                                      | 100.98462:86                                                                                                                                                                                                                                                                           |
|        |           |                  |                            |           |       |            |                                    |      |                                                      | 104.09862:66                                                                                                                                                                                                                                                                           |
|        |           |                  |                            |           |       |            |                                    |      |                                                      | 124.99689:487                                                                                                                                                                                                                                                                          |
|        |           |                  |                            |           |       |            |                                    |      |                                                      | 125.09075:50                                                                                                                                                                                                                                                                           |
|        |           |                  |                            |           |       |            |                                    |      |                                                      | 126.00359:95                                                                                                                                                                                                                                                                           |
| 13.032 | 263.13269 | Phe-Pro          | [M+H] <sup>+</sup>         | 263.13901 | 24.02 | C14H18N2O3 | WEQJQNWXCSUV<br>MA-<br>RYUDHWBXSAN | 70.4 | 263.14035:118113<br>264.1437:17468<br>265.14706:3166 | 70.06506:1765<br>70.13827:73 71.06998:90<br>72.04785:52 77.03465:277<br>91.04935:124<br>93.06586:362<br>103.05128:686<br>104.05209:82<br>116.06767:847<br>120.07911:4247<br>120.176:137<br>121.08433:256<br>132.07237:60 146.0441:54<br>147.05804:111<br>160.09061:58<br>120.08092:762 |
| 11.895 | 223.11041 | Phe-Gly          | [M+H] <sup>+</sup>         | 223.1077  | 12.15 | C11H14N2O3 | GLUBLISJVJFHQS-<br>VIFPVBQESA-N    | 63.8 | 223.11028:25229<br>224.11363:3602<br>225.11699:789   |                                                                                                                                                                                                                                                                                        |
| 7.615  | 147.04919 | p-Coumaric acid  | [M+H-<br>H2O] <sup>+</sup> | 147.0441  | 34.62 | C9H8O3     | NGSWKAQJWESN<br>S-ZZXKVVIFSA-N     | 68.9 | 147.04713:10547<br>148.05048:1233<br>149.05384:552   | 65.04132:189<br>91.05457:106                                                                                                                                                                                                                                                           |
| 3.244  | 220.1196  | Pantothenic acid | [M+H] <sup>+</sup>         | 220.1179  | 7.72  | C9H17NO5   | GHOKWGTUZJEAQ<br>D-UHFFFAOYSA-N    | 60.8 | 220.1169:64364<br>221.12025:7848<br>222.12361:1030   | 41.03819:84 43.01712:331<br>43.04611:54 55.01641:100<br>57.06841:237 59.0498:220<br>67.051:141 69.06993:96<br>70.02934:638<br>72.04301:207<br>73.02928:150 75.69403:53<br>77.0433:107 85.06319:81<br>88.02149:144<br>90.04818:171<br>94.06056:108<br>96.07964:135 98.01888:58          |

|        |           |                            |                   |           |       |           |                                 |      |                                                       |                                                                                                                                                                                        |
|--------|-----------|----------------------------|-------------------|-----------|-------|-----------|---------------------------------|------|-------------------------------------------------------|----------------------------------------------------------------------------------------------------------------------------------------------------------------------------------------|
|        |           |                            |                   |           |       |           |                                 |      |                                                       | 99.00668:53<br>124.06865:155<br>124.10094:50                                                                                                                                           |
| 1.698  | 120.06734 | O-tert-Butylthreonine      | [M+H-<br>C4H8]+   | 120.0655  | 15.32 | C8H17NO3  | NMJINEMBBQVPG<br>Y-RITPCOANSA-N | 66.9 | 120.06723:147829<br>121.07058:9039<br>122.07394:1830  | 41.03115:61 43.02437:130<br>43.04443:76 44.04948:65<br>46.03061:238<br>56.05048:2517<br>56.14328:53 57.04026:386<br>58.0304:122 58.06604:63<br>74.06319:114 75.05974:61<br>76.01595:69 |
| 15.918 | 288.21912 | Octanoylcarnitine          | [M+H]+            | 288.21689 | 7.74  | C15H29NO4 | CXTATJFJDMJMIY-<br>CYBMUJFWSA-N | 62.3 | 288.2179:8870<br>289.22125:3474<br>290.22461:0        | 55.05307:57 57.07001:102<br>57.08704:59 59.07866:52<br>60.07966:67 69.072:66<br>85.02818:712<br>144.11455:56                                                                           |
| 3.328  | 124.04074 | Nicotinic acid             | [M+H]+            | 124.0393  | 11.61 | C6H5NO2   | PVNIIMVLHYAWGP<br>-UHFFFAOYSA-N | 71.6 | 124.04074:150873<br>125.04409:13878<br>126.04745:1527 | 51.02422:146<br>52.01993:332<br>53.03951:1612<br>53.07409:164 53.10025:87<br>78.03476:2430<br>78.11172:66 79.04221:384<br>80.049:1505 81.05206:273<br>124.04147:265                    |
| 11.767 | 116.07244 | NG,NG-<br>Dimethylarginine | [M+H-<br>C3H9N3]+ | 116.0706  | 15.85 | C8H18N4O2 | YDGMGEXADBMO<br>MJ-LURJTMIESA-N | 62.6 | 116.07103:24427<br>117.07438:1976<br>118.07774:571    | 70.06855:699<br>71.06545:146                                                                                                                                                           |

|        |           |                      |               |          |       |            |                              |      |                                                       |                                                                                                                                                                                                                                                                                                                                                                                                       |
|--------|-----------|----------------------|---------------|----------|-------|------------|------------------------------|------|-------------------------------------------------------|-------------------------------------------------------------------------------------------------------------------------------------------------------------------------------------------------------------------------------------------------------------------------------------------------------------------------------------------------------------------------------------------------------|
| 12.808 | 188.07274 | N-Formyltryptophan   | [M+H-CH3NO]+  | 188.0706 | 11.38 | C12H12N2O3 | RNEMLJPSSOJRHX-UHFFFAOYSA-N  | 71   | 188.07234:449555<br>189.07569:61528<br>190.07905:5177 | 65.03569:53<br>90.04288:64<br>91.05295:2526<br>91.1384:87<br>91.35542:59<br>92.05348:188<br>103.0534:65<br>115.05213:1721<br>116.05704:539<br>117.05865:862<br>117.18151:52<br>118.06322:3780<br>118.15803:123<br>118.3343:65<br>119.0669:538<br>119.34892:54<br>127.04984:219<br>128.04755:171<br>140.04739:106<br>142.06152:868<br>143.0706:1282<br>144.07138:327<br>146.05986:132<br>170.06609:105 |
| 2.605  | 287.19733 | N-Cyclopentylglycine | [2M+H]+       | 287.1965 | 2.89  | C7H13NO2   | LRHRHAWNXCGB-U-UHFFFAOYSA-N  | 62.5 | 287.19836:14481<br>288.20171:2573<br>289.20507:0      | 58.064:77<br>71.07626:60<br>144.1028:1169<br>145.09712:96<br>146.11432:51                                                                                                                                                                                                                                                                                                                             |
| 7.615  | 136.0811  | N-Acetyltyrosine     | [M+H-C3H4O3]+ | 136.0757 | 39.68 | C11H13NO4  | CAHKINHBCWCHC-F-JTQLQIEISA-N | 64   | 136.07713:77570<br>137.08048:6630<br>138.08384:0      | 41.03827:82<br>44.04217:52<br>51.02575:65<br>53.04073:91<br>63.02268:74<br>65.04076:780<br>66.04195:106<br>77.03796:203<br>78.04409:84<br>79.05994:90<br>82.07107:74<br>91.05722:1784<br>91.14362:57<br>92.05949:211<br>94.04434:148<br>106.06386:58<br>107.0496:380<br>107.09712:61<br>108.05651:89<br>118.91967:95                                                                                  |

|        |           |                             |                            |           |       |           |                              |      |                                                    |                                                                                                                                                                                                                                                                              |
|--------|-----------|-----------------------------|----------------------------|-----------|-------|-----------|------------------------------|------|----------------------------------------------------|------------------------------------------------------------------------------------------------------------------------------------------------------------------------------------------------------------------------------------------------------------------------------|
| 2.688  | 112.0774  | 1-Acetylproline             | [M+H-CH2O2] <sup>+</sup>   | 112.0757  | 15.17 | C7H11NO3  | GNMSLDIYJOSUSW-LURJTMIESA-N  | 64.2 | 112.0774:4815<br>113.08075:0<br>114.08411:580      | 70.06256:109                                                                                                                                                                                                                                                                 |
| 9.346  | 208.09549 | N-Acetyl phenylalanine      | [M+H] <sup>+</sup>         | 208.0968  | 6.30  | C11H13NO3 | CBQJSKKFNMON-JTQLQIEISA-N    | 61.5 | 208.09549:3659<br>209.09884:1068<br>210.1022:0     | 77.04105:55<br>103.05415:110<br>107.03922:50<br>120.08083:326<br>133.04897:63                                                                                                                                                                                                |
| 3.491  | 158.08226 | N-Acetylproline             | [M+H] <sup>+</sup>         | 158.08121 | 6.64  | C7H11NO3  | GNMSLDIYJOSUSW-ZCFIWIBFSA-N  | 60   | 158.08337:3565<br>159.08672:543<br>160.09008:683   | 43.01791:163<br>70.06426:313 70.09451:56                                                                                                                                                                                                                                     |
| 1.092  | 222.09695 | N-Acetyl glucosamine        | [M+H] <sup>+</sup>         | 222.0972  | 1.13  | C8H15NO6  | OVRNDRQMDRJTH-S-PVFLNQBWSA-N | 60.5 | 222.09898:7357<br>223.10233:1425<br>224.10569:1168 | 41.03871:57 43.01841:173<br>55.01418:73 60.04491:66<br>61.0304:169 72.04369:88<br>78.03716:123<br>81.03438:226<br>83.03979:108<br>84.04568:420<br>85.04842:102 96.0437:243<br>97.04606:101<br>98.04871:104<br>109.03131:57<br>126.05751:117<br>138.05902:249<br>138.11092:61 |
| 8.524  | 116.07121 | N5-(1-Iminoethyl) ornithine | [M+H-C2H6N2] <sup>+</sup>  | 116.0706  | 5.26  | C7H15N3O2 | UYZFAUAYFLEHRC-LURJTMIESA-N  | 62.2 | 116.07088:21540<br>117.07423:1045<br>118.07759:730 | 41.03711:67 70.0657:1108<br>77.0349:111                                                                                                                                                                                                                                      |
| 12.516 | 112.11068 | N1,N12-Diethylspermine      | [M+H-C7H21N3] <sup>+</sup> | 112.1121  | 12.67 | C14H34N4  | PGMIWVSHZMWS-SI-UHFFFAOYSA-N | 64.2 | 112.11054:16190<br>113.11389:1811<br>114.11725:0   | 41.03801:52 55.0535:83<br>55.07234:55 70.05893:70<br>84.08009:666<br>110.09898:122<br>112.1083:62                                                                                                                                                                            |

|        |           |                                         |                    |          |       |           |                                 |      |                                                       |                                                                                                                                                                                                                                                                                                                                                                                                                                                                                                                                                                                                             |
|--------|-----------|-----------------------------------------|--------------------|----------|-------|-----------|---------------------------------|------|-------------------------------------------------------|-------------------------------------------------------------------------------------------------------------------------------------------------------------------------------------------------------------------------------------------------------------------------------------------------------------------------------------------------------------------------------------------------------------------------------------------------------------------------------------------------------------------------------------------------------------------------------------------------------------|
| 12.415 | 144.08228 | N-[2-(1H-Indol-3-yl)ethyl] nicotinamide | [M+H-<br>C6H6N2O]+ | 144.0808 | 10.27 | C16H15N3O | ZDAZUJBASMCUAK<br>-UHFFFAOYSA-N | 68.6 | 144.08224:550277<br>145.08559:80740<br>146.08895:5019 | 41.03656:86 51.02573:74<br>52.02393:78 55.05512:67<br>58.06413:238<br>65.03798:276<br>67.03781:132<br>72.08061:1314<br>77.03714:818 78.04016:89<br>84.08142:226<br>89.03591:235<br>90.04459:288<br>91.05422:1558<br>91.17662:65 92.05279:252<br>101.03488:148<br>103.05327:200<br>104.04887:80<br>115.05338:2270<br>115.14757:91<br>116.05739:739<br>116.14196:50<br>117.06397:1740<br>117.15462:75<br>117.19855:52<br>117.29855:59<br>117.41367:55<br>118.06209:169<br>126.05034:136<br>127.05483:659<br>128.05533:172<br>129.05824:94<br>142.06354:568<br>142.12856:55<br>143.07167:1239<br>144.07513:390 |
| 2.692  | 175.11043 | N- $\alpha$ -Acetylnornithine           | [M+H]+             | 175.1077 | 15.59 | C7H14N2O3 | JRLGPAXAGHMNO<br>L-LURJTMIESA-N | 63.4 | 175.11043:82696<br>176.11378:9244<br>177.11714:1068   | 43.01984:289 43.0564:114<br>70.06661:4909<br>70.13969:187 70.16072:99<br>70.28015:51 71.0702:692<br>81.03783:88 82.06788:95<br>140.93378:51                                                                                                                                                                                                                                                                                                                                                                                                                                                                 |

|        |           |                                              |                                                                   |           |       |                                                                 |                               |      |                                                     |                                                                                                                                                   |
|--------|-----------|----------------------------------------------|-------------------------------------------------------------------|-----------|-------|-----------------------------------------------------------------|-------------------------------|------|-----------------------------------------------------|---------------------------------------------------------------------------------------------------------------------------------------------------|
| 4.547  | 110.07248 | N- $\alpha$ -(tert-Butoxycarbonyl) histidine | [M+H-C <sub>6</sub> H <sub>10</sub> O <sub>4</sub> ] <sup>+</sup> | 110.0713  | 10.72 | C <sub>11</sub> H <sub>17</sub> N <sub>3</sub> O <sub>4</sub>   | AYMLQYFMYHISQ O-QMMMGMPOBSA-N | 65.7 | 110.07154:11380<br>111.07489:1325<br>112.07825:663  | 56.0509:228 66.03522:62<br>81.04433:183 82.05054:57<br>83.05494:60                                                                                |
| 3.319  | 184.10828 | N,N-Dimethylhistidine                        | [M+H] <sup>+</sup>                                                | 184.10809 | 1.03  | C <sub>8</sub> H <sub>13</sub> N <sub>3</sub> O <sub>2</sub>    | IMOBLSLOLPCWZK Q-ZETCQYMHSA-N | 61.2 | 184.10747:3423<br>185.11082:943<br>186.11418:0      | 58.06728:66 68.04954:116<br>95.06015:216<br>138.03006:56<br>138.08974:80<br>138.10611:61                                                          |
| 1.118  | 425.17398 | N,N'-Diacetylchitobiose                      | [M+H] <sup>+</sup>                                                | 425.17661 | 6.19  | C <sub>16</sub> H <sub>28</sub> N <sub>2</sub> O <sub>11</sub>  | PLJAKLUDUPBLGD-VLWZLFBZSA-N   | 62.4 | 425.17398:1972<br>426.17733:895<br>427.18069:0      | 61.03353:75 84.04573:203<br>85.04018:59<br>126.05415:355<br>138.05673:224<br>144.05922:59<br>204.09656:63<br>244.07715:92                         |
| 9.474  | 209.0965  | N-(Aminocarbonyl) phenylalanine              | [M+H] <sup>+</sup>                                                | 209.0921  | 21.04 | C <sub>10</sub> H <sub>12</sub> N <sub>2</sub> O <sub>3</sub>   | IPWQOZCSQLTKOI-QMMMGMPOBSA-N  | 60.4 | 209.09564:4104<br>210.09899:628<br>211.10235:0      | 103.05635:83<br>118.07265:55<br>120.08073:263                                                                                                     |
| 13.936 | 212.11139 | N-(4-Acetylphenyl)-4-methylbenzamide         | [M+H-C <sub>2</sub> H <sub>2</sub> O] <sup>+</sup>                | 212.10699 | 20.74 | C <sub>16</sub> H <sub>15</sub> N <sub>2</sub> O <sub>2</sub>   | WIFHKFKUUAUAK R-UHFFFAOYSA-N  | 64.6 | 212.11092:6797<br>213.11427:1511<br>214.11763:0     | 92.04789:67<br>119.05505:363<br>120.0558:64                                                                                                       |
| 1.911  | 117.10385 | N-(3-Aminopropyl) acetamide                  | [M+H] <sup>+</sup>                                                | 117.1022  | 14.09 | C <sub>5</sub> H <sub>12</sub> N <sub>2</sub> O                 | YFZBPSXRYCOKCW-UHFFFAOYSA-N   | 65.2 | 117.10232:9769<br>118.10567:1820<br>119.10903:0     | 56.05029:234<br>58.06466:471 59.07583:74                                                                                                          |
| 12.141 | 178.13322 | N-(3-(Aminomethyl) benzylacetamidine         | [M+H] <sup>+</sup>                                                | 178.1339  | 3.82  | C <sub>10</sub> H <sub>15</sub> N <sub>3</sub>                  | RODUKNYOEVZQP R-UHFFFAOYSA-N  | 62   | 178.13322:2907<br>179.13657:682<br>180.13993:911    | 118.91999:62<br>120.08963:125<br>178.13306:140                                                                                                    |
| 9.995  | 247.11623 | Met-Pro                                      | [M+H] <sup>+</sup>                                                | 247.1111  | 20.76 | C <sub>10</sub> H <sub>18</sub> N <sub>2</sub> O <sub>3</sub> S | DZMGFGQBRYWJO R-YUMQZZPRSA-N  | 68.9 | 247.11366:47966<br>248.11701:5792<br>249.12037:2854 | 56.05164:696 56.08734:69<br>61.01004:555 69.07378:61<br>70.02817:103 70.0662:786<br>104.05871:59<br>116.07211:430<br>118.07333:60<br>125.07734:57 |

|        |           |               |                     |           |       |             |                                     |      |                                                       |                                                                                                                                                                                                                                                                                                               |
|--------|-----------|---------------|---------------------|-----------|-------|-------------|-------------------------------------|------|-------------------------------------------------------|---------------------------------------------------------------------------------------------------------------------------------------------------------------------------------------------------------------------------------------------------------------------------------------------------------------|
| 5.832  | 207.08185 | Met-Gly       | [M+H] <sup>+</sup>  | 207.0798  | 9.90  | C7H14N2O3S  | QXOHLNCNYLGICT<br>-YFKPBYRVSA-N     | 60   | 207.08157:4253<br>208.08492:0<br>209.08828:15118      | 56.05106:55 61.0095:309<br>84.03779:102                                                                                                                                                                                                                                                                       |
| 6.298  | 279.10059 | Met-Glu       | [M+H] <sup>+</sup>  | 279.10089 | 1.07  | C10H18N2O5S | ADHNYKZHPOEUL<br>M-RQJHMYQMSA-<br>N | 64.1 | 279.10059:11957<br>280.10394:2459<br>281.1073:1376    | 56.0487:160 61.00899:183                                                                                                                                                                                                                                                                                      |
| 1.07   | 685.23749 | Melibiose     | [2M+H] <sup>+</sup> | 685.23969 | 3.21  | C12H22O11   | AYRXSINWFIIFAE-<br>GFRRQCQTSA-N     | 66.3 | 685.23749:3006<br>686.24084:858<br>687.2442:0         | 85.02949:186<br>127.03507:97<br>145.05113:212<br>163.0576:103                                                                                                                                                                                                                                                 |
| 1.077  | 667.22913 | Maltotetraose | [M+H] <sup>+</sup>  | 667.22913 | 0.00  | C24H42O21   | LUEWUZLMQUOBS<br>B-CHYJJPLWSA-N     | 61.8 | 667.23315:1481<br>668.2365:0<br>669.23986:0           | 97.03445:59<br>127.04062:201<br>145.048:202 163.05844:72                                                                                                                                                                                                                                                      |
| 4.842  | 234.1456  | Lys-Ser       | [M+H] <sup>+</sup>  | 234.14481 | 3.37  | C9H19N3O4   | YSZNURNVYFUEHC<br>-BQBZGAKWSA-N     | 64.1 | 234.14586:50300<br>235.14921:6452<br>236.15257:687    | 55.05573:117<br>56.04991:484 67.05531:80<br>84.08138:2735<br>84.16328:89 85.08257:182<br>102.93117:54<br>136.93462:89                                                                                                                                                                                         |
| 10.035 | 244.16566 | Lys-Pro       | [M+H] <sup>+</sup>  | 244.1656  | 0.25  | C11H21N3O3  | AIXUQKMMBQJZC<br>U-IUCAKERBSA-N     | 67.6 | 244.16792:132200<br>245.17127:16614<br>246.17463:6000 | 41.0408:52 43.01876:112<br>55.05289:61 56.05012:906<br>56.28376:65 57.05334:76<br>61.01166:565 67.05297:87<br>68.05881:61<br>70.06648:1587<br>70.14119:68<br>84.08198:7275<br>84.16164:324<br>84.19798:103 84.27502:52<br>85.0854:640 88.03954:60<br>94.0627:62 98.06058:112<br>116.07285:377<br>130.08061:76 |
| 5.986  | 262.14349 | Lys-Asp       | [M+H] <sup>+</sup>  | 262.1398  | 14.08 | C10H19N3O5  | CIOWSLJGLSUOME<br>-BQBZGAKWSA-N     | 61.9 | 262.14191:50236<br>263.14526:7299<br>264.14862:1501   | 55.05699:155<br>56.05097:313 56.08002:64<br>59.06661:83<br>84.08177:2421<br>84.15921:121 84.18377:50                                                                                                                                                                                                          |



|       |           |          |                    |           |       |          |                                 |      |                                                       |                                                                                                                                                                                                                                                                                                                                                                                                                                                              |
|-------|-----------|----------|--------------------|-----------|-------|----------|---------------------------------|------|-------------------------------------------------------|--------------------------------------------------------------------------------------------------------------------------------------------------------------------------------------------------------------------------------------------------------------------------------------------------------------------------------------------------------------------------------------------------------------------------------------------------------------|
|       |           |          |                    |           |       |          |                                 |      |                                                       | 85.08395:273                                                                                                                                                                                                                                                                                                                                                                                                                                                 |
|       |           |          |                    |           |       |          |                                 |      |                                                       | 101.09949:106                                                                                                                                                                                                                                                                                                                                                                                                                                                |
|       |           |          |                    |           |       |          |                                 |      |                                                       | 164.93031:61                                                                                                                                                                                                                                                                                                                                                                                                                                                 |
| 5.146 | 118.08896 | Valine   | [M+H] <sup>+</sup> | 118.0863  | 22.53 | C5H11NO2 | KZSNJWFQEVHDM<br>F-UHFFFAOYSA-N | 70.8 | 118.08636:417403<br>119.08971:28045<br>120.09307:2330 | 40.02626:56 41.03822:507<br>42.03425:1312<br>42.11143:52 43.02014:179<br>43.40185:66 44.04871:150<br>45.00138:161<br>45.03416:429<br>53.03965:386<br>54.04059:227<br>55.05514:11969<br>55.11913:503<br>55.14323:194<br>55.17091:119 55.22021:75<br>55.26519:59 55.73561:54<br>56.05338:2269<br>57.05834:5526<br>57.12546:176 57.15339:89<br>57.49241:66 58.05985:116<br>59.05019:497 67.04383:66<br>72.08138:2870<br>72.1586:109 73.08208:96<br>102.92632:51 |
| 7.615 | 182.08827 | Tyrosine | [M+H] <sup>+</sup> | 182.08121 | 38.77 | C9H11NO3 | OUYCCASQSFEM<br>E-UHFFFAOYSA-N  | 71.1 | 182.0834:464426<br>183.08675:51966<br>184.09011:5183  | 43.01936:140<br>43.03907:188<br>51.02347:316<br>65.03938:1335 65.5985:51<br>66.04633:92 67.05523:93<br>74.01435:113<br>77.04041:3784<br>77.11509:143 77.14334:60<br>77.81937:60 78.04333:243<br>79.05748:204 80.79215:50<br>81.06722:105<br>82.07141:107 89.04292:69<br>91.05495:16713<br>91.13911:727<br>91.17346:262                                                                                                                                       |

91.23411:154 91.38986:79  
91.4453:70 91.478:62  
91.50313:58 91.52796:92  
91.91566:58  
92.05739:2336  
92.1416:109 92.23436:54  
93.05215:121 93.26933:71  
94.03535:131 94.0647:148  
95.04957:4373  
95.13487:173 95.16337:98  
95.20634:76 95.38438:67  
96.05146:381  
103.05514:141  
106.8864:50  
107.04913:1375  
108.05278:133  
109.06447:254  
117.06067:122  
118.06442:414  
119.04819:1910  
119.14602:82  
120.05541:136  
121.06281:72  
123.04356:1455  
124.04494:98  
136.07269:459  
138.0733:51

|        |           |            |                    |          |      |            |                                 |    |                                                         |                                                                                                                                                                                                                                                                                                                                                                                                                                                                                                                                                                                                                                                                                                                                           |
|--------|-----------|------------|--------------------|----------|------|------------|---------------------------------|----|---------------------------------------------------------|-------------------------------------------------------------------------------------------------------------------------------------------------------------------------------------------------------------------------------------------------------------------------------------------------------------------------------------------------------------------------------------------------------------------------------------------------------------------------------------------------------------------------------------------------------------------------------------------------------------------------------------------------------------------------------------------------------------------------------------------|
| 12.808 | 205.09918 | Tryptophan | [M+H] <sup>+</sup> | 205.0972 | 9.65 | C11H12N2O2 | QIVBCDIJIAJPQS-<br>SECBINFHSA-N | 72 | 205.09856:724987<br>206.10191:109052<br>207.10527:10146 | 44.99562:54 46.0312:69<br>53.00028:84 54.03224:77<br>65.0365:97 66.03544:70<br>74.02299:348<br>77.04053:281<br>89.03532:132<br>90.04488:311<br>91.05424:3760<br>91.29662:55 92.05817:610<br>96.49704:63 101.03951:60<br>103.05547:287<br>103.10382:59<br>105.0733:175<br>115.05422:6393<br>115.1478:262<br>115.18456:100<br>115.25337:51<br>115.37315:90<br>116.05985:1149<br>116.14468:57<br>117.06097:4514<br>117.23311:84<br>117.28931:58<br>118.02477:56<br>118.06548:23109<br>118.15896:1220<br>118.19476:384<br>118.28411:218<br>118.33676:151<br>118.42065:162<br>118.47708:166<br>118.58171:89<br>118.62014:82<br>118.65614:86<br>118.67455:55<br>118.85494:68<br>118.90833:67<br>118.96304:74<br>119.06834:3033<br>119.19292:109 |
|--------|-----------|------------|--------------------|----------|------|------------|---------------------------------|----|---------------------------------------------------------|-------------------------------------------------------------------------------------------------------------------------------------------------------------------------------------------------------------------------------------------------------------------------------------------------------------------------------------------------------------------------------------------------------------------------------------------------------------------------------------------------------------------------------------------------------------------------------------------------------------------------------------------------------------------------------------------------------------------------------------------|

119.24722:57  
119.38553:54  
120.07427:129  
127.05448:1289  
127.16088:68  
127.34328:54  
128.05685:318  
129.05101:59  
130.06593:2654  
130.15645:118  
131.06538:400  
131.40654:68  
132.08139:2647  
132.18411:92 133.03:51  
133.08813:296  
134.09421:85  
140.04866:319  
140.10263:66  
141.05031:101  
142.06618:3012  
142.17102:156  
142.2135:64 142.48039:78  
143.07294:6672  
143.17569:270  
143.29416:81  
143.38425:81  
143.42514:54  
143.93016:55  
144.07979:3356  
144.26543:58  
145.08229:245  
146.05989:2825  
146.21466:67  
147.06003:462  
149.0546:60 157.06024:56  
158.08319:146  
159.09554:338  
159.15872:57  
170.0594:616  
170.17122:54

170.67471:57  
171.06226:59  
171.09094:51

|       |           |           |                                         |         |      |                                               |                                 |      |                                              |              |
|-------|-----------|-----------|-----------------------------------------|---------|------|-----------------------------------------------|---------------------------------|------|----------------------------------------------|--------------|
| 1.228 | 102.05557 | Threonine | [M+H-<br>H <sub>2</sub> O] <sup>+</sup> | 102.055 | 5.59 | C <sub>4</sub> H <sub>9</sub> NO <sub>3</sub> | AYFVYJQAPQTCCC-<br>UHFFFAOYSA-N | 64.6 | 102.0553:13447<br>103.05865:0<br>104.06201:0 | 56.04462:113 |
|-------|-----------|-----------|-----------------------------------------|---------|------|-----------------------------------------------|---------------------------------|------|----------------------------------------------|--------------|

|       |           |                             |                    |          |       |           |                                 |      |                                                       |                                                                                                                                                                                                                                                                                                                                                                                                                                                                                                                                                                               |
|-------|-----------|-----------------------------|--------------------|----------|-------|-----------|---------------------------------|------|-------------------------------------------------------|-------------------------------------------------------------------------------------------------------------------------------------------------------------------------------------------------------------------------------------------------------------------------------------------------------------------------------------------------------------------------------------------------------------------------------------------------------------------------------------------------------------------------------------------------------------------------------|
| 7.134 | 218.14189 | Propionylcarnitine          | [M+H] <sup>+</sup> | 218.1387 | 14.62 | C10H19NO4 | UFAHZIUFPNSHSL-<br>MRVPVSSYSA-N | 66.9 | 218.14189:505116<br>219.14524:80039<br>220.1486:10143 | 43.02213:117 44.02267:63<br>44.04715:111 44.05834:77<br>56.05146:185<br>57.03431:2036<br>57.0814:104 57.1168:63<br>58.03494:162<br>58.07043:151 59.07789:74<br>60.08113:1164<br>60.12985:57 60.15417:53<br>72.07825:64 74.06136:218<br>84.08365:286 84.11921:56<br>85.03054:13729<br>85.10996:598<br>85.13551:216<br>85.17271:134<br>85.25544:127 85.30837:54<br>85.37169:50 85.41438:60<br>85.44432:68 85.47034:90<br>85.49285:59 85.84096:74<br>86.03372:790 88.019:127<br>98.09823:70 103.03719:53<br>132.07014:70 140.0631:61<br>144.0948:96 161.06584:70<br>182.91376:89 |
| 11.18 | 116.07571 | Proline                     | [M+H] <sup>+</sup> | 116.0706 | 44.02 | C5H9NO2   | ONIBWKKTOPOVIA<br>-UHFFFAOYSA-N | 67.1 | 116.07169:21201<br>117.07504:1809<br>118.0784:771     | 43.05234:81 58.06629:102<br>68.05318:52 70.06694:443<br>70.11933:50                                                                                                                                                                                                                                                                                                                                                                                                                                                                                                           |
| 4.226 | 130.0874  | Pipecolic acid              | [M+H] <sup>+</sup> | 130.0863 | 8.46  | C6H11NO2  | HXEACLLIILLPRG-<br>YFKPBYRVSA-N | 63.2 | 130.0874:57299<br>131.09075:4868<br>132.09411:723     | 42.03178:60 55.05396:131<br>56.04907:815<br>84.08081:934 84.13683:86<br>97.00168:117                                                                                                                                                                                                                                                                                                                                                                                                                                                                                          |
| 12.56 | 180.10298 | Phenylalanine, methyl ester | [M+H] <sup>+</sup> | 180.1019 | 6.00  | C10H13NO2 | VSDUZFOSJDMAFZ<br>-UHFFFAOYSA-N | 62.7 | 180.10074:8941<br>181.10409:2738<br>182.10745:582     | 77.04062:95 91.05781:148<br>93.07916:62 103.0562:172<br>106.06483:61<br>120.08429:240                                                                                                                                                                                                                                                                                                                                                                                                                                                                                         |

|      |           |            |                    |          |       |           |                                 |    |                                                        |                                                                                                                                                                                                                                                                                                                                                                                                                                              |
|------|-----------|------------|--------------------|----------|-------|-----------|---------------------------------|----|--------------------------------------------------------|----------------------------------------------------------------------------------------------------------------------------------------------------------------------------------------------------------------------------------------------------------------------------------------------------------------------------------------------------------------------------------------------------------------------------------------------|
| 5.68 | 150.06169 | Methionine | [M+H] <sup>+</sup> | 150.0583 | 22.59 | C5H11NO2S | FFEARJCKVFRZRR-<br>BYPYZUCNSA-N | 65 | 150.05823:309208<br>151.06158:21226<br>152.06494:19382 | 41.04028:240 44.04766:68<br>44.97964:427<br>45.98795:146 46.02575:87<br>46.96988:62 46.99421:135<br>49.00688:136 53.0379:153<br>56.04979:4416<br>56.11695:128 56.15549:81<br>56.19213:61 57.05213:227<br>58.99752:57<br>61.01124:5394<br>61.08097:213 61.19873:62<br>62.01412:225<br>63.01302:143 71.99899:67<br>74.02495:157 77.00392:59<br>85.01051:77 87.02928:168<br>88.02125:61 96.08092:69<br>98.10188:88 111.08472:53<br>125.10408:96 |
|------|-----------|------------|--------------------|----------|-------|-----------|---------------------------------|----|--------------------------------------------------------|----------------------------------------------------------------------------------------------------------------------------------------------------------------------------------------------------------------------------------------------------------------------------------------------------------------------------------------------------------------------------------------------------------------------------------------------|

|       |           |        |                    |           |       |           |                                |      |                                                       |                                                                                                                                                                                                                                                                                                                                                                                                                                                                                                                                                                                                                                                                                                                                         |
|-------|-----------|--------|--------------------|-----------|-------|-----------|--------------------------------|------|-------------------------------------------------------|-----------------------------------------------------------------------------------------------------------------------------------------------------------------------------------------------------------------------------------------------------------------------------------------------------------------------------------------------------------------------------------------------------------------------------------------------------------------------------------------------------------------------------------------------------------------------------------------------------------------------------------------------------------------------------------------------------------------------------------------|
| 3.947 | 147.11705 | Lysine | [M+H] <sup>+</sup> | 147.11279 | 28.96 | C6H14N2O2 | KDXKERNBIXSRK-<br>YFKPBYRVSA-N | 69.3 | 147.11433:485189<br>148.11768:40972<br>149.12104:3211 | 40.02656:90 41.03813:967<br>41.09379:56<br>42.03512:1158<br>42.09159:51 43.0192:151<br>43.04392:103 44.0462:67<br>46.03455:69<br>55.05571:1436<br>55.12313:58<br>56.05012:8698<br>56.11761:325 56.21106:51<br>56.31717:51 56.36604:67<br>57.05152:294<br>57.06667:257 58.07233:69<br>65.03943:346<br>67.05408:1324<br>67.11102:57 68.05818:384<br>69.05898:385<br>70.06116:160<br>74.02385:224<br>82.04034:165<br>82.06258:349 82.0927:89<br>84.08217:13665<br>84.16231:509<br>84.19748:160<br>84.23772:121<br>84.28613:100 84.32957:92<br>84.37553:107 84.43094:88<br>84.45639:65 84.48668:63<br>84.64126:69 84.73434:60<br>85.08488:1111<br>85.16656:77 107.04031:85<br>108.05013:61<br>109.05069:210<br>119.03389:70<br>135.05353:88 |
|-------|-----------|--------|--------------------|-----------|-------|-----------|--------------------------------|------|-------------------------------------------------------|-----------------------------------------------------------------------------------------------------------------------------------------------------------------------------------------------------------------------------------------------------------------------------------------------------------------------------------------------------------------------------------------------------------------------------------------------------------------------------------------------------------------------------------------------------------------------------------------------------------------------------------------------------------------------------------------------------------------------------------------|



|       |           |            |                    |          |       |                                                |                                 |      |                                                        |                                                                                                                                                                                                                                                                                                                                                                                                                                                                                                                      |
|-------|-----------|------------|--------------------|----------|-------|------------------------------------------------|---------------------------------|------|--------------------------------------------------------|----------------------------------------------------------------------------------------------------------------------------------------------------------------------------------------------------------------------------------------------------------------------------------------------------------------------------------------------------------------------------------------------------------------------------------------------------------------------------------------------------------------------|
| 8.797 | 132.10338 | Leucine    | [M+H] <sup>+</sup> | 132.1019 | 11.20 | C <sub>6</sub> H <sub>13</sub> NO <sub>2</sub> | ROHFNLRQFUQHC<br>H-YFKPBYSRVSAN | 68.4 | 132.10254:1070127<br>133.10589:87578<br>134.10925:7671 | 41.04007:4599<br>41.09476:152 42.0437:190<br>42.6097:64 43.05542:8764<br>43.11238:377<br>43.13512:145 43.14891:95<br>43.20858:55 43.24496:57<br>43.28622:50<br>44.05153:11020<br>44.10969:521<br>44.12992:144 44.16374:87<br>44.21144:88 44.24863:64<br>45.05208:729 55.0172:237<br>55.05319:415<br>69.07537:182 73.0601:55<br>86.09774:566 86.17113:72                                                                                                                                                              |
| 8.288 | 132.10632 | Isoleucine | [M+H] <sup>+</sup> | 132.1019 | 33.46 | C <sub>6</sub> H <sub>13</sub> NO <sub>2</sub> | AGPKZVBTJJNPAG-<br>UHFFFAOYSA-N | 71.5 | 132.1013:744357<br>133.10465:54021<br>134.10801:5165   | 40.03126:81<br>41.03884:7963<br>41.09546:283 41.15598:61<br>41.23664:72 42.03873:561<br>43.01479:90 43.05311:140<br>44.04934:8149<br>44.10897:412<br>44.12925:130 44.15442:51<br>44.18075:62 44.22876:88<br>45.04168:786 45.1124:59<br>55.05302:97 55.98888:74<br>56.05021:1664<br>56.08526:136<br>56.10973:104<br>57.0569:3482<br>57.12542:120 57.14436:55<br>58.06546:522<br>58.09241:112<br>59.04853:143<br>67.05669:117 69.03398:72<br>69.06951:1851<br>69.14529:63 70.06984:419<br>71.07297:123<br>73.06594:112 |

|       |           |                  |                   |          |       |           |                                  |      |                                                       |                                                                                                                                                                                                                                                                                                                                                                                                                                    |
|-------|-----------|------------------|-------------------|----------|-------|-----------|----------------------------------|------|-------------------------------------------------------|------------------------------------------------------------------------------------------------------------------------------------------------------------------------------------------------------------------------------------------------------------------------------------------------------------------------------------------------------------------------------------------------------------------------------------|
|       |           |                  |                   |          |       |           |                                  |      |                                                       | 86.09672:980 86.15041:53<br>87.10301:75                                                                                                                                                                                                                                                                                                                                                                                            |
| 3.951 | 129.10332 | Lisdexamfetamine | [M+H-<br>C9H13N]+ | 129.1022 | 8.68  | C15H25N3O | VOBHXZCDAVEXEY<br>-JSGCOSHPSA-N  | 68.1 | 129.10336:8509<br>130.10671:147712<br>131.11007:9479  | 41.04119:174<br>42.03362:197 53.04162:65<br>56.05021:1277<br>57.06683:79 65.02959:56<br>67.05385:154 68.05117:80<br>69.05799:115<br>82.06473:146<br>84.08074:1368 85.0834:80                                                                                                                                                                                                                                                       |
| 4.656 | 116.07166 | Hydroxyarginine  | [M+H-<br>CH5N3O]+ | 116.0706 | 9.13  | C6H14N4O3 | FQWRAVYMZULPN<br>K-BYPYZUCNSA-N  | 64.4 | 116.07166:13898<br>117.07501:863<br>118.07837:1158    | 70.06712:497 70.0982:90                                                                                                                                                                                                                                                                                                                                                                                                            |
| 1.393 | 120.06792 | Homoserine       | [M+H]+            | 120.0655 | 20.16 | C4H9NO3   | UKAUYYVFTDYCKQA<br>-VKHMYHEASA-N | 65.6 | 120.0677:6426<br>121.07105:564<br>122.07441:0         | 44.04729:57 56.04768:200                                                                                                                                                                                                                                                                                                                                                                                                           |
| 3.836 | 156.07881 | Histidine        | [M+H]+            | 156.0768 | 12.88 | C6H9N3O2  | HNDVDQJGIGZPNO<br>-YFKPBYRVSA-N  | 71.3 | 156.07823:260376<br>157.08158:20843<br>158.08494:1472 | 41.03825:278 42.03978:87<br>42.43792:50 43.04379:79<br>54.03357:187<br>55.04394:162 55.87814:65<br>56.04969:2374<br>56.11421:79 57.05264:163<br>66.03418:606<br>68.04672:136<br>69.05264:115 71.04937:87<br>81.04646:1327<br>81.15623:68<br>82.05346:1595<br>82.13232:57 82.19868:51<br>83.06164:5189<br>83.14445:238 83.17742:95<br>84.06443:308<br>93.04594:2441<br>93.12605:133<br>94.04535:104<br>95.05792:171<br>109.79744:52 |

|        |           |               |                            |           |       |            |                                 |      |                                                       |                                                                                                                                                                                                                                  |
|--------|-----------|---------------|----------------------------|-----------|-------|------------|---------------------------------|------|-------------------------------------------------------|----------------------------------------------------------------------------------------------------------------------------------------------------------------------------------------------------------------------------------|
|        |           |               |                            |           |       |            |                                 |      |                                                       | 110.07339:1149<br>111.07268:236                                                                                                                                                                                                  |
| 1.913  | 147.07895 | Glutamine     | [M+H] <sup>+</sup>         | 147.0764  | 17.34 | C5H10N2O3  | ZDXPYRJPNDTMRX<br>-VKHMYHEASA-N | 60.8 | 147.07594:21404<br>148.07929:15610<br>149.08265:1053  | 41.03629:83 44.05299:285<br>45.0532:54 56.04746:120<br>58.06613:69 84.04352:328                                                                                                                                                  |
| 1.763  | 148.06125 | Glutamic acid | [M+H] <sup>+</sup>         | 148.06039 | 5.81  | C5H9NO4    | WHUUTDBJXRKM<br>K-VKHMYHEASA-N  | 68.9 | 148.06071:229498<br>149.06406:15828<br>150.06742:2693 | 41.03846:1494 41.0813:84<br>41.11436:53 42.0416:86<br>56.04925:2419<br>57.05008:145 58.06145:80<br>70.06585:58 74.02131:109<br>84.04459:1672<br>84.10641:102<br>85.04759:363                                                     |
| 11.536 | 461.33945 | Leu-Val       | [2M+H] <sup>+</sup>        | 461.3334  | 13.11 | C11H22N2O3 | MDSUKZSLOATHM<br>H-IUCAKERBSA-N | 61.7 | 461.33554:30675<br>462.33889:9507<br>463.34225:1879   | 69.07109:177 72.08523:76<br>86.09848:5175<br>86.18048:192<br>86.21274:114 86.39035:61<br>87.10057:845 87.18468:51<br>118.10427:77<br>145.07571:60<br>154.04855:64 158.0938:62<br>185.17171:68<br>231.1803:246 245.8925:55        |
| 4.121  | 201.12424 | Leu-Ser       | [M+H-<br>H2O] <sup>+</sup> | 201.1234  | 4.18  | C9H18N2O4  | XGDCYUQSFDQISZ-<br>BQBZGAKWSA-N | 61   | 201.12276:3239<br>202.12611:934<br>203.12947:31108    | 53.03629:103<br>60.04531:944 70.02612:75<br>70.06546:1356<br>71.07144:220 77.03871:58<br>116.06381:124                                                                                                                           |
| 11.768 | 229.15863 | Leu-Pro       | [M+H] <sup>+</sup>         | 229.15469 | 17.19 | C11H20N2O3 | VTJUNIYRYIAIHF-<br>IUCAKERBSA-N | 68   | 229.15642:594200<br>230.15977:80432<br>231.16313:9013 | 41.03978:160<br>43.05494:850 43.11186:72<br>44.05064:1443 44.1093:64<br>44.17604:53 70.0675:8540<br>70.13969:252<br>70.16588:167 70.28007:67<br>70.43905:61 71.07181:349<br>86.0985:2561 86.17886:88<br>87.09713:124 88.10284:70 |

|        |           |         |                     |           |       |            |                                 |      |                                                     |                                                                                                                                                                                                                                                                                                                                            |
|--------|-----------|---------|---------------------|-----------|-------|------------|---------------------------------|------|-----------------------------------------------------|--------------------------------------------------------------------------------------------------------------------------------------------------------------------------------------------------------------------------------------------------------------------------------------------------------------------------------------------|
|        |           |         |                     |           |       |            |                                 |      |                                                     | 116.07402:2217<br>116.17073:109                                                                                                                                                                                                                                                                                                            |
| 13.398 | 489.35556 | Leu-Leu | [2M+H] <sup>+</sup> | 489.36469 | 18.66 | C12H24N2O3 | LCPYQJIKPILB-<br>ZJUUVORDSA-N   | 66   | 489.36237:11570<br>490.36572:5438<br>491.36908:1296 | 69.07314:64<br>86.09553:3253<br>86.17034:127<br>87.09609:124<br>113.09293:69<br>132.10316:75<br>199.17398:138<br>245.19185:253                                                                                                                                                                                                             |
| 14.528 | 269.14938 | Leu-His | [M+H] <sup>+</sup>  | 269.1608  | 42.43 | C12H20N4O3 | XWOBNBRUDDUE<br>EY-NXEZZACHSA-N | 67.8 | 269.16251:13552<br>270.16586:2776<br>271.16922:1286 | 56.04846:72 83.05785:332<br>86.09562:97 93.04306:270<br>95.02037:58<br>110.06923:949<br>111.06635:150<br>149.05925:66<br>86.09528:204                                                                                                                                                                                                      |
| 11.053 | 189.12827 | Leu-Gly | [M+H] <sup>+</sup>  | 189.1234  | 25.75 | C8H16N2O3  | LESXFEZIFXFIQR-<br>UHFFFAOYSA-N | 64.4 | 189.12476:49762<br>190.12811:5996<br>191.13147:629  | 86.09528:204                                                                                                                                                                                                                                                                                                                               |
| 12.765 | 288.20139 | Leu-Arg | [M+H] <sup>+</sup>  | 288.203   | 5.59  | C12H25N5O3 | SENJXOPIZNYLHU-<br>RKDXNWHRSA-N | 66.7 | 288.2048:72824<br>289.20815:14114<br>290.21151:1711 | 44.05041:167<br>60.05687:556<br>60.07976:253 61.05775:95<br>69.07362:202<br>70.06868:1348<br>70.12699:61 71.07095:61<br>72.08462:71 86.09962:779<br>86.1587:52 87.09913:127<br>97.076:90 112.09277:116<br>113.08583:100<br>116.07326:302<br>116.20543:57<br>117.07816:72<br>130.11604:87<br>158.09552:170<br>175.12099:172<br>176.12042:57 |

|       |           |                        |                              |           |       |            |                                 |      |                                                       |                                                                                                                                                                                                                                                                  |
|-------|-----------|------------------------|------------------------------|-----------|-------|------------|---------------------------------|------|-------------------------------------------------------|------------------------------------------------------------------------------------------------------------------------------------------------------------------------------------------------------------------------------------------------------------------|
| 3.264 | 223.07675 | Cystathionine          | [M+H] <sup>+</sup>           | 223.07471 | 9.14  | C7H14N2O4S | ILRYLPWNYFXEMH<br>-RFZPGFLSSA-N | 65.9 | 223.07675:100525<br>224.0801:17039<br>225.08346:12172 | 44.04918:124 46.02986:66<br>56.05024:1154<br>61.00963:114<br>74.02345:267 74.0596:135<br>88.02177:4451<br>88.10634:191 88.1262:76<br>89.02547:145<br>90.01762:182<br>102.05625:108<br>124.03908:56<br>134.02621:176                                              |
| 2.014 | 162.11456 | Carnitine              | [M+H] <sup>+</sup>           | 162.1125  | 12.71 | C7H15NO3   | PHIQHXFUZVPYII-<br>ZCFIWIBFSA-N | 72.2 | 162.11456:430284<br>163.11791:38026<br>164.12127:3581 | 41.03911:377<br>43.01908:3068<br>44.0504:336 45.05804:689<br>57.03402:884<br>58.06494:1423<br>58.12925:93 59.07216:673<br>60.08126:1944<br>60.15273:91 61.02809:169<br>73.04842:50 78.02944:57<br>85.03333:556<br>102.09347:845<br>102.16602:51<br>103.03902:326 |
| 1.556 | 134.04483 | Aspartic acid          | [M+H] <sup>+</sup>           | 134.0448  | 0.22  | C4H7NO4    | CKLJMWTZIZZHCS-<br>REOHCLBHSA-N | 63.5 | 134.0461:15838<br>135.04945:593<br>136.05281:0        | 43.02161:184 44.05121:93<br>46.02771:92 74.02657:50                                                                                                                                                                                                              |
| 5.557 | 130.08656 | Arginine, methyl ester | [M+H-<br>CH5N3] <sup>+</sup> | 130.0863  | 2.00  | C7H16N4O2  | ZDXNCMJBOYJV-<br>YFKPBYRVSA-N   | 64.3 | 130.08769:10939<br>131.09104:1050<br>132.0944:0       | 70.06783:122                                                                                                                                                                                                                                                     |

|        |           |                  |                    |           |       |           |                                 |      |                                                        |                                                                                                                                                                                                                                                                                                                                                                                                                                                                                                                                                                                                                                                                                                               |
|--------|-----------|------------------|--------------------|-----------|-------|-----------|---------------------------------|------|--------------------------------------------------------|---------------------------------------------------------------------------------------------------------------------------------------------------------------------------------------------------------------------------------------------------------------------------------------------------------------------------------------------------------------------------------------------------------------------------------------------------------------------------------------------------------------------------------------------------------------------------------------------------------------------------------------------------------------------------------------------------------------|
| 6.463  | 175.12065 | Arginine         | [M+H] <sup>+</sup> | 175.119   | 9.42  | C6H14N4O2 | ODKSFYDXXFIFQN-<br>BYPYZUCNSA-N | 68.6 | 175.11905:1028530<br>176.1224:101474<br>177.12576:8317 | 41.03962:364<br>43.03101:956<br>43.05537:1293<br>43.11283:60 44.03584:221<br>44.05935:145<br>55.02887:157 55.05285:84<br>56.03426:50<br>60.05709:2826 60.1274:86<br>60.14982:61 61.0567:154<br>68.05071:695<br>69.03471:107 69.72744:58<br>70.02916:75<br>70.06695:38838<br>70.14028:1924<br>70.22219:115<br>70.26053:222 70.3205:78<br>70.34708:72 70.43152:71<br>70.51375:75 70.54519:52<br>70.61765:67 70.66637:72<br>70.70923:76 70.76431:79<br>71.06693:2477<br>71.14228:84 71.29501:73<br>72.04922:86 72.08333:505<br>73.07024:57 74.02734:190<br>84.08414:125 86.09393:76<br>95.07044:72 97.0785:67<br>98.06287:198<br>115.09196:216<br>116.07112:186<br>118.92603:59<br>118.95603:52<br>130.09836:219 |
| 10.245 | 203.14244 | AlanylNorleucine | [M+H] <sup>+</sup> | 203.13901 | 16.88 | C9H18N2O3 | RSIYBPVKRVHPQK-<br>UHFFFAOYSA-N | 61.9 | 203.13997:51842<br>204.14332:6144<br>205.14668:1077    | 41.0378:128 44.05004:834<br>45.05352:63 69.06909:408<br>86.09724:757 86.14993:63<br>87.09759:55 109.04564:79                                                                                                                                                                                                                                                                                                                                                                                                                                                                                                                                                                                                  |

|       |           |                                 |                        |          |       |            |                                 |      |                                                     |                                                                                                                                                                                                                                                                                                                                                                                                                                                                                                                                                                       |
|-------|-----------|---------------------------------|------------------------|----------|-------|------------|---------------------------------|------|-----------------------------------------------------|-----------------------------------------------------------------------------------------------------------------------------------------------------------------------------------------------------------------------------------------------------------------------------------------------------------------------------------------------------------------------------------------------------------------------------------------------------------------------------------------------------------------------------------------------------------------------|
| 2.598 | 277.10571 | $\gamma$ -Glutamylglutamic acid | [M+H] <sup>+</sup>     | 277.103  | 9.78  | C10H16N2O7 | OWQDWQKWSLFF<br>FR-WDSKDSINSA-N | 62.4 | 277.10562:42736<br>278.10897:6390<br>279.11233:810  | 41.04222:68 56.05294:141<br>57.02993:54<br>84.04668:1287<br>85.03649:100 102.0529:98<br>115.03579:94<br>130.05066:85<br>136.04208:60<br>149.05647:79                                                                                                                                                                                                                                                                                                                                                                                                                  |
| 4.026 | 144.10356 | L- $\beta$ -Homolysine          | [M+H-NH3] <sup>+</sup> | 144.1019 | 11.52 | C7H16N2O2  | PJDINCOFOROBQ<br>W-LURJTMIESA-N | 66   | 144.10321:23782<br>145.10656:3693<br>146.10992:3872 | 41.04019:634<br>42.03522:700 42.06889:60<br>43.01643:113<br>43.04461:241<br>44.04964:137<br>55.05603:952<br>56.05213:7731<br>56.11195:296 56.1422:119<br>56.16928:70 56.21127:84<br>56.23831:90 56.43476:82<br>57.03583:80 57.06898:171<br>58.06164:97 65.03793:298<br>67.05663:1742<br>67.12988:97 68.05221:234<br>69.06081:743 69.10078:66<br>74.0248:67 82.06886:255<br>82.10082:56<br>84.08429:16432<br>84.16412:686 84.1935:280<br>84.23666:170<br>84.34631:115<br>84.43114:125 84.50006:69<br>84.63417:62 84.66437:82<br>84.84768:64 85.08122:83<br>98.09583:91 |

|        |           |                     |                    |        |       |           |                                 |      |                                                          |                                                                                                                                                                                                                                                                                                                                                                                                                                                                                                                                                                                                                                                                                                                                                                                                                                                                                                          |
|--------|-----------|---------------------|--------------------|--------|-------|-----------|---------------------------------|------|----------------------------------------------------------|----------------------------------------------------------------------------------------------------------------------------------------------------------------------------------------------------------------------------------------------------------------------------------------------------------------------------------------------------------------------------------------------------------------------------------------------------------------------------------------------------------------------------------------------------------------------------------------------------------------------------------------------------------------------------------------------------------------------------------------------------------------------------------------------------------------------------------------------------------------------------------------------------------|
| 12.302 | 246.17247 | Isovalerylcarnitine | [M+H] <sup>+</sup> | 246.17 | 10.03 | C12H23NO4 | IGQBPDJNUXPEMT<br>-SNVBAGLBSA-N | 67.3 | 246.17247:2303454<br>247.17582:434988<br>248.17918:58550 | 41.04139:1868<br>41.08247:121 41.09798:56<br>42.04212:161<br>43.02067:230 43.05555:77<br>44.05138:262<br>45.06014:332<br>57.03703:7907<br>57.07298:13018<br>57.14009:585<br>57.16349:234<br>57.19561:167<br>57.23346:167 57.3091:89<br>57.43364:57 57.51246:53<br>57.6738:63 57.80603:52<br>57.95737:66 58.04155:204<br>58.07221:1434<br>58.13853:94 58.26577:57<br>58.35019:63 59.07525:584<br>59.26291:95<br>60.08437:7553<br>60.15228:287<br>60.17159:118 60.19467:51<br>60.23022:87 60.39358:58<br>60.99008:55 61.03385:228<br>61.09:559 83.14201:78<br>84.08511:1905<br>84.18896:54 84.46867:117<br>84.59404:57 84.72863:67<br>84.75533:65 84.79854:66<br>84.87317:55<br>85.03321:132459<br>85.11276:9375<br>85.50996:85 85.54721:123<br>85.59026:106<br>85.68156:107<br>85.72456:106 85.75204:87<br>85.77585:91 85.83241:73<br>85.85475:90 85.8902:123<br>85.91208:94 85.94531:63<br>86.03677:6396 |
|--------|-----------|---------------------|--------------------|--------|-------|-----------|---------------------------------|------|----------------------------------------------------------|----------------------------------------------------------------------------------------------------------------------------------------------------------------------------------------------------------------------------------------------------------------------------------------------------------------------------------------------------------------------------------------------------------------------------------------------------------------------------------------------------------------------------------------------------------------------------------------------------------------------------------------------------------------------------------------------------------------------------------------------------------------------------------------------------------------------------------------------------------------------------------------------------------|



|        |           |            |                            |          |       |                   |                                 |      |                                                      |                                                                                                                                                                                                                                                                                                                                                                                 |
|--------|-----------|------------|----------------------------|----------|-------|-------------------|---------------------------------|------|------------------------------------------------------|---------------------------------------------------------------------------------------------------------------------------------------------------------------------------------------------------------------------------------------------------------------------------------------------------------------------------------------------------------------------------------|
|        |           |            |                            |          |       |                   |                                 |      | 86.11787:287                                         |                                                                                                                                                                                                                                                                                                                                                                                 |
|        |           |            |                            |          |       |                   |                                 |      | 86.14487:117                                         |                                                                                                                                                                                                                                                                                                                                                                                 |
|        |           |            |                            |          |       |                   |                                 |      | 86.17639:125 86.23451:83                             |                                                                                                                                                                                                                                                                                                                                                                                 |
|        |           |            |                            |          |       |                   |                                 |      | 86.29674:61 86.33807:109                             |                                                                                                                                                                                                                                                                                                                                                                                 |
|        |           |            |                            |          |       |                   |                                 |      | 86.39422:69 86.41766:57                              |                                                                                                                                                                                                                                                                                                                                                                                 |
|        |           |            |                            |          |       |                   |                                 |      | 86.48383:65 86.50632:55                              |                                                                                                                                                                                                                                                                                                                                                                                 |
|        |           |            |                            |          |       |                   |                                 |      | 86.61379:100 86.68466:56                             |                                                                                                                                                                                                                                                                                                                                                                                 |
|        |           |            |                            |          |       |                   |                                 |      | 86.74207:78 86.75848:70                              |                                                                                                                                                                                                                                                                                                                                                                                 |
|        |           |            |                            |          |       |                   |                                 |      | 86.89024:80 87.03786:830                             |                                                                                                                                                                                                                                                                                                                                                                                 |
|        |           |            |                            |          |       |                   |                                 |      | 87.10484:69 87.15585:59                              |                                                                                                                                                                                                                                                                                                                                                                                 |
|        |           |            |                            |          |       |                   |                                 |      | 87.22612:58 89.6102:53                               |                                                                                                                                                                                                                                                                                                                                                                                 |
|        |           |            |                            |          |       |                   |                                 |      | 96.0854:68 98.09673:95                               |                                                                                                                                                                                                                                                                                                                                                                                 |
|        |           |            |                            |          |       |                   |                                 |      | 103.04055:95                                         |                                                                                                                                                                                                                                                                                                                                                                                 |
|        |           |            |                            |          |       |                   |                                 |      | 103.08319:282                                        |                                                                                                                                                                                                                                                                                                                                                                                 |
|        |           |            |                            |          |       |                   |                                 |      | 105.08705:57                                         |                                                                                                                                                                                                                                                                                                                                                                                 |
|        |           |            |                            |          |       |                   |                                 |      | 129.08519:492                                        |                                                                                                                                                                                                                                                                                                                                                                                 |
|        |           |            |                            |          |       |                   |                                 |      | 144.10852:1806                                       |                                                                                                                                                                                                                                                                                                                                                                                 |
|        |           |            |                            |          |       |                   |                                 |      | 144.26768:65                                         |                                                                                                                                                                                                                                                                                                                                                                                 |
|        |           |            |                            |          |       |                   |                                 |      | 145.11339:186                                        |                                                                                                                                                                                                                                                                                                                                                                                 |
|        |           |            |                            |          |       |                   |                                 |      | 162.12146:181                                        |                                                                                                                                                                                                                                                                                                                                                                                 |
| 12.81  | 132.08141 | Indapamide | [M+H-<br>C7H7CIN2O<br>3S]+ | 132.0808 | 4.62  | C16H16CIN3O3<br>S | NDDAHWYSQHTH<br>NT-UHFFFAOYSA-N | 63.9 | 132.08205:8246<br>133.0854:1219<br>134.08876:0       | 117.0619:75                                                                                                                                                                                                                                                                                                                                                                     |
| 11.537 | 231.17419 | Ile-Val    | [M+H]+                     | 231.1703 | 16.83 | C11H22N2O3        | BCXBIONYYJCSD-<br>CIUDSAMPLSA-N | 67.2 | 231.17419:458707<br>232.17754:71157<br>233.1809:8039 | 41.04092:1105<br>41.07592:76 43.0579:89<br>44.05178:2557 44.1088:63<br>44.30324:60 44.43355:61<br>45.05583:188<br>56.04962:229 56.96447:64<br>57.05663:207 67.061:57<br>69.07231:3330<br>69.1441:135 69.26608:52<br>70.0759:305 72.08518:764<br>72.29193:59 74.05829:61<br>85.65752:54<br>86.10015:6486<br>86.20309:137 86.23961:76<br>86.35312:63 87.10474:338<br>118.91988:99 |

|        |           |         |                    |           |       |            |                                 |      |                                                      |                                                                                                                                                                                                                                                                                                                                                                                                                              |
|--------|-----------|---------|--------------------|-----------|-------|------------|---------------------------------|------|------------------------------------------------------|------------------------------------------------------------------------------------------------------------------------------------------------------------------------------------------------------------------------------------------------------------------------------------------------------------------------------------------------------------------------------------------------------------------------------|
| 6.719  | 233.14995 | Ile-Thr | [M+H] <sup>+</sup> | 233.1496  | 1.50  | C10H20N2O4 | DRCKHKZYJYFQ-<br>YWIQKCBGSA-N   | 63.1 | 233.15056:62673<br>234.15391:7795<br>235.15727:0     | 41.03584:218<br>44.04996:282 57.05965:55<br>67.0526:56 69.06785:404<br>86.09619:699 87.09707:70<br>118.92463:204<br>159.04739:79 165.9733:88                                                                                                                                                                                                                                                                                 |
| 6.183  | 219.13454 | Ile-Ser | [M+H] <sup>+</sup> | 219.1339  | 2.92  | C9H18N2O4  | TWVKGYNQQAUN<br>RN-ACZMJKKPSA-N | 67.4 | 219.13301:63424<br>220.13636:7762<br>221.13972:1348  | 41.03777:427<br>41.05672:110<br>44.05147:567<br>44.07538:134<br>58.06674:102<br>69.06957:750 70.06293:52<br>75.067:94 86.09776:690<br>87.09695:126<br>104.94244:69 191.1429:53                                                                                                                                                                                                                                               |
| 11.177 | 229.16508 | Ile-Pro | [M+H] <sup>+</sup> | 229.15469 | 45.34 | C11H20N2O3 | BBIXOODYWPFND<br>T-CIUDSAMLSA-N | 69.9 | 229.1552:516490<br>230.15855:70873<br>231.16191:7322 | 41.03905:818 41.08678:64<br>44.04979:1832<br>44.10433:59 45.05295:115<br>55.05104:57 56.05251:108<br>57.06027:222<br>58.06441:271 58.99408:65<br>69.07146:2593<br>69.12304:169 69.17368:78<br>70.06684:7578<br>70.13559:229<br>70.16225:125 70.27633:54<br>70.52676:51 70.9544:66<br>71.0682:567 72.24392:53<br>86.09724:3528<br>86.17351:86 87.10232:258<br>116.07104:2063<br>117.07732:102<br>122.94785:53<br>135.08669:54 |

|        |           |         |                    |          |       |            |                                 |      |                                                       |                                                                                                                                                                                                                                                                                                                                                                                            |
|--------|-----------|---------|--------------------|----------|-------|------------|---------------------------------|------|-------------------------------------------------------|--------------------------------------------------------------------------------------------------------------------------------------------------------------------------------------------------------------------------------------------------------------------------------------------------------------------------------------------------------------------------------------------|
| 12.081 | 260.19666 | Ile-Lys | [M+H] <sup>+</sup> | 260.1969 | 0.92  | C12H25N3O3 | UWBNOCIDGPQE-<br>LPEHRKFASA-N   | 66.5 | 260.19858:170475<br>261.20193:28652<br>262.20529:3240 | 41.03984:299 44.04902:84<br>56.04562:59 67.05515:178<br>69.07345:315 83.66894:73<br>84.04385:54<br>84.08221:2959<br>84.15842:121<br>85.08527:114 85.10703:53<br>86.0972:1482<br>86.16716:104<br>87.10511:108 91.04949:94<br>107.05024:73<br>107.08826:53<br>121.06097:70<br>129.1076:170<br>130.08734:593<br>147.11247:55<br>149.09268:73<br>182.91817:80<br>219.93713:59<br>245.16225:112 |
| 13.738 | 245.18016 | Ile-Leu | [M+H] <sup>+</sup> | 245.186  | 23.82 | C12H24N2O3 | JWBXCSQZLLIOCI-<br>LPEHRKFASA-N | 63.4 | 245.18176:212657<br>246.18511:38371<br>247.18847:4640 | 41.03645:185 42.03741:53<br>43.01868:172 43.0487:88<br>44.04905:452 45.05708:85<br>52.47237:52 57.05547:90<br>58.06891:59 67.05203:71<br>69.06798:722 69.12154:57<br>70.07027:69 85.02624:77<br>86.09434:2025<br>86.17671:81 87.09709:56<br>91.04749:199 93.07178:57<br>97.05621:54                                                                                                        |
| 12.196 | 269.16232 | Ile-His | [M+H] <sup>+</sup> | 269.1608 | 5.65  | C12H20N4O3 | QNBVCZTZNQVDM<br>I-FXBDTBDDSA-N | 66.8 | 269.16412:34766<br>270.16747:6806<br>271.17083:1343   | 41.04002:78 56.04884:76<br>57.03696:64 69.06989:98<br>72.08492:90 83.05712:87<br>83.08385:69 86.09588:226<br>86.12511:70 93.04816:57<br>95.05502:244 95.08612:53<br>110.07151:2077<br>110.14115:65 111.073:126                                                                                                                                                                             |

|       |           |         |                    |           |       |            |                                     |      |                                                       |                                                                                                                                                                                                                                                                                                                                    |
|-------|-----------|---------|--------------------|-----------|-------|------------|-------------------------------------|------|-------------------------------------------------------|------------------------------------------------------------------------------------------------------------------------------------------------------------------------------------------------------------------------------------------------------------------------------------------------------------------------------------|
|       |           |         |                    |           |       |            |                                     |      |                                                       | 121.05789:77                                                                                                                                                                                                                                                                                                                       |
|       |           |         |                    |           |       |            |                                     |      |                                                       | 139.04988:64                                                                                                                                                                                                                                                                                                                       |
|       |           |         |                    |           |       |            |                                     |      |                                                       | 155.94077:58                                                                                                                                                                                                                                                                                                                       |
|       |           |         |                    |           |       |            |                                     |      |                                                       | 156.07513:174                                                                                                                                                                                                                                                                                                                      |
|       |           |         |                    |           |       |            |                                     |      |                                                       | 200.91061:73                                                                                                                                                                                                                                                                                                                       |
| 7.532 | 189.12624 | Ile-Gly | [M+H] <sup>+</sup> | 189.1234  | 15.02 | C8H16N2O3  | UCGDDTHMMVW<br>VMV-FSPLSTOPSA-<br>N | 65   | 189.1259:107716<br>190.12925:11394<br>191.13261:2025  | 41.03768:315<br>44.04937:481 55.0545:204<br>57.05707:199<br>69.06887:515 84.08543:65<br>86.09448:556 86.13959:70                                                                                                                                                                                                                   |
| 7.409 | 261.14478 | Ile-Glu | [M+H] <sup>+</sup> | 261.1445  | 1.07  | C11H20N2O5 | KTGFOCFYOZQVRJ-<br>ACLDMZEESA-N     | 64   | 261.14648:144392<br>262.14983:41831<br>263.15319:5749 | 41.03837:263<br>44.04947:304 45.02799:51<br>45.04773:74 55.05846:73<br>56.05064:105 57.03273:98<br>58.06383:109<br>69.07058:685 69.12125:59<br>70.07001:69 84.0478:280<br>85.03072:712<br>86.09705:2241<br>86.17995:66 87.0955:150<br>102.05722:53<br>130.04579:53<br>144.09897:66<br>148.05638:74<br>149.04222:91<br>192.98679:76 |
| 6.985 | 260.16037 | Ile-Gln | [M+H] <sup>+</sup> | 260.16049 | 0.46  | C11H21N3O4 | CNPNWGHRMBQH<br>BZ-ACLDMZEESA-N     | 61.2 | 260.1608:48105<br>261.16415:8575<br>262.16751:3932    | 41.03803:141<br>43.05201:125<br>44.04972:176 44.06339:78<br>45.04834:61 46.06409:80<br>69.02876:98 70.06744:54<br>84.04475:1005<br>85.04907:182<br>86.09711:829<br>87.10244:104<br>102.93959:58<br>130.04916:438<br>131.04474:69<br>182.90245:99                                                                                   |

|        |           |         |                    |           |       |            |                                 |      |                                                       |                                                                                                                                                                                                                                                                 |
|--------|-----------|---------|--------------------|-----------|-------|------------|---------------------------------|------|-------------------------------------------------------|-----------------------------------------------------------------------------------------------------------------------------------------------------------------------------------------------------------------------------------------------------------------|
| 7.668  | 203.14497 | Ile-Ala | [M+H] <sup>+</sup> | 203.13901 | 29.34 | C9H18N2O3  | RCFDOSNHHZGBO<br>Y-ACZMJKKPSA-N | 64.7 | 203.14247:185614<br>204.14582:25753<br>205.14918:2720 | 41.0395:402 44.05037:603<br>57.06802:66 69.07037:773<br>85.02667:68<br>86.09831:1239<br>86.18163:61 87.09953:137                                                                                                                                                |
| 12.969 | 255.14706 | His-Val | [M+H] <sup>+</sup> | 255.1452  | 7.29  | C11H18N4O3 | VLDVBZICYBVQHB-<br>IUCAKERBSA-N | 68.4 | 255.14629:75925<br>256.14964:12198<br>257.153:1431    | 55.05436:87 56.04842:141<br>56.06613:90 66.03566:99<br>67.05569:52 68.04738:78<br>81.04253:117<br>82.05036:115<br>83.06149:1101<br>84.06809:75 93.0458:561<br>110.07142:3468<br>110.16564:101<br>111.07627:167<br>113.07538:78<br>164.11682:119<br>175.07571:60 |
| 14.966 | 342.15707 | His-Trp | [M+H] <sup>+</sup> | 342.1561  | 2.83  | C17H19N5O3 | FBTYOQIYBULKEH-<br>ZFWWWQNUSA-N | 60   | 342.15567:11978<br>343.15902:3587<br>344.16238:0      | 60.08094:53 70.06289:52<br>83.06326:69 84.07616:60<br>86.10032:57 87.09364:60<br>93.04631:65 105.06458:52<br>106.90231:88<br>110.07146:1144<br>111.07573:66<br>170.05026:52<br>252.18443:60                                                                     |
| 10.239 | 253.13098 | His-Pro | [M+H] <sup>+</sup> | 253.1295  | 5.85  | C11H16N4O3 | LNCFUHAPNTYMJB<br>-IUCAKERBSA-N | 69.1 | 253.13141:86913<br>254.13476:12971<br>255.13812:5383  | 56.04919:253 57.05536:82<br>70.06364:284 81.0457:103<br>82.05238:100 82.7178:86<br>83.05966:1498<br>83.14132:87 84.0661:155<br>93.04523:1369<br>94.04597:163 95.06487:78<br>109.06184:57<br>110.0723:5664<br>110.16292:148<br>110.23589:66<br>111.0741:502      |

|        |           |         |                    |           |       |            |                                     |      |                                                      |                                                                                                                                                                                                         |
|--------|-----------|---------|--------------------|-----------|-------|------------|-------------------------------------|------|------------------------------------------------------|---------------------------------------------------------------------------------------------------------------------------------------------------------------------------------------------------------|
|        |           |         |                    |           |       |            |                                     |      |                                                      | 116.06988:63<br>122.06414:61<br>167.02852:68                                                                                                                                                            |
| 12.889 | 284.17639 | His-Lys | [M+H] <sup>+</sup> | 284.17169 | 16.54 | C12H21N5O3 | CZVQSYNVUHAILZ-<br>UWVGGRQHSA-N     | 61.8 | 284.17453:24599<br>285.17788:5717<br>286.18124:1068  | 81.07293:96 84.08479:78<br>91.05821:76 93.03711:84<br>95.05427:66<br>110.07039:555                                                                                                                      |
| 14.279 | 269.15176 | His-Ile | [M+H] <sup>+</sup> | 269.1608  | 33.59 | C12H20N4O3 | IDXZDKMBEXLFMB<br>-HGNGGELXSA-N     | 66.8 | 269.16287:53731<br>270.16622:10301<br>271.16958:1487 | 56.04653:349 66.02747:53<br>69.06976:53<br>83.05433:1233<br>93.03942:563 94.04516:83<br>95.05052:69<br>110.06515:3513<br>110.15727:125<br>110.19118:52<br>111.07165:332<br>123.04897:66<br>178.12451:65 |
| 13.067 | 293.13766 | His-His | [M+H] <sup>+</sup> | 293.13571 | 6.65  | C12H16N6O3 | SGCGMORCWLEJN<br>Z-UWVGGRQHSA-<br>N | 60.5 | 293.13766:21913<br>294.14101:4700<br>295.14437:1250  | 56.04917:98 58.96055:751<br>59.05723:54 83.06764:200<br>93.04208:118 95.0611:95<br>107.06084:53<br>110.07128:1003<br>111.08002:61<br>152.90257:63                                                       |
| 6.506  | 213.09856 | His-Gly | [M+H] <sup>+</sup> | 213.09821 | 1.64  | C8H12N4O3  | LYCVKHSJGDMM-<br>LURJTMIESA-N       | 66   | 213.09764:35166<br>214.10099:4051<br>215.10435:0     | 56.04898:76 66.03334:79<br>70.06346:50 72.08123:147<br>83.06009:824<br>93.04353:496 94.04693:97<br>97.06895:54<br>110.07175:1742<br>110.16132:55<br>111.07352:73                                        |
| 7.718  | 285.12433 | His-Glu | [M+H] <sup>+</sup> | 285.11929 | 17.68 | C11H16N4O5 | VHOLZZKNEBBHTH<br>-YUMQZZPRSA-N     | 63.6 | 285.12277:34941<br>286.12612:5812<br>287.12948:790   | 56.04882:96 70.06428:56<br>83.05805:531<br>93.04468:428 94.04674:98<br>110.07227:1771<br>111.07642:84 114.0547:58                                                                                       |

|       |           |                                 |                               |           |       |                   |                                     |      |                                                    |                                                                                                                                                                                                                      |
|-------|-----------|---------------------------------|-------------------------------|-----------|-------|-------------------|-------------------------------------|------|----------------------------------------------------|----------------------------------------------------------------------------------------------------------------------------------------------------------------------------------------------------------------------|
|       |           |                                 |                               |           |       |                   |                                     |      |                                                    | 124.07588:132<br>194.08975:58                                                                                                                                                                                        |
| 6.652 | 271.10638 | His-Asp                         | [M+H] <sup>+</sup>            | 271.1037  | 9.89  | C10H14N4O5        | MDCTVRUPVLZSP<br>G-BQBZGAKWSA-N     | 60.5 | 271.10672:12385<br>272.11007:1564<br>273.11343:553 | 84.08381:64 93.04081:75<br>110.07033:431<br>132.03331:59                                                                                                                                                             |
| 5.644 | 270.11499 | His-Asn                         | [M+H] <sup>+</sup>            | 270.11969 | 17.40 | C10H15N5O4        | WSDOHLRQDGAO<br>GU-BQBZGAKWSA-<br>N | 63.4 | 270.12177:27394<br>271.12512:4294<br>272.12848:780 | 82.06399:71 83.06104:324<br>93.04528:81 94.04807:85<br>110.07228:1453<br>110.14357:59<br>110.80051:66<br>111.07226:153                                                                                               |
| 8.155 | 227.11371 | His-Ala                         | [M+H] <sup>+</sup>            | 227.11391 | 0.88  | C9H14N4O3         | FRJIAZKQGSCQPQ-<br>FSPLSTOPSA-N     | 67.6 | 227.1142:35486<br>228.11755:4826<br>229.12091:0    | 41.03847:51 55.0586:54<br>56.04946:185 58.02402:54<br>58.06385:54 59.077:56<br>81.0397:57 82.05111:53<br>83.06184:895<br>85.02838:276<br>93.04623:280 95.06351:84<br>107.07236:122<br>110.0724:1388<br>111.07381:118 |
| 5.878 | 201.11386 | Hexanoylcarnitine               | [M+H-<br>C3H9N] <sup>+</sup>  | 201.11211 | 8.70  | C13H25NO4         | VVPRQWTYSNDTE<br>A-LLVKDONJSA-N     | 64.4 | 201.11264:7032<br>202.11599:784<br>203.11935:2459  | 57.03222:258 58.06546:60<br>59.07067:112<br>85.02817:1150<br>85.70959:65 108.04447:66                                                                                                                                |
| 2.086 | 364.06693 | Guanosine 5'-<br>tetraphosphate | [M+H-<br>H3P3O9] <sup>+</sup> | 364.06531 | 4.45  | C10H17N5O17<br>P4 | KDFXXNGTULMGM<br>F-BDXYJKHTSA-N     | 60.3 | 364.06662:6992<br>365.06997:1295<br>366.07333:0    | 84.05597:52 85.08038:51<br>110.03365:82<br>135.03296:75<br>152.06119:390<br>154.07791:75                                                                                                                             |

|       |           |                                |                    |           |       |             |                                 |      |                                                       |                                                                                                                                                                                                                                                                                                                                                                                                                                              |
|-------|-----------|--------------------------------|--------------------|-----------|-------|-------------|---------------------------------|------|-------------------------------------------------------|----------------------------------------------------------------------------------------------------------------------------------------------------------------------------------------------------------------------------------------------------------------------------------------------------------------------------------------------------------------------------------------------------------------------------------------------|
| 2.349 | 364.06464 | Guanosine 5'-<br>monophosphate | [M+H] <sup>+</sup> | 364.06531 | 1.84  | C10H14N5O8P | RQFCJASXJCIDSX-<br>UUOKFMHZSA-N | 67.3 | 364.06464:61077<br>365.06799:8124<br>366.07135:1763   | 43.03066:98 55.03476:63<br>85.02755:118<br>97.02673:301<br>98.98354:214<br>109.05127:128<br>110.0334:344<br>135.03104:851<br>136.02834:51<br>137.03224:91<br>152.0558:4978<br>152.17085:134<br>152.21585:62<br>152.52007:65<br>153.05769:724<br>153.39882:61<br>187.97499:62                                                                                                                                                                 |
| 5.287 | 284.10211 | Guanosine                      | [M+H] <sup>+</sup> | 284.099   | 10.95 | C10H13N5O5  | NYHBQMYGNKIUIF<br>-UUOKFMHZSA-N | 69.7 | 284.09808:344584<br>285.10143:46117<br>286.10479:7822 | 43.02302:279<br>45.03516:124<br>55.02495:307<br>57.03563:294 61.02468:52<br>69.0334:126 71.0109:131<br>80.02468:138<br>82.03694:342<br>85.02576:132<br>109.05048:382<br>110.03483:2867<br>110.15516:51<br>111.03493:172<br>115.03145:74<br>124.04051:128<br>134.04703:140<br>135.02913:10325<br>135.12885:371<br>135.16681:215<br>135.24919:120<br>135.33034:100<br>135.37727:93 135.4594:85<br>135.57687:63<br>135.67809:57<br>135.75444:53 |



|       |           |         |                    |          |      |         |                                 |    |                                                       |                                                                                                                                                                                                                                                                                             |
|-------|-----------|---------|--------------------|----------|------|---------|---------------------------------|----|-------------------------------------------------------|---------------------------------------------------------------------------------------------------------------------------------------------------------------------------------------------------------------------------------------------------------------------------------------------|
|       |           |         |                    |          |      |         |                                 |    |                                                       | 135.89546:53                                                                                                                                                                                                                                                                                |
|       |           |         |                    |          |      |         |                                 |    |                                                       | 136.03125:765                                                                                                                                                                                                                                                                               |
|       |           |         |                    |          |      |         |                                 |    |                                                       | 136.13768:64                                                                                                                                                                                                                                                                                |
|       |           |         |                    |          |      |         |                                 |    |                                                       | 136.30804:55                                                                                                                                                                                                                                                                                |
|       |           |         |                    |          |      |         |                                 |    |                                                       | 152.05508:23770                                                                                                                                                                                                                                                                             |
|       |           |         |                    |          |      |         |                                 |    |                                                       | 152.16055:1037                                                                                                                                                                                                                                                                              |
|       |           |         |                    |          |      |         |                                 |    |                                                       | 152.20432:404                                                                                                                                                                                                                                                                               |
|       |           |         |                    |          |      |         |                                 |    |                                                       | 152.26164:225                                                                                                                                                                                                                                                                               |
|       |           |         |                    |          |      |         |                                 |    |                                                       | 152.31015:192                                                                                                                                                                                                                                                                               |
|       |           |         |                    |          |      |         |                                 |    |                                                       | 152.36873:216                                                                                                                                                                                                                                                                               |
|       |           |         |                    |          |      |         |                                 |    |                                                       | 152.41139:186                                                                                                                                                                                                                                                                               |
|       |           |         |                    |          |      |         |                                 |    |                                                       | 152.46596:156                                                                                                                                                                                                                                                                               |
|       |           |         |                    |          |      |         |                                 |    |                                                       | 152.60583:106                                                                                                                                                                                                                                                                               |
|       |           |         |                    |          |      |         |                                 |    |                                                       | 152.80431:90                                                                                                                                                                                                                                                                                |
|       |           |         |                    |          |      |         |                                 |    |                                                       | 152.91646:58                                                                                                                                                                                                                                                                                |
|       |           |         |                    |          |      |         |                                 |    |                                                       | 153.05525:2138                                                                                                                                                                                                                                                                              |
|       |           |         |                    |          |      |         |                                 |    |                                                       | 153.16151:61                                                                                                                                                                                                                                                                                |
|       |           |         |                    |          |      |         |                                 |    |                                                       | 153.19835:55                                                                                                                                                                                                                                                                                |
|       |           |         |                    |          |      |         |                                 |    |                                                       | 153.51387:66                                                                                                                                                                                                                                                                                |
|       |           |         |                    |          |      |         |                                 |    |                                                       | 153.57683:65                                                                                                                                                                                                                                                                                |
|       |           |         |                    |          |      |         |                                 |    |                                                       | 153.64877:88                                                                                                                                                                                                                                                                                |
|       |           |         |                    |          |      |         |                                 |    |                                                       | 153.89825:56                                                                                                                                                                                                                                                                                |
|       |           |         |                    |          |      |         |                                 |    |                                                       | 154.06476:160                                                                                                                                                                                                                                                                               |
|       |           |         |                    |          |      |         |                                 |    |                                                       | 155.06752:83                                                                                                                                                                                                                                                                                |
| 5.292 | 152.05641 | Guanine | [M+H] <sup>+</sup> | 152.0567 | 1.91 | C5H5N5O | UYTPUPDQBNUYG<br>X-UHFFFAOYSA-N | 70 | 152.05688:237371<br>153.06023:18635<br>154.06359:1463 | 40.01867:131 40.03873:52<br>41.01228:79 43.02972:514<br>53.01561:176<br>55.02845:701<br>65.01214:201 66.0166:100<br>68.02084:149<br>80.02293:572<br>82.03982:313 83.03162:66<br>93.0087:112 98.07881:61<br>110.03599:647<br>111.03056:56<br>134.04424:134<br>135.02986:1107<br>136.03137:68 |

|        |           |                       |                    |           |       |           |                                 |      |                                                       |                                                                                                                                                                                                                                                                                                             |
|--------|-----------|-----------------------|--------------------|-----------|-------|-----------|---------------------------------|------|-------------------------------------------------------|-------------------------------------------------------------------------------------------------------------------------------------------------------------------------------------------------------------------------------------------------------------------------------------------------------------|
| 6.456  | 60.05751  | Guanidine             | [M+H] <sup>+</sup> | 60.0556   | 31.80 | CH5N3     | ZRALSGWEFCBTJO-<br>UHFFFAOYSA-N | 63   | 60.05751:7330<br>61.06086:0<br>62.06422:0             | 43.02949:113                                                                                                                                                                                                                                                                                                |
| 13.433 | 313.20261 | Granisetron           | [M+H] <sup>+</sup> | 313.2023  | 0.99  | C18H24N4O | MFWNKCLOYSRHC<br>J-BTTYORXSA-N  | 61.2 | 313.20056:4219<br>314.20391:2392<br>315.20727:581     | 87.04014:80 97.09199:73<br>99.08094:88 120.07675:66<br>121.07221:58<br>138.11414:55<br>313.19778:173                                                                                                                                                                                                        |
| 5.169  | 175.10999 | Gly-Val               | [M+H] <sup>+</sup> | 175.1077  | 13.08 | C7H14N2O3 | STKYPAFSDFAEPH-<br>LURJTMIESA-N | 69.8 | 175.10803:50066<br>176.11138:4204<br>177.11474:524    | 55.05417:1144<br>56.05701:78 57.05716:218<br>72.08199:651 73.08213:54                                                                                                                                                                                                                                       |
| 1.091  | 258.11066 | Glycerophosphocholine | [M+H] <sup>+</sup> | 258.11011 | 2.13  | C8H20NO6P | SUHOQUVVVLNYQ<br>R-MRVPVSSYSA-N | 65.9 | 258.11066:335257<br>259.11401:44101<br>260.11737:6620 | 45.03266:272<br>45.05603:145 57.03051:58<br>58.06691:90 60.08249:543<br>61.08356:108<br>71.07455:158<br>86.09721:896 97.02742:94<br>98.98491:275<br>104.10778:1168<br>104.19907:58<br>124.99834:567<br>125.04691:55<br>166.06551:194<br>241.08054:66                                                        |
| 7.395  | 232.14178 | Gly-Arg               | [M+H] <sup>+</sup> | 232.1404  | 5.94  | C8H17N5O3 | JLXVRFDTDUGQEE-<br>YFKPBYRVSA-N | 65.4 | 232.14186:78596<br>233.14521:9826<br>234.14857:1494   | 43.02856:94 60.05642:116<br>70.06528:2136<br>70.13642:72 70.20454:81<br>71.04563:133<br>71.07093:176<br>72.07899:126 73.07016:53<br>74.01929:115 82.06812:60<br>84.04681:84 88.07806:100<br>95.06451:136<br>97.07253:152<br>98.06167:102<br>100.04993:152<br>112.0881:198<br>115.08862:102<br>116.06876:316 |

|        |           |         |                    |           |      |            |                                 |      |                                                      |                                                                                                                                                                                                                                                                     |
|--------|-----------|---------|--------------------|-----------|------|------------|---------------------------------|------|------------------------------------------------------|---------------------------------------------------------------------------------------------------------------------------------------------------------------------------------------------------------------------------------------------------------------------|
|        |           |         |                    |           |      |            |                                 |      |                                                      | 116.10046:83<br>118.92158:150<br>130.09473:93<br>137.33598:80<br>158.10027:173                                                                                                                                                                                      |
| 6.867  | 247.13098 | Glu-Val | [M+H] <sup>+</sup> | 247.1288  | 8.82 | C10H18N2O5 | SITLTJHOQZFJGG-<br>XPUUQOCRSA-N | 61   | 247.13098:55394<br>248.13433:26848<br>249.13769:4254 | 41.03991:345 44.0485:104<br>45.03361:276 50.54127:94<br>55.05345:186<br>56.04846:212<br>72.08014:973 73.07893:68<br>84.04646:1546 84.1218:68<br>84.18188:58 85.0284:687<br>85.09229:89 86.09384:281<br>102.05431:83<br>103.04166:80<br>118.08971:72<br>138.09526:80 |
| 8.665  | 311.12357 | Glu-Tyr | [M+H] <sup>+</sup> | 311.12381 | 0.77 | C14H18N2O6 | YSWHPLCDIMUKFE<br>-UHFFFAOYSA-N | 64.3 | 311.11896:12860<br>312.12231:2649<br>313.12567:0     | 70.06258:105 72.07739:55<br>84.04646:437<br>91.05109:198<br>102.05056:102<br>107.05633:54<br>119.05249:130<br>123.04681:56<br>136.07452:607<br>147.04648:141<br>148.04637:51<br>165.05522:200                                                                       |
| 13.136 | 334.1412  | Glu-Trp | [M+H] <sup>+</sup> | 334.13971 | 4.46 | C16H19N3O5 | LLEUXCDZPQOJMY<br>-DGCLKSJQSA-N | 61.5 | 334.13885:34911<br>335.1422:8984<br>336.14556:8331   | 58.9597:914 70.07027:94<br>84.04376:459<br>103.05764:58<br>125.07294:141<br>130.06125:352<br>132.07901:302<br>136.06174:606<br>136.9288:68 142.05556:60<br>144.07634:106<br>146.05405:586                                                                           |

|        |           |         |                    |           |      |            |                             |      |                                                     |                                                                                                                                                                      |
|--------|-----------|---------|--------------------|-----------|------|------------|-----------------------------|------|-----------------------------------------------------|----------------------------------------------------------------------------------------------------------------------------------------------------------------------|
|        |           |         |                    |           |      |            |                             |      |                                                     | 153.05687:57                                                                                                                                                         |
|        |           |         |                    |           |      |            |                             |      |                                                     | 159.08995:165                                                                                                                                                        |
|        |           |         |                    |           |      |            |                             |      |                                                     | 170.06252:262                                                                                                                                                        |
|        |           |         |                    |           |      |            |                             |      |                                                     | 188.06827:640                                                                                                                                                        |
|        |           |         |                    |           |      |            |                             |      |                                                     | 189.06857:130                                                                                                                                                        |
|        |           |         |                    |           |      |            |                             |      |                                                     | 204.11121:145                                                                                                                                                        |
|        |           |         |                    |           |      |            |                             |      |                                                     | 205.11774:67                                                                                                                                                         |
|        |           |         |                    |           |      |            |                             |      |                                                     | 225.09001:64                                                                                                                                                         |
| 2.23   | 249.10918 | Glu-Thr | [M+H] <sup>+</sup> | 249.10809 | 4.38 | C9H16N2O6  | JSIQVRIXMINMTA-ZURKLSA-N    | 66.1 | 249.11029:20954<br>250.11364:3819<br>251.117:0      | 56.04879:146<br>74.05983:322<br>84.04647:408<br>102.05569:200                                                                                                        |
| 5.839  | 245.11307 | Glu-Pro | [M+H] <sup>+</sup> | 245.1132  | 0.53 | C10H16N2O5 | YBTCBQBIJKGSJP-BQBZGAKWSA-N | 69.8 | 245.11432:12725<br>246.11767:0<br>247.12103:1413    | 41.03749:121<br>56.05152:143 60.07997:87<br>69.04427:50 70.06599:928<br>83.05843:58 84.04425:908<br>85.02735:150 86.09949:59<br>116.06942:231                        |
| 11.132 | 261.14667 | Glu-Ile | [M+H] <sup>+</sup> | 261.1445  | 8.31 | C11H20N2O5 | SNFUTOCQQRQD-LKEWCRSYSA-N   | 69.3 | 261.14673:41639<br>262.15008:5715<br>263.15344:1256 | 41.03879:274<br>44.04775:150<br>56.05201:626 60.07764:77<br>69.06927:93<br>84.04568:2123<br>84.11808:94 85.04731:71<br>86.09598:925<br>87.10061:190<br>102.04994:189 |
| 7.199  | 285.12115 | Glu-His | [M+H] <sup>+</sup> | 285.11929 | 6.52 | C11H16N4O5 | HKTRDWYCAUTRR-LHTQZYQBOSA-N | 63.5 | 285.121:26471<br>286.12435:4457<br>287.12771:689    | 41.03977:131<br>83.05909:131<br>84.04439:195<br>95.06108:103<br>102.05261:54<br>110.07174:1410<br>111.07235:116<br>111.10002:62<br>122.06694:99<br>150.09274:94      |

|       |           |         |                    |           |       |            |                                 |      |                                                      |                                                                                                                                                                                                         |
|-------|-----------|---------|--------------------|-----------|-------|------------|---------------------------------|------|------------------------------------------------------|---------------------------------------------------------------------------------------------------------------------------------------------------------------------------------------------------------|
|       |           |         |                    |           |       |            |                                 |      |                                                      | 156.07555:136<br>176.07863:70                                                                                                                                                                           |
| 2.205 | 205.08629 | Glu-Gly | [M+H] <sup>+</sup> | 205.08189 | 21.45 | C7H12N2O5  | LSPKYLAFTPBWIL-<br>BYPYZUCNSA-N | 61   | 205.08624:26467<br>206.08959:3081<br>207.09295:683   | 41.04083:114<br>44.04701:113 56.05045:92<br>84.043:516 100.0584:53<br>130.04588:50                                                                                                                      |
| 2.044 | 276.11841 | Glu-Gln | [M+H] <sup>+</sup> | 276.11899 | 2.10  | C10H17N3O6 | MGHKSHCBDXNTH<br>X-RITPCOANSA-N | 61.2 | 276.11841:20116<br>277.12176:2817<br>278.12512:1242  | 41.03475:56 84.04376:684<br>102.05595:131<br>130.05217:100<br>136.93048:52                                                                                                                              |
| 6.794 | 246.14828 | Gln-Val | [M+H] <sup>+</sup> | 246.14481 | 14.10 | C10H19N3O4 | MRVYVEQPNDSWL<br>H-XPUUQOCRSA-N | 65.9 | 246.14828:46366<br>247.15163:11533<br>248.15499:7213 | 41.0407:174 42.04002:105<br>54.04283:66 55.05574:163<br>56.04966:267<br>57.05791:113<br>72.08118:813 72.14898:53<br>73.08391:65 83.059:279<br>84.04378:950 85.03249:92<br>138.10158:63<br>150.90721:118 |
| 8.433 | 310.14056 | Gln-Tyr | [M+H] <sup>+</sup> | 310.13971 | 2.74  | C14H19N3O5 | KGNSGRRALVIRGR<br>-GHMZBOCLSA-N | 60.4 | 310.14056:24896<br>311.14391:5283<br>312.14727:0     | 58.96259:71 66.02991:81<br>70.06597:177 74.09541:52<br>83.06126:392<br>84.04356:583<br>101.04052:59<br>121.06618:60<br>123.03716:128<br>126.05479:92<br>136.07521:164<br>137.07098:60<br>165.05122:118  |
| 2.029 | 248.12361 | Gln-Thr | [M+H] <sup>+</sup> | 248.1241  | 1.97  | C9H17N3O5  | HHSJMSCOLJVTCX-<br>ZURKLDASA-N  | 66.3 | 248.12361:26747<br>249.12696:4282<br>250.13032:868   | 56.05303:74 74.06097:218<br>83.05859:254<br>84.04456:571 84.10503:53<br>130.04115:59                                                                                                                    |

|       |           |         |                    |           |       |             |                                 |      |                                                     |                                                                                                                                                                                                                                                                                                               |
|-------|-----------|---------|--------------------|-----------|-------|-------------|---------------------------------|------|-----------------------------------------------------|---------------------------------------------------------------------------------------------------------------------------------------------------------------------------------------------------------------------------------------------------------------------------------------------------------------|
| 1.697 | 234.10712 | Gln-Ser | [M+H] <sup>+</sup> | 234.1084  | 5.47  | C8H15N3O5   | UKKNTTCNGZLJEX-<br>WHFBIAKZSA-N | 62.6 | 234.10808:74774<br>235.11143:8724<br>236.11479:1497 | 41.04158:117<br>42.03534:121 44.0506:70<br>56.04969:738 57.03584:57<br>59.03263:108 60.04444:54<br>70.02029:62 74.02161:75<br>74.05987:243 74.09524:56<br>83.06308:189<br>84.04383:1340<br>85.04394:76 97.02712:87<br>98.05344:52 98.07432:51<br>99.03627:110<br>106.06251:56<br>116.02377:58<br>126.07051:54 |
| 5.33  | 244.13222 | Gln-Pro | [M+H] <sup>+</sup> | 244.1292  | 12.37 | C10H17N3O4  | NJMYZEJORPYOTO<br>-BQBZGAKWSA-N | 72.2 | 244.12971:64351<br>245.13306:8732<br>246.13642:1564 | 41.04075:270 43.04123:54<br>56.04984:617<br>66.03697:130 66.06216:66<br>70.06583:2164<br>70.13798:54 71.07157:122<br>83.06173:2084<br>83.13992:77<br>84.04591:2881<br>84.14259:71 85.04648:114<br>101.07277:69<br>112.04909:69<br>116.07201:632<br>117.07647:68<br>129.06572:71                               |
| 6.957 | 278.11865 | Gln-Met | [M+H] <sup>+</sup> | 278.11691 | 6.26  | C10H19N3O4S | SIGGQAHUPUBWN<br>F-BQBZGAKWSA-N | 60.3 | 278.11829:18587<br>279.12164:3169<br>280.125:1919   | 56.04816:235 83.0622:91<br>84.01028:148<br>84.04272:681<br>104.04758:58<br>111.07092:58<br>131.05141:69<br>133.02904:77<br>168.06555:69                                                                                                                                                                       |

|        |           |         |                    |           |       |            |                                   |      |                                                      |                                                                                                                                                                                                                                                                                                |
|--------|-----------|---------|--------------------|-----------|-------|------------|-----------------------------------|------|------------------------------------------------------|------------------------------------------------------------------------------------------------------------------------------------------------------------------------------------------------------------------------------------------------------------------------------------------------|
| 10.857 | 260.16385 | Gln-Leu | [M+H] <sup>+</sup> | 260.16049 | 12.92 | C11H21N3O4 | ARPVSMCNIDAQB<br>O-SFYZADRCSA-N   | 67.9 | 260.16385:111735<br>261.1672:15771<br>262.17056:2417 | 41.0393:377 54.03963:61<br>56.04977:234 66.03065:97<br>83.06116:1575<br>83.14231:53<br>84.04649:2890<br>84.10297:195 84.1244:134<br>84.17517:50 85.046:237<br>86.09641:2429<br>86.17728:83 87.09789:115<br>101.07546:114<br>120.95487:72<br>129.05998:69<br>132.10744:154<br>182.8968:70       |
| 10.111 | 260.15985 | Gln-Ile | [M+H] <sup>+</sup> | 260.16049 | 2.46  | C11H21N3O4 | XITLYYAIPBBHPX-<br>LKEWCRCRYSYA-N | 64.9 | 260.16379:33091<br>261.16714:4490<br>262.1705:906    | 41.04167:75 69.07423:79<br>83.06161:648<br>84.04572:913 84.12569:63<br>86.09602:721 142.9585:53<br>200.91179:61                                                                                                                                                                                |
| 1.809  | 204.0988  | Gln-Gly | [M+H] <sup>+</sup> | 204.0979  | 4.41  | C7H13N3O4  | JEFZIKRIHOIF-<br>BYPYZUCNSA-N     | 64.2 | 204.0988:26436<br>205.10215:2892<br>206.10551:2752   | 56.04668:261<br>58.06285:107 60.03898:88<br>70.02854:72 74.05891:54<br>83.0604:134 84.04402:899                                                                                                                                                                                                |
| 1.908  | 275.13596 | Gln-Gln | [M+H] <sup>+</sup> | 275.13501 | 3.45  | C10H18N4O5 | LOJYQMFIIJVETK-<br>RITPCOANSA-N   | 65.4 | 275.13461:51760<br>276.13796:9919<br>277.14132:1312  | 41.03949:72 56.04935:456<br>60.04222:66 70.06152:62<br>83.05966:1000<br>83.11705:62<br>84.04441:3201 84.1496:90<br>85.04705:133<br>98.06763:112<br>101.06956:135<br>102.05644:101<br>118.92493:61<br>129.0663:130<br>130.04793:496<br>131.0692:93 136.92538:62<br>167.07228:71<br>167.11072:54 |

|       |           |                   |                    |           |       |           |                                  |      |                                                     |                                                                                                                                                                                                                                     |
|-------|-----------|-------------------|--------------------|-----------|-------|-----------|----------------------------------|------|-----------------------------------------------------|-------------------------------------------------------------------------------------------------------------------------------------------------------------------------------------------------------------------------------------|
| 1.935 | 262.10623 | Gln-Asp           | [M+H] <sup>+</sup> | 262.10339 | 10.84 | C9H15N3O6 | SSHIXEILTLPAAQT-<br>WHFBIAKZSA-N | 68.5 | 262.10526:17556<br>263.10861:2622<br>264.11197:1342 | 195.06366:80<br>214.09291:104<br>41.04026:56 46.02909:291<br>56.04553:230<br>70.03162:101<br>74.02312:191<br>83.06009:227<br>84.04514:1275<br>88.03502:117<br>101.07147:105<br>116.02364:58                                         |
| 1.684 | 261.12106 | Gln-Asn           | [M+H] <sup>+</sup> | 261.11929 | 6.78  | C9H16N4O5 | DXJZITDUDUPINW-<br>WHFBIAKZSA-N  | 60.2 | 261.11951:17666<br>262.12286:3133<br>263.12622:1028 | 44.05014:73 56.05274:136<br>67.05145:100 74.02064:74<br>83.06127:258<br>84.04484:727 85.0493:91<br>87.05159:132 88.03514:62<br>96.04893:63 97.05118:53<br>98.01612:69 111.03452:71<br>113.06483:114<br>129.06851:57<br>139.05473:82 |
| 2.362 | 218.11311 | Gln-Ala           | [M+H] <sup>+</sup> | 218.11349 | 1.74  | C8H15N3O4 | FAQVCWVVIYYWR<br>R-WHFBIAKZSA-N  | 63.7 | 218.1153:33851<br>219.11865:13284<br>220.12201:1299 | 41.03738:105<br>44.04903:342<br>56.05341:177 57.03128:71<br>74.05717:99 83.06158:295<br>84.04504:793<br>101.07154:78                                                                                                                |
| 2.813 | 133.0618  | Ethylmalonic acid | [M+H] <sup>+</sup> | 133.0495  | 92.45 | C5H8O4    | UKFXDFUAPNAMP<br>J-UHFFFAOYSA-N  | 68.3 | 133.05034:3837<br>134.05369:0<br>135.05705:0        | 43.01743:124 45.03532:92                                                                                                                                                                                                            |
| 1.606 | 62.0602   | Ethanolamine      | [M+H] <sup>+</sup> | 62.06     | 3.22  | C2H7NO    | HZAXFHJVJLSVMW<br>-UHFFFAOYSA-N  | 67.2 | 62.06151:2131<br>63.06486:0<br>64.06822:0           | 42.03263:64 44.047:109<br>45.03275:220                                                                                                                                                                                              |



|       |           |                  |                    |           |       |            |                             |      |                                                       |                                                                                                                                                                                                                                                                   |
|-------|-----------|------------------|--------------------|-----------|-------|------------|-----------------------------|------|-------------------------------------------------------|-------------------------------------------------------------------------------------------------------------------------------------------------------------------------------------------------------------------------------------------------------------------|
| 1.577 | 230.09908 | Ergothioneine    | [M+H] <sup>+</sup> | 230.09579 | 14.30 | C9H15N3O2S | SSISHJTTAXXQAX-ZETCQYMHSA-N | 63.4 | 230.09891:117841<br>231.10226:17509<br>232.10562:8396 | 41.03828:276 41.0581:80<br>42.0315:77 44.05106:120<br>56.04562:103<br>58.07206:119 58.99648:65<br>60.0822:346 67.04272:156<br>68.04871:410<br>69.05673:596<br>83.05831:142 84.0546:60<br>95.061:134 96.06181:63<br>100.01946:288<br>127.03094:807<br>129.02574:74 |
| 3.95  | 130.08989 | Pipecolinic acid | [M+H] <sup>+</sup> | 130.0863  | 27.60 | C6H11NO2   | HXEACLLIILLPRG-RXMQYKEDSA-N | 69.8 | 130.08755:148219<br>131.0909:12219<br>132.09426:1065  | 41.03883:60 43.04469:56<br>55.05465:144<br>56.05154:1066<br>57.05359:123<br>67.05574:112 68.0638:79<br>69.05808:89 69.07487:65<br>82.0685:57 84.08425:1485                                                                                                        |
| 3.122 | 133.09892 | Ornithine        | [M+H] <sup>+</sup> | 133.0972  | 12.92 | C5H12N2O2  | AHLPHDHHMVZTML-SCSAIBSYSA-N | 65.4 | 133.09875:376713<br>134.1021:27532<br>135.10546:2673  | 43.01737:155<br>43.05478:716 44.0581:100<br>53.04051:121 58.06042:79<br>68.05147:173 68.08272:51<br>70.06618:7217<br>70.13803:267<br>70.16487:100 70.19067:98<br>70.26761:66 70.40656:58<br>71.06937:429                                                          |
| 1.031 | 183.08617 | Mannitol         | [M+H] <sup>+</sup> | 183.0863  | 0.71  | C6H14O6    | FBPFZTCFMRRESA-KVTDHHQDSA-N | 60.7 | 183.08617:20765<br>184.08952:3830<br>185.09288:673    | 43.01755:103<br>45.03454:110 53.04179:90<br>53.05821:55 55.05094:62<br>69.03397:576 85.0452:66                                                                                                                                                                    |

|        |           |               |                    |          |       |          |                                 |      |                                                         |                                                                                                                                                                                                                                                                                                                                                                                                                                                                                                                                                                                                                                                                                                                                                                                                                         |
|--------|-----------|---------------|--------------------|----------|-------|----------|---------------------------------|------|---------------------------------------------------------|-------------------------------------------------------------------------------------------------------------------------------------------------------------------------------------------------------------------------------------------------------------------------------------------------------------------------------------------------------------------------------------------------------------------------------------------------------------------------------------------------------------------------------------------------------------------------------------------------------------------------------------------------------------------------------------------------------------------------------------------------------------------------------------------------------------------------|
| 10.548 | 166.09119 | Phenylalanine | [M+H] <sup>+</sup> | 166.0863 | 29.44 | C9H11NO2 | COLNVLDHVKWLR<br>T-UHFFFAOYSA-N | 71.2 | 166.0881:1333788<br>167.09145:163215<br>168.09481:14318 | 42.03474:1179<br>43.01678:75 43.03901:153<br>51.02208:1113<br>55.05917:56 65.03992:133<br>67.05562:96 76.38286:55<br>77.03938:20342<br>77.11559:802<br>77.15094:345<br>77.20178:149<br>77.25059:150 77.3186:99<br>77.38604:101 77.44771:78<br>77.54799:85 77.56898:67<br>77.86478:63<br>78.04227:1578<br>78.10362:101<br>79.05401:4892<br>79.13226:155<br>80.05208:508<br>91.05418:7200<br>91.13628:246 91.17113:91<br>92.05708:911 92.11341:81<br>92.15675:54 92.97358:65<br>92.99572:61<br>93.06932:5380<br>93.15093:200 93.22125:79<br>93.35571:69 94.06966:725<br>102.04521:944<br>102.11431:89<br>103.05445:44284<br>103.14165:2159<br>103.32021:143<br>103.38673:129<br>103.45084:91<br>103.50679:101<br>103.5484:64 103.61945:68<br>103.68944:64<br>103.80278:75<br>103.83044:60<br>103.86433:69<br>103.96684:63 |
|--------|-----------|---------------|--------------------|----------|-------|----------|---------------------------------|------|---------------------------------------------------------|-------------------------------------------------------------------------------------------------------------------------------------------------------------------------------------------------------------------------------------------------------------------------------------------------------------------------------------------------------------------------------------------------------------------------------------------------------------------------------------------------------------------------------------------------------------------------------------------------------------------------------------------------------------------------------------------------------------------------------------------------------------------------------------------------------------------------|

104.05724:4785  
104.14104:145  
104.17855:104  
104.20298:68  
104.2318:108  
104.27966:76  
104.31815:78 104.3431:54  
104.45661:92  
104.79941:52  
105.06413:406  
107.04802:243  
117.04301:57  
118.06441:697  
119.07446:735 119.134:56  
120.08067:18425  
120.17595:855  
120.20832:312  
120.23794:215  
120.27816:145  
120.31069:142  
120.33701:93  
120.39368:112  
120.52249:63  
120.70444:55  
120.87624:60  
120.90711:84  
120.96819:53  
121.08163:1980  
121.17714:105  
121.2689:57

|       |           |           |                     |           |      |          |                                |      |                                                  |                                                                                      |
|-------|-----------|-----------|---------------------|-----------|------|----------|--------------------------------|------|--------------------------------------------------|--------------------------------------------------------------------------------------|
| 5.134 | 235.16628 | Norvaline | [2M+H] <sup>+</sup> | 235.16521 | 4.55 | C5H11NO2 | SNDPXYFESPGGJ-<br>UHFFFAOYSA-N | 62.3 | 235.16628:14485<br>236.16963:1497<br>237.17299:0 | 55.05645:475<br>56.05622:153<br>72.08194:2001 73.084:133<br>77.02093:71 118.08776:62 |
|-------|-----------|-----------|---------------------|-----------|------|----------|--------------------------------|------|--------------------------------------------------|--------------------------------------------------------------------------------------|

|       |          |                      |                    |          |      |          |                                    |                                                        |                                                                                                                                                                                                                                                                                                                                                                                                                                                                                                                                                                                                                                                                                                                                                                                         |
|-------|----------|----------------------|--------------------|----------|------|----------|------------------------------------|--------------------------------------------------------|-----------------------------------------------------------------------------------------------------------------------------------------------------------------------------------------------------------------------------------------------------------------------------------------------------------------------------------------------------------------------------------------------------------------------------------------------------------------------------------------------------------------------------------------------------------------------------------------------------------------------------------------------------------------------------------------------------------------------------------------------------------------------------------------|
| 18.57 | 391.2843 | Di-n-octyl phthalate | [M+H] <sup>+</sup> | 391.2843 | 0.00 | C24H38O4 | MQIUGAXCHLFZKX 65<br>-UHFFFAOYSA-N | 391.2843:554029<br>392.28765:241814<br>393.29101:39656 | 41.0392:691 42.03756:60<br>43.05401:3393<br>43.11327:139<br>57.07011:5911<br>57.13773:269 57.20073:80<br>57.28115:70 57.40414:74<br>58.07151:550<br>65.03728:1061<br>69.07258:225<br>71.08536:3375<br>71.15791:133 71.1918:67<br>71.28494:52 72.08711:250<br>79.99824:68 81.0631:71<br>84.09212:81 85.09876:184<br>93.03221:859<br>95.08604:225<br>109.10165:355<br>120.04781:872<br>121.03411:1012<br>122.04296:580<br>122.13166:51 122.3078:69<br>123.04146:155<br>124.11578:65<br>125.05145:134<br>134.05861:66<br>135.05463:57<br>136.05411:221<br>137.06097:111<br>137.08463:82<br>148.51736:57<br>149.02254:43249<br>149.12604:2414<br>149.3521:69 149.44391:58<br>149.5499:185<br>149.76646:50<br>149.90163:67<br>150.0248:4827<br>150.13521:133<br>150.17175:93<br>150.24971:56 |
|-------|----------|----------------------|--------------------|----------|------|----------|------------------------------------|--------------------------------------------------------|-----------------------------------------------------------------------------------------------------------------------------------------------------------------------------------------------------------------------------------------------------------------------------------------------------------------------------------------------------------------------------------------------------------------------------------------------------------------------------------------------------------------------------------------------------------------------------------------------------------------------------------------------------------------------------------------------------------------------------------------------------------------------------------------|

|        |           |                               |                                |           |       |            |                                     |      |                                                       |                                                                                                                                                                                                    |
|--------|-----------|-------------------------------|--------------------------------|-----------|-------|------------|-------------------------------------|------|-------------------------------------------------------|----------------------------------------------------------------------------------------------------------------------------------------------------------------------------------------------------|
|        |           |                               |                                |           |       |            |                                     |      |                                                       | 150.43715:65<br>150.68257:57<br>151.02679:428<br>151.09854:67<br>167.02771:102<br>301.20718:72<br>301.24088:54<br>316.24704:87<br>359.27805:484<br>360.26718:608<br>361.27167:107<br>374.30533:123 |
| 18.501 | 259.1839  | Dibutyl adipate               | [M+H] <sup>+</sup>             | 259.1904  | 25.08 | C14H26O4   | XTJFFFGAUHQWII-<br>UHFFFAOYSA-N     | 65.1 | 259.19446:29104<br>260.19781:6389<br>261.20117:748    | 55.05682:264<br>59.04999:103 83.05117:75<br>101.06824:143                                                                                                                                          |
| 18.57  | 149.02269 | Di(5-nonyl) phthalate         | [M+H-<br>C18H38O] <sup>+</sup> | 149.0233  | 4.09  | C26H42O4   | MGOWZWCOHIR<br>WSL-UHFFFAOYSA-<br>N | 65.4 | 149.02287:191203<br>150.02622:22685<br>151.02958:2290 | 65.03854:5502<br>65.18745:64 65.27361:59<br>66.03996:376<br>93.03266:498 94.03593:96<br>121.02664:172                                                                                              |
| 0.956  | 261.03952 | Glucose 6-phosphate           | [M+H] <sup>+</sup>             | 261.03699 | 9.69  | C6H13O9P   | NBSCHQHZLSJFNQ<br>-DVKNGEFBSA-N     | 64.4 | 261.03952:23485<br>262.04287:1793<br>263.04623:11807  | 41.04029:84 43.01881:210<br>53.04197:285 55.01805:96<br>55.05276:114 61.03508:58<br>69.03249:631<br>81.03317:201 85.0258:85<br>98.98402:571<br>109.02821:189                                       |
| 14.106 | 257.17612 | Decanoylcarnitine             | [M+H-<br>C3H9N] <sup>+</sup>   | 257.17471 | 5.48  | C17H33NO4  | LZOSYCMHQXPBF<br>U-OAHLLOKOSA-N     | 63.9 | 257.17612:1481<br>258.17947:647<br>259.18283:0        | 43.05019:133 57.0341:315<br>60.07811:113 64.97323:86<br>67.05067:92 71.0798:73<br>79.04576:71 85.0273:1154<br>168.98561:50                                                                         |
| 4.789  | 112.05256 | Cytidine 3'-<br>monophosphate | [M+H-<br>C5H9O7P] <sup>+</sup> | 112.0505  | 18.38 | C9H14N3O8P | UOOPKANIPLQP<br>U-AYZDMWBASA-<br>N  | 64.9 | 112.05181:24730<br>113.05516:1705<br>114.05852:0      | 42.03881:112<br>52.01939:143 53.01088:90<br>67.03005:144 68.016:132<br>69.0468:58 95.03182:125                                                                                                     |

|       |           |                                              |                    |           |      |            |                                     |      |                                                      |                                                                                                                                                                                                                                                                                                                                                                                 |
|-------|-----------|----------------------------------------------|--------------------|-----------|------|------------|-------------------------------------|------|------------------------------------------------------|---------------------------------------------------------------------------------------------------------------------------------------------------------------------------------------------------------------------------------------------------------------------------------------------------------------------------------------------------------------------------------|
| 1.241 | 306.0498  | Cytidine 2',3'-cyclic<br>monophosphoric acid | [M+H] <sup>+</sup> | 306.04861 | 3.89 | C9H12N3O7P | NMPZCCZXCOMSD<br>Q-XVFCMESISA-N     | 64.2 | 306.0498:8928<br>307.05315:1767<br>308.05651:0       | 69.04181:85 95.01672:77<br>112.04979:351<br>190.10344:53                                                                                                                                                                                                                                                                                                                        |
| 3.541 | 244.09483 | Cytarabine                                   | [M+H] <sup>+</sup> | 244.0928  | 8.32 | C9H13N3O5  | UHDGCWIWMRVC<br>DJ-CCXZUQQUSA-<br>N | 66.5 | 244.09317:99268<br>245.09652:21016<br>246.09988:3803 | 42.03571:79 43.02113:116<br>45.03341:131 57.0318:77<br>58.95726:53 69.04548:728<br>70.06577:1199<br>71.0188:152 85.02836:201<br>94.0386:522<br>95.02227:1301<br>96.0252:131 97.02335:79<br>112.05018:11987<br>112.14227:549<br>112.1729:218<br>112.23959:102<br>112.30194:55<br>112.36659:60<br>112.42844:120<br>112.54703:54<br>112.97548:54<br>113.04952:714<br>130.06152:101 |
| 1.364 | 193.03607 | Citric acid                                  | [M+H] <sup>+</sup> | 193.0343  | 9.17 | C6H8O7     | KRKNYBCHXYNGO<br>X-UHFFFAOYSA-N     | 65.5 | 193.03607:11396<br>194.03942:1677<br>195.04278:0     | 43.02025:120<br>68.99818:368 87.01141:71                                                                                                                                                                                                                                                                                                                                        |

|        |           |                                               |                    |           |       |            |                                 |      |                                                       |                                                                                                                                                                                                                                                                                                                                                                                                                                                                                                                                                                                                                                                                                                 |
|--------|-----------|-----------------------------------------------|--------------------|-----------|-------|------------|---------------------------------|------|-------------------------------------------------------|-------------------------------------------------------------------------------------------------------------------------------------------------------------------------------------------------------------------------------------------------------------------------------------------------------------------------------------------------------------------------------------------------------------------------------------------------------------------------------------------------------------------------------------------------------------------------------------------------------------------------------------------------------------------------------------------------|
| 2.063  | 104.10895 | Choline cation                                | [Cat] <sup>+</sup> | 104.107   | 18.73 | C5H14NO    | OEYIOHPDSNJKLS-<br>UHFFFAOYSA-N | 71.4 | 104.10857:675177<br>105.11192:43736<br>106.11528:3074 | 41.03875:77 42.03456:548<br>43.01924:588<br>43.04055:742 43.08942:61<br>43.89357:90 44.0503:8264<br>44.1107:268 44.12501:132<br>44.27557:75 44.32546:52<br>44.38646:63<br>45.03416:7227<br>45.05669:7288<br>45.13377:144<br>45.15592:130 45.2523:100<br>45.32643:52 45.34202:69<br>45.53279:54 45.56498:61<br>46.03505:247<br>46.06201:367<br>57.77559:105<br>58.06623:16328<br>58.13291:735<br>58.15948:209<br>58.18972:178<br>58.25116:148 58.30614:94<br>58.33947:97 58.37038:124<br>58.41311:95 58.60676:57<br>58.70848:84 58.77831:52<br>59.07267:1092<br>59.95829:52<br>60.08197:8081<br>60.15258:299 60.1922:100<br>60.24606:106 60.44322:76<br>60.60894:61 61.08517:453<br>104.10458:73 |
| 16.182 | 481.40359 | Bis(2,2,6,6-tetramethyl-4-piperidyl) sebacate | [M+H] <sup>+</sup> | 481.39999 | 7.48  | C28H52N2O4 | XITRBUPOXXBIJN-<br>UHFFFAOYSA-N | 61.3 | 481.40155:2259<br>482.4049:1390<br>483.40826:0        | 58.06404:104 70.06476:68<br>140.14853:78<br>481.42383:60                                                                                                                                                                                                                                                                                                                                                                                                                                                                                                                                                                                                                                        |

|        |           |              |                            |           |       |            |                                     |      |                                                        |                                                                                                                                                                                                                                                               |
|--------|-----------|--------------|----------------------------|-----------|-------|------------|-------------------------------------|------|--------------------------------------------------------|---------------------------------------------------------------------------------------------------------------------------------------------------------------------------------------------------------------------------------------------------------------|
| 1.62   | 118.08793 | Betaine      | [M+H] <sup>+</sup>         | 118.0863  | 13.80 | C5H11NO2   | KWIUHFFTVRNATP<br>-UHFFFAOYSA-N     | 67.6 | 118.08504:243641<br>119.08839:15147<br>120.09175:11439 | 42.03408:447<br>43.04286:175<br>44.04915:100<br>56.04923:372<br>58.06586:14641<br>58.13231:612<br>58.15543:247 58.21812:86<br>58.28836:122 58.33663:87<br>58.49263:63 58.64717:53<br>59.07318:1869<br>59.13165:92 59.35784:51<br>60.07726:95<br>118.08438:118 |
| 7.61   | 91.0573   | Benzylamine  | [M+H-<br>NH3] <sup>+</sup> | 91.0542   | 34.05 | C7H9N      | WGQKYBSKWIADB<br>V-UHFFFAOYSA-N     | 61.8 | 91.05577:840<br>92.05912:0<br>93.06248:0               | 50.01368:155<br>51.02243:229 63.0244:134<br>65.03983:160 91.0591:66                                                                                                                                                                                           |
| 13.224 | 171.09961 | Azelaic acid | [M+H-<br>H2O] <sup>+</sup> | 171.10159 | 11.57 | C9H16O4    | BDJRBEYXGGNYIS-<br>UHFFFAOYSA-N     | 60.1 | 171.09988:91753<br>172.10323:11618<br>173.10659:2321   | 41.03841:138 43.01415:50<br>55.01488:70 55.05226:782<br>77.66525:55 79.05151:188<br>81.06769:143<br>106.94607:77                                                                                                                                              |
| 4.643  | 231.09891 | Asp-Pro      | [M+H] <sup>+</sup>         | 231.0975  | 6.10  | C9H14N2O5  | UKGGPJNBONZZC<br>M-WDSKDSINSA-N     | 61.7 | 231.09959:26159<br>232.10294:3031<br>233.1063:1437     | 43.01849:91 70.03105:153<br>70.06531:797 70.36662:76<br>88.03994:79 96.03748:63<br>110.01502:50<br>116.07182:87<br>118.91486:76<br>125.07277:222                                                                                                              |
| 11.582 | 280.12955 | Asn-Phe      | [M+H] <sup>+</sup>         | 280.12921 | 1.21  | C13H17N3O4 | OMSMPWHEGLNQ<br>OD-NXEZZACHSA-<br>N | 63   | 280.13174:22779<br>281.13509:3922<br>282.13845:783     | 79.05785:56 87.05177:102<br>91.05677:651<br>103.05861:167<br>105.03275:50<br>119.08672:72<br>120.07878:197<br>120.12061:58<br>121.08109:64<br>128.07254:70<br>130.06567:56                                                                                    |



|        |           |         |                    |           |      |            |                                     |      |                                                        |                                                                                                                                                                                                                                                                                                                                                                                                                                                                                                                                                                                             |
|--------|-----------|---------|--------------------|-----------|------|------------|-------------------------------------|------|--------------------------------------------------------|---------------------------------------------------------------------------------------------------------------------------------------------------------------------------------------------------------------------------------------------------------------------------------------------------------------------------------------------------------------------------------------------------------------------------------------------------------------------------------------------------------------------------------------------------------------------------------------------|
|        |           |         |                    |           |      |            |                                     |      |                                                        | 145.07002:52                                                                                                                                                                                                                                                                                                                                                                                                                                                                                                                                                                                |
|        |           |         |                    |           |      |            |                                     |      |                                                        | 157.06342:51                                                                                                                                                                                                                                                                                                                                                                                                                                                                                                                                                                                |
|        |           |         |                    |           |      |            |                                     |      |                                                        | 172.07376:71                                                                                                                                                                                                                                                                                                                                                                                                                                                                                                                                                                                |
|        |           |         |                    |           |      |            |                                     |      |                                                        | 175.08238:119                                                                                                                                                                                                                                                                                                                                                                                                                                                                                                                                                                               |
|        |           |         |                    |           |      |            |                                     |      |                                                        | 182.05661:104                                                                                                                                                                                                                                                                                                                                                                                                                                                                                                                                                                               |
|        |           |         |                    |           |      |            |                                     |      |                                                        | 200.06596:64                                                                                                                                                                                                                                                                                                                                                                                                                                                                                                                                                                                |
| 4.694  | 261.15579 | Asn-Lys | [M+H] <sup>+</sup> | 261.1557  | 0.34 | C10H20N4O4 | QJMCHPGWFZZRI<br>D-RQJHMYQMSA-<br>N | 60.3 | 261.15579:97560<br>262.15914:14481<br>263.1625:1999    | 56.04981:100 57.07305:52<br>69.03332:66 84.04272:77<br>84.08104:1246<br>85.08434:104<br>136.92874:57                                                                                                                                                                                                                                                                                                                                                                                                                                                                                        |
| 11.302 | 272.17233 | Arg-Pro | [M+H] <sup>+</sup> | 272.17169 | 2.35 | C11H21N5O3 | LQJAALCCPOTJGB-<br>YUMQZZPRSA-N     | 67.5 | 272.17233:200534<br>273.17568:33084<br>274.17904:20739 | 45.03172:69 55.05301:227<br>55.07425:68 60.0564:668<br>60.09535:70 69.06297:71<br>70.06581:9073<br>70.13626:352<br>70.16325:169<br>70.18102:129 70.20921:98<br>70.26326:74 70.32092:85<br>70.41151:82 71.06641:446<br>72.08244:681 72.15953:64<br>86.09116:142<br>97.07266:113<br>98.06068:285<br>99.06406:111<br>111.53584:75<br>112.08707:1092<br>115.0916:60<br>116.06892:792<br>123.05586:83 125.0662:95<br>126.08087:71<br>128.06807:103<br>130.09401:86<br>136.92555:199<br>140.94473:52<br>151.11234:90<br>158.09207:250<br>168.09163:86<br>175.1185:280 192.1124:92<br>195.10907:56 |

|       |           |         |                    |          |       |            |                                     |      |                                                       |                                                                                                                                                                                                                                                                                                                                                                       |
|-------|-----------|---------|--------------------|----------|-------|------------|-------------------------------------|------|-------------------------------------------------------|-----------------------------------------------------------------------------------------------------------------------------------------------------------------------------------------------------------------------------------------------------------------------------------------------------------------------------------------------------------------------|
| 8.605 | 304.16095 | Arg-Glu | [M+H] <sup>+</sup> | 304.1615 | 1.81  | C11H21N5O5 | HFKJBCPRWWGPE<br>Y-RQJHMYQMSA-<br>N | 60.6 | 304.16095:100056<br>305.1643:16666<br>306.16766:2327  | 44.05063:129 60.0561:598<br>68.0497:53 70.06538:2215<br>70.15142:66 71.00961:131<br>71.0668:147 72.07726:85<br>84.03577:53 94.06208:59<br>97.07014:59 99.06023:53<br>112.08518:144<br>116.07175:127<br>117.04389:65<br>138.04837:57<br>141.07474:52<br>158.09305:123<br>175.11496:145<br>178.03564:61<br>182.07626:62<br>234.10083:52<br>240.86743:58<br>244.12387:55 |
| 2.073 | 191.10474 | Ala-Thr | [M+H] <sup>+</sup> | 191.1026 | 11.20 | C7H14N2O4  | BUQICHWNXBIBO<br>G-VAYJURFESA-N     | 67.3 | 191.10451:13561<br>192.10786:1877<br>193.11122:0      | 44.04937:622<br>56.05119:287 56.07516:51<br>74.05914:76                                                                                                                                                                                                                                                                                                               |
| 5.778 | 187.10756 | Ala-Pro | [M+H] <sup>+</sup> | 187.1077 | 0.75  | C8H14N2O3  | WPWUFUBLGADIL<br>S-WDSKDSINSA-N     | 66.9 | 187.10953:113832<br>188.11288:11037<br>189.11624:0    | 44.05093:1725<br>44.10947:62 55.05431:94<br>56.055:198 58.06825:57<br>60.07833:121 68.04849:68<br>70.06638:2849<br>70.13994:81 70.23483:62<br>71.06635:186 72.08002:75<br>84.08292:154<br>116.0675:198                                                                                                                                                                |
| 7.313 | 218.15147 | Ala-Lys | [M+H] <sup>+</sup> | 218.1499 | 7.20  | C9H19N3O3  | QXRNAOYBCYVZC<br>D-BQBZGAKWSA-N     | 63.3 | 218.15147:186773<br>219.15482:27786<br>220.15818:3664 | 42.03341:120<br>55.05449:321<br>56.05035:792<br>57.04293:227<br>67.05331:175 69.06493:97<br>72.08266:357<br>74.05797:150 79.06012:52<br>84.08139:7223                                                                                                                                                                                                                 |

|        |           |                      |                    |           |       |                  |                                 |      |                                                      |                                                                                                                                                                                                                                                            |
|--------|-----------|----------------------|--------------------|-----------|-------|------------------|---------------------------------|------|------------------------------------------------------|------------------------------------------------------------------------------------------------------------------------------------------------------------------------------------------------------------------------------------------------------------|
|        |           |                      |                    |           |       |                  |                                 |      |                                                      | 84.16237:246 84.2318:112<br>84.30962:64 84.46939:60<br>85.02954:1900<br>85.08254:858 85.15986:70<br>99.0508:118 102.93987:72<br>120.06277:86<br>130.08479:81                                                                                               |
| 7.024  | 227.11591 | Ala-His              | [M+H] <sup>+</sup> | 227.11391 | 8.81  | C9H14N4O3        | XZWXFWBHYRFLEF<br>-CAHLUQPWSA-N | 61.5 | 227.11563:44454<br>228.11898:6108<br>229.12234:0     | 44.04951:191<br>55.04314:104 58.06495:52<br>59.07487:53 68.04645:67<br>70.06631:155 82.06165:61<br>83.05821:133 84.08002:87<br>93.04707:167<br>95.05631:130 96.07832:72<br>109.07886:118<br>110.07196:828<br>114.0531:104<br>136.08746:66<br>142.08775:138 |
| 2.525  | 219.09863 | Ala-Glu              | [M+H] <sup>+</sup> | 219.0975  | 5.16  | C8H14N2O5        | VYZAGTDAHUIRQA<br>-WHFBIAKZSA-N | 63.7 | 219.09981:28422<br>220.10316:4219<br>221.10652:654   | 41.03897:181<br>44.05091:636<br>44.07492:100 44.1087:51<br>45.05235:152 45.07287:66<br>56.05095:470<br>72.05496:100<br>84.04496:2343<br>84.12881:72 84.1519:52<br>85.04359:198 90.05982:73<br>102.04807:66                                                 |
| 18.501 | 147.06157 | Adipic acid          | [M+H] <sup>+</sup> | 147.0652  | 24.68 | C6H10O4          | WNLRTBMBVRJNC<br>N-UHFFFAOYSA-N | 61   | 147.06694:11663<br>148.07029:1182<br>149.07365:0     | 43.01498:105<br>55.05598:376 55.0905:56<br>58.99448:106                                                                                                                                                                                                    |
| 3.003  | 464.07748 | Adenylosuccinic acid | [M+H] <sup>+</sup> | 464.0813  | 8.23  | C14H18N5O11<br>P | OFBHPMPBOJXRT<br>-VWJPMABRSA-N  | 69.2 | 464.07748:60017<br>465.08083:12947<br>466.08419:2598 | 97.02688:211<br>136.06487:335<br>162.07532:451<br>188.0666:132<br>192.05032:297<br>192.10524:56<br>193.05165:167                                                                                                                                           |

206.06509:216  
218.91699:56  
234.06366:345  
252.07091:2006  
252.2565:59  
253.07385:270

|       |           |                                |                    |          |       |             |                                 |      |                                                       |                                                                                                                                                                                                                                                                                                                  |
|-------|-----------|--------------------------------|--------------------|----------|-------|-------------|---------------------------------|------|-------------------------------------------------------|------------------------------------------------------------------------------------------------------------------------------------------------------------------------------------------------------------------------------------------------------------------------------------------------------------------|
| 2.533 | 348.07538 | Adenosine 3'-<br>monophosphate | [M+H] <sup>+</sup> | 348.0704 | 14.31 | C10H14N5O7P | LNQVTSROQXJCDD<br>-NYDYUERISA-N | 64.3 | 348.07416:100809<br>349.07751:13068<br>350.08087:2659 | 69.03664:135<br>85.02943:825<br>97.03049:255<br>98.98358:610<br>99.03161:121<br>109.04891:74<br>115.03648:50<br>115.95996:85<br>119.03253:63<br>136.06207:3776<br>136.16603:119<br>136.61684:51<br>136.93082:62<br>136.99942:72<br>137.06345:451<br>139.00551:70<br>152.05516:87<br>164.99751:52<br>186.07503:89 |
|-------|-----------|--------------------------------|--------------------|----------|-------|-------------|---------------------------------|------|-------------------------------------------------------|------------------------------------------------------------------------------------------------------------------------------------------------------------------------------------------------------------------------------------------------------------------------------------------------------------------|

|       |          |           |                    |         |      |            |                                 |      |                                                         |                                                                                                                                                                                                                                                                                         |
|-------|----------|-----------|--------------------|---------|------|------------|---------------------------------|------|---------------------------------------------------------|-----------------------------------------------------------------------------------------------------------------------------------------------------------------------------------------------------------------------------------------------------------------------------------------|
| 5.561 | 268.1055 | Adenosine | [M+H] <sup>+</sup> | 268.104 | 5.59 | C10H13N5O4 | OIRDTQYFTABQOQ<br>-CRKDRTNXSA-N | 67.6 | 268.10385:1128934<br>269.1072:170948<br>270.11056:21594 | 40.01914:71 41.03971:328<br>43.01797:638<br>45.03421:467<br>47.01379:104 49.02925:63<br>53.02323:60<br>55.01784:1670<br>55.08091:74 56.05357:64<br>57.03394:3068<br>57.10083:153 57.12204:53<br>59.04865:220<br>61.03109:437<br>65.01314:353<br>67.02551:119<br>69.03455:668 69.4093:53 |
|-------|----------|-----------|--------------------|---------|------|------------|---------------------------------|------|---------------------------------------------------------|-----------------------------------------------------------------------------------------------------------------------------------------------------------------------------------------------------------------------------------------------------------------------------------------|

70.02871:55 71.01457:464  
71.0676:63 73.0299:937  
73.10262:59 85.0291:1004  
86.03385:166 87.04498:75  
92.02129:293 92.04658:79  
94.03895:299  
97.02663:286  
103.03274:67  
107.04208:52  
109.04893:279  
110.07159:283  
115.03892:108  
119.03405:3660  
119.12411:137  
120.04074:168  
135.9424:73 136.00816:65  
136.06091:63383  
136.162:3714  
136.47987:199  
136.52559:133  
136.55301:145  
136.64799:216  
136.8029:178  
136.90425:60  
136.9534:103  
137.06386:5271  
137.16454:253  
137.22629:110  
137.3819:89 137.4328:62  
137.49883:66  
137.56224:65  
137.70029:74  
137.89775:59  
137.99631:61  
138.06587:181  
148.07765:50  
179.01718:56

|       |           |                                            |                    |           |       |            |                                 |      |                                                       |                                                                                                                                                                                                                  |
|-------|-----------|--------------------------------------------|--------------------|-----------|-------|------------|---------------------------------|------|-------------------------------------------------------|------------------------------------------------------------------------------------------------------------------------------------------------------------------------------------------------------------------|
| 5.557 | 136.0621  | Adenine                                    | [M+H] <sup>+</sup> | 136.0618  | 2.20  | C5H5N5     | GFFGJBXGBJISGV-<br>UHFFFAOYSA-N | 68.9 | 136.06213:95131<br>137.06548:7146<br>138.06884:0      | 40.01939:101 41.01484:60<br>55.02761:244 56.96762:55<br>62.97966:62 65.01166:188<br>67.02983:375<br>82.04419:135<br>92.02402:750 94.04395:66<br>107.04993:59<br>118.91465:149<br>119.03286:1171<br>136.05606:215 |
| 1.281 | 162.07652 | Acetylthreonine                            | [M+H] <sup>+</sup> | 162.0761  | 2.59  | C6H11NO4   | PEDXUVCGOLSNLQ<br>-WUJLRWPWSA-N | 63.2 | 162.07812:31794<br>163.08148:9534<br>164.08484:827    | 43.01676:561<br>44.05098:619 45.0314:128<br>56.05033:1530<br>56.11435:87 57.03615:131<br>74.02152:56 74.05949:697<br>75.06681:84<br>102.04979:112                                                                |
| 5.514 | 204.12708 | Acetylcarnitine                            | [M+H] <sup>+</sup> | 204.123   | 19.99 | C9H17NO4   | RDHQFKQIGNGIED<br>-UHFFFAOYSA-N | 71.8 | 204.12526:116163<br>205.12861:12933<br>206.13197:1803 | 43.01769:121<br>44.02044:127<br>57.03278:420 58.05988:67<br>59.07125:56 60.07976:345<br>61.02433:63 84.08311:241<br>85.02821:3829<br>85.13136:94 86.03353:110<br>87.03391:72                                     |
| 17.43 | 295.22955 | 9-Oxo-10(E),12(E)-<br>octadecadienoic acid | [M+H] <sup>+</sup> | 295.22681 | 9.28  | C18H30O3   | LUZSWWYKCLTDH<br>U-SIGMCMEVSA-N | 61.4 | 295.22983:3012<br>296.23318:820<br>297.23654:0        | 41.15309:68 43.05788:63<br>44.06127:96 53.03782:160<br>55.05931:135<br>67.05396:212 69.0704:214<br>71.08753:96 79.05661:91<br>81.03133:117 83.04665:53<br>91.05334:151 93.07449:84<br>95.04702:52 95.08822:103   |
| 5.932 | 298.11707 | 7-Methylguanosine                          | [M+H] <sup>+</sup> | 298.11459 | 8.32  | C11H15N5O5 | OGHAROSJZRTIOK-<br>AMKBJPJNSA-N | 64.1 | 298.11969:10973<br>299.12304:2407<br>300.1264:833     | 58.96235:96 62.95489:62<br>124.0465:69<br>149.04532:202<br>166.06943:627<br>166.12836:58                                                                                                                         |

|        |           |                                                      |                           |           |       |             |                                 |      |                                                       |                                                                                                                                                                                                                                                                                                                                                                                          |
|--------|-----------|------------------------------------------------------|---------------------------|-----------|-------|-------------|---------------------------------|------|-------------------------------------------------------|------------------------------------------------------------------------------------------------------------------------------------------------------------------------------------------------------------------------------------------------------------------------------------------------------------------------------------------------------------------------------------------|
| 4.409  | 150.077   | 7-Methyladenine                                      | [M+H] <sup>+</sup>        | 150.07739 | 2.60  | C6H7N5      | HCGHYQLFMPXSD<br>U-UHFFFAOYSA-N | 63.7 | 150.07732:3201<br>151.08067:0<br>152.08403:532        | 133.04385:97                                                                                                                                                                                                                                                                                                                                                                             |
| 10.065 | 298.10025 | 5'Methyl-5'-thioadenosine                            | [M+H] <sup>+</sup>        | 298.0968  | 11.57 | C11H15N5O3S | WUUGFSXJNOTRM<br>R-IOSLPCCCSA-N | 64.5 | 298.10028:121256<br>299.10363:20922<br>300.10699:6867 | 44.0515:69 46.99401:106<br>61.01123:1572<br>61.04769:137<br>61.06786:112 61.10787:52<br>62.01046:164<br>63.00776:138 69.03362:65<br>70.06389:374 71.00594:69<br>71.0201:55 75.02684:1113<br>92.02305:52 97.02999:91<br>117.0324:59<br>119.03566:164<br>120.03778:84<br>130.08536:54<br>136.06262:6249<br>136.16341:174<br>137.06375:334<br>137.12643:51<br>145.02806:110<br>200.92258:56 |
| 8.656  | 123.0916  | 4-Dimethylamino pyridine                             | [M+H] <sup>+</sup>        | 123.0917  | 0.81  | C7H10N2     | VHYFNPMBLIVWC<br>W-UHFFFAOYSA-N | 61.5 | 123.09377:1871<br>124.09712:0<br>125.10048:0          | 53.04094:61 79.04271:181<br>80.05378:61<br>107.05916:157                                                                                                                                                                                                                                                                                                                                 |
| 12.806 | 118.06532 | 4-Amino-5-(2-methylphenyl)-4H-1,2,4-triazole-3-thiol | [M+H-CH3N3S] <sup>+</sup> | 118.0651  | 1.86  | C9H10N4S    | CUEYNOAJNUCBA<br>P-UHFFFAOYSA-N | 66.3 | 118.06532:11594<br>119.06867:1362<br>120.07203:0      | 51.01967:74 55.04819:78<br>63.02205:79 65.03869:316<br>89.04673:53 90.04809:112<br>91.05481:193<br>102.05051:62<br>117.05379:147<br>118.06783:89                                                                                                                                                                                                                                         |
| 5.973  | 248.15283 | 3-Hydroxybutyrylcarnitine                            | [M+H] <sup>+</sup>        | 248.1492  | 14.63 | C11H21NO5   | UEFRDQSMQXDW<br>TO-YGPPZHTLSA-N | 61.7 | 248.15004:36813<br>249.15339:4718<br>250.15675:836    | 45.03076:62 57.03698:115<br>58.06511:71 59.06823:66<br>60.08194:89 69.03278:75<br>85.0285:945 86.03466:58<br>87.03619:57<br>103.03511:188                                                                                                                                                                                                                                                |

|       |           |                                                    |                               |           |       |             |                                     |      |                                                     |                                                                                                                       |
|-------|-----------|----------------------------------------------------|-------------------------------|-----------|-------|-------------|-------------------------------------|------|-----------------------------------------------------|-----------------------------------------------------------------------------------------------------------------------|
|       |           |                                                    |                               |           |       |             |                                     |      |                                                     | 103.07262:67<br>108.06875:88 152.8914:80                                                                              |
| 1.207 | 527.16382 | 3'-epi-Gemcitabine                                 | [2M+H] <sup>+</sup>           | 527.15082 | 24.66 | C9H11F2N3O4 | SDUQYLNIPVEERB-<br>NKCGXFSVSA-N     | 60   | 527.15295:828<br>528.1563:0<br>529.15966:0          | 142.94336:67<br>251.06009:60<br>527.15723:177                                                                         |
| 3.986 | 116.10984 | 3-Dehydrocarnitine                                 | [M+H-<br>CO2] <sup>+</sup>    | 116.107   | 24.46 | C7H13NO3    | YNOWULSFLVIUDH<br>-UHFFFAOYSA-N     | 65.4 | 116.10958:50874<br>117.11293:6032<br>118.11629:2126 | 58.06673:2570<br>59.07335:103                                                                                         |
| 2.506 | 129.06757 | 3-Aminopiperidine-<br>2,6-dione                    | [M+H] <sup>+</sup>            | 129.0659  | 12.94 | C5H8N2O2    | NPWMTBZSRRLQN<br>J-UHFFFAOYSA-N     | 60.2 | 129.06668:3055<br>130.07003:1607<br>131.07339:0     | 56.05083:88 83.06769:65<br>84.04422:70                                                                                |
| 1.217 | 138.05528 | 3-Acetoxypyridine                                  | [M+H] <sup>+</sup>            | 138.0549  | 2.75  | C7H7NO2     | QZDWODWEESGP<br>LC-UHFFFAOYSA-N     | 63.4 | 138.05545:6290<br>139.0588:785<br>140.06216:0       | 96.04929:60                                                                                                           |
| 1.09  | 707.22095 | 3 $\alpha$ -Mannobiose                             | [2M+Na] <sup>+</sup>          | 707.22162 | 0.95  | C12H22O11   | QIGJYVCQYDKYDW<br>-VXSGSMIHS-A-N    | 66.6 | 707.2193:913<br>708.22265:0<br>709.22601:0          | 203.0459:130<br>365.10922:652                                                                                         |
| 9.981 | 181.09032 | 3,5-Dimethyl-4-<br>methoxybenzoic acid             | [M+H] <sup>+</sup>            | 181.08591 | 24.35 | C10H12O3    | WXVQURJGDUNJC<br>S-UHFFFAOYSA-N     | 62.3 | 181.09032:1585<br>182.09367:0<br>183.09703:1312     | 137.1039:145                                                                                                          |
| 6.812 | 118.08758 | 3-(Dimethylamino)<br>propionic acid                | [M+H] <sup>+</sup>            | 118.0863  | 10.84 | C5H11NO2    | JMOXSQYGVIXBBZ-<br>UHFFFAOYSA-N     | 64.2 | 118.08797:4460<br>119.09132:0<br>120.09468:0        | 58.06451:147                                                                                                          |
| 3.126 | 155.07971 | 3-(5-Methyl-1H-<br>pyrazol-1-yl)<br>propanoic acid | [M+H] <sup>+</sup>            | 155.0815  | 11.54 | C7H10N2O2   | AVWPEIKOPXXRO<br>D-UHFFFAOYSA-N     | 66.6 | 155.08028:10662<br>156.08363:1772<br>157.08699:0    | 55.05492:98 83.05132:60                                                                                               |
| 12.81 | 146.06065 | 3-(2-Nitro-1-<br>propenyl)indole                   | [M+H-<br>C2H3NO] <sup>+</sup> | 146.06    | 4.45  | C11H10N2O2  | BPAQTDYDNBMYA<br>M-SOFGYWHQSA-<br>N | 70.4 | 146.06078:25774<br>147.06413:3315<br>148.06749:0    | 65.0404:219 90.04875:146<br>91.05293:1622<br>91.41978:62 92.0526:85<br>102.93526:53<br>117.05634:532<br>118.06472:272 |



|        |           |                                  |                                                     |           |       |                                                               |                                 |      |                                                      |                                                                                                                                                                                                                                                                                |
|--------|-----------|----------------------------------|-----------------------------------------------------|-----------|-------|---------------------------------------------------------------|---------------------------------|------|------------------------------------------------------|--------------------------------------------------------------------------------------------------------------------------------------------------------------------------------------------------------------------------------------------------------------------------------|
| 12.807 | 144.08015 | 3-(2-Hydroxyethyl)indole         | [M+H-H <sub>2</sub> O] <sup>+</sup>                 | 144.0808  | 4.51  | C <sub>10</sub> H <sub>11</sub> NO                            | MBBOMCVGYCRM<br>EA-UHFFFAOYSA-N | 62.4 | 144.08084:14984<br>145.08419:1829<br>146.08755:28516 | 65.03818:131<br>66.04118:103 72.07688:67<br>77.0368:167 84.08275:86<br>89.03759:172 90.0411:70<br>91.05473:1229<br>91.13766:70 92.05367:76<br>115.05363:204<br>116.06121:180<br>117.05844:966<br>118.06425:274<br>127.06076:79<br>142.05856:70<br>143.07124:273<br>143.1165:70 |
| 10.535 | 103.05646 | 2-Methylisoquinolin-2-ium cation | [Cat-C <sub>2</sub> H <sub>3</sub> N] <sup>+</sup>  | 103.0542  | 21.93 | C <sub>10</sub> H <sub>10</sub> N                             | ZONQVNWUCWM<br>RBX-UHFFFAOYSA-N | 63.7 | 103.05591:9921<br>104.05926:1034<br>105.06262:0      | 50.01472:100<br>51.02369:2278<br>51.09241:82 52.02427:179<br>63.02475:125<br>77.03801:786 78.04012:86                                                                                                                                                                          |
| 12.301 | 187.09679 | 2-Methylbutyryl carnitine        | [M+H-C <sub>3</sub> H <sub>9</sub> N] <sup>+</sup>  | 187.0965  | 1.55  | C <sub>12</sub> H <sub>23</sub> NO <sub>4</sub>               | IHCPDBBYTYJYL-<br>QVDQXJPCSA-N  | 67.3 | 187.09808:22684<br>188.10143:2358<br>189.10479:0     | 57.03033:147<br>57.07316:114 85.0295:500<br>91.05926:78                                                                                                                                                                                                                        |
| 6.25   | 119.03529 | 2-Methoxy-6-nitrobenzotrile      | [M+H-CH <sub>2</sub> NO <sub>2</sub> ] <sup>+</sup> | 119.0366  | 11.01 | C <sub>8</sub> H <sub>6</sub> N <sub>2</sub> O <sub>3</sub>   | ZHJPRHIYTNVTLI-<br>UHFFFAOYSA-N | 62.1 | 119.03497:1378<br>120.03832:0<br>121.04168:0         | 44.04853:50 91.05361:57<br>119.02935:101                                                                                                                                                                                                                                       |
| 10.537 | 107.04799 | 2-Hydroxybenzene methanol        | [M+H-H <sub>2</sub> O] <sup>+</sup>                 | 107.0491  | 10.37 | C <sub>7</sub> H <sub>8</sub> O <sub>2</sub>                  | CQRYARSYNCAZFO<br>-UHFFFAOYSA-N | 63.3 | 107.05102:1773<br>108.05437:0<br>109.05773:0         | 51.02343:407 52.02712:74<br>77.03863:1215<br>77.11738:58 78.0435:71<br>79.05373:78                                                                                                                                                                                             |
| 5.813  | 535.20422 | 2'-Deoxyguanosine                | [2M+H] <sup>+</sup>                                 | 535.20081 | 6.37  | C <sub>10</sub> H <sub>13</sub> N <sub>5</sub> O <sub>4</sub> | YKBGVTZYEHREMT<br>-KVQBGUIXSA-N | 63.7 | 535.20422:1551<br>536.20757:577<br>537.21093:0       | 136.06378:252<br>152.05627:1238<br>153.05487:76<br>268.10867:113<br>286.05038:54                                                                                                                                                                                               |

|        |           |                                               |                              |           |       |            |                                    |      |                                                      |                                                                                                                                                                                                                                                                                                                                                                                  |
|--------|-----------|-----------------------------------------------|------------------------------|-----------|-------|------------|------------------------------------|------|------------------------------------------------------|----------------------------------------------------------------------------------------------------------------------------------------------------------------------------------------------------------------------------------------------------------------------------------------------------------------------------------------------------------------------------------|
| 5.062  | 228.09651 | 2'-Deoxycytidine                              | [M+H] <sup>+</sup>           | 228.0979  | 6.09  | C9H13N3O4  | CKTSBUTUHBMZG<br>Z-BBVRLYRLSA-N    | 60.7 | 228.09837:8010<br>229.10172:997<br>230.10508:1150    | 43.02327:62 45.03595:180<br>67.031:105 69.04657:97<br>70.06667:355 81.03367:63<br>85.03254:53 94.03848:134<br>95.03273:54<br>112.04798:831<br>125.06149:75                                                                                                                                                                                                                       |
| 6.253  | 252.11116 | 2'-Deoxyadenosine                             | [M+H] <sup>+</sup>           | 252.1091  | 8.17  | C10H13N5O3 | OLXZPDWKRNYJJZ-<br>RRKCRQDMSA-N    | 67.8 | 252.10999:206481<br>253.11334:27993<br>254.1167:2613 | 41.04036:110 42.96753:53<br>43.01732:158<br>43.05725:699<br>45.03328:682<br>57.03307:189<br>69.03397:207 71.01754:87<br>71.04967:420<br>73.02878:513<br>81.03089:114 82.03217:83<br>92.02378:62 94.03862:69<br>99.04831:151<br>109.05415:65<br>117.05644:60<br>119.03887:413<br>120.03863:63<br>136.06284:7638<br>136.16316:209<br>136.20763:127<br>136.28909:56<br>137.0647:961 |
| 4.158  | 200.04082 | 2-Chlorophenylalanine                         | [M+H] <sup>+</sup>           | 200.0473  | 32.39 | C9H10ClNO2 | CVZZNRXMDCOHB<br>G-<br>QMMMGPBSA-N | 61.9 | 200.0425:1900<br>201.04585:0<br>202.04921:0          | 154.04236:87                                                                                                                                                                                                                                                                                                                                                                     |
| 12.807 | 142.06531 | 2-Chloro-6-methyl-3-quinoline<br>carbaldehyde | [M+H-<br>CHClO] <sup>+</sup> | 142.06509 | 1.55  | C11H8ClNO  | FSLNYYZJXMGKHK-<br>UHFFFAOYSA-N    | 63.5 | 142.06601:4120<br>143.06936:10921<br>144.07272:12079 | 65.03683:96 89.0397:279<br>91.05576:171<br>114.04163:61<br>115.05614:764<br>116.05592:161<br>117.05788:233<br>128.04944:143                                                                                                                                                                                                                                                      |

|        |           |                         |                            |          |       |          |                                 |      |                                                       |                                                                                                                                                                                                                                                                                                                                                                                                                                                                                                                          |
|--------|-----------|-------------------------|----------------------------|----------|-------|----------|---------------------------------|------|-------------------------------------------------------|--------------------------------------------------------------------------------------------------------------------------------------------------------------------------------------------------------------------------------------------------------------------------------------------------------------------------------------------------------------------------------------------------------------------------------------------------------------------------------------------------------------------------|
|        |           |                         |                            |          |       |          |                                 |      | 140.04077:71                                          |                                                                                                                                                                                                                                                                                                                                                                                                                                                                                                                          |
|        |           |                         |                            |          |       |          |                                 |      | 142.06306:208                                         |                                                                                                                                                                                                                                                                                                                                                                                                                                                                                                                          |
| 2.532  | 162.07774 | 2-Aminoadipic acid      | [M+H] <sup>+</sup>         | 162.0761 | 10.12 | C6H11NO4 | OYIFNHXCNCRBQI-<br>UHFFFAOYSA-N | 68.9 | 162.07774:218313<br>163.08109:18768<br>164.08445:3095 | 43.01956:166<br>43.05523:105 44.0512:110<br>55.01938:2267<br>55.11752:65 55.13005:53<br>56.05175:1178<br>56.11504:65 57.03223:87<br>57.04977:64 60.0825:174<br>70.06558:991<br>71.06922:228<br>73.02708:118<br>98.06738:283 99.03069:52<br>102.09259:57                                                                                                                                                                                                                                                                  |
| 10.536 | 120.08222 | 2-Amino-1-phenylethanol | [M+H-<br>H2O] <sup>+</sup> | 120.0808 | 11.83 | C8H11NO  | ULSIYEODSMZIPX-<br>UHFFFAOYSA-N | 71.1 | 120.08195:660092<br>121.0853:61484<br>122.08866:2888  | 42.03566:240 43.04646:68<br>51.02472:3061<br>51.07156:184<br>51.08597:112<br>52.02799:278 53.03861:80<br>63.02896:67<br>65.03995:1291<br>65.12964:68 66.04427:263<br>75.02605:92<br>77.04025:12215<br>77.11751:422<br>77.13998:178<br>77.16566:153 77.22078:95<br>77.26369:86 77.34902:70<br>77.43271:78 77.50092:56<br>77.52402:72 77.63527:64<br>78.043:1178 78.10303:75<br>78.27956:96 79.04181:97<br>80.04783:71<br>91.05527:2753<br>91.14136:111<br>92.05933:335<br>101.03669:55<br>102.04889:420<br>103.05636:1813 |

|        |           |                                                  |                    |           |       |            |                                    |      |                                                    |                                                                                                                 |
|--------|-----------|--------------------------------------------------|--------------------|-----------|-------|------------|------------------------------------|------|----------------------------------------------------|-----------------------------------------------------------------------------------------------------------------|
|        |           |                                                  |                    |           |       |            |                                    |      |                                                    | 103.12616:105<br>103.18754:59<br>103.52067:72<br>104.05386:226<br>118.06842:238<br>119.0735:208<br>120.07751:64 |
| 16.177 | 306.24362 | 2,6-Di-tert-butyl-4-(4-morpholinylmethyl) phenol | [M+H] <sup>+</sup> | 306.2428  | 2.68  | C19H31NO2  | KWGUJRCPPGSTK<br>B-UHFFFAOYSA-N    | 61.6 | 306.24551:2779<br>307.24886:1457<br>308.25222:520  | 160.08385:126<br>174.19106:60<br>178.13605:62<br>219.17418:430<br>306.23523:63                                  |
| 5.088  | 124.08698 | 2,5-Dimethyl-4-pyrimidinamine                    | [M+H] <sup>+</sup> | 124.0869  | 0.64  | C6H9N3     | UXKNAXNFIYFMIB-<br>UHFFFAOYSA-N    | 64.3 | 124.08698:10621<br>125.09033:1239<br>126.09369:628 | 56.04979:185                                                                                                    |
| 5.933  | 166.07454 | 2,3,4,5-Tetrahydro-1,4-benzothiazepine           | [M+H] <sup>+</sup> | 166.0685  | 36.37 | C9H11NS    | SUBDEKBXSIKCSA-<br>UHFFFAOYSA-N    | 61.7 | 166.0731:3290<br>167.07645:546<br>168.07981:0      | 166.07158:65                                                                                                    |
| 7.677  | 114.10464 | 1-Pyrrolidine carboximidamide                    | [M+H] <sup>+</sup> | 114.1026  | 17.88 | C5H11N3    | PIGIRWPZTWLVLB-<br>UHFFFAOYSA-N    | 63.3 | 114.10526:4405<br>115.10861:0<br>116.11197:0       | 55.03326:111 72.08109:78                                                                                        |
| 6.143  | 126.06586 | 1-Methylcytosine                                 | [M+H] <sup>+</sup> | 126.0662  | 2.70  | C5H7N3O    | HWPZZUQQRWF<br>DB-UHFFFAOYSA-<br>N | 61.4 | 126.0648:5048<br>127.06815:829<br>128.07151:0      | 109.07303:85                                                                                                    |
| 4.414  | 282.12064 | 1-Methyladenosine                                | [M+H] <sup>+</sup> | 282.11969 | 3.37  | C11H15N5O4 | GFYLSDSUCHVORB<br>-FCKMSMMTSA-N    | 60.3 | 282.11935:29791<br>283.1227:4366<br>284.12606:1221 | 58.96109:95 94.03983:68<br>133.05186:74<br>150.0768:1769<br>150.19096:50                                        |
| 2.265  | 130.08502 | 1-Aminocyclopentanecarboxylic acid               | [M+H] <sup>+</sup> | 130.0863  | 9.84  | C6H11NO2   | NILQLFBWTXNUOE<br>-UHFFFAOYSA-N    | 63.3 | 130.08286:6150<br>131.08621:0<br>132.08957:1169    | 84.08155:162                                                                                                    |

|        |           |                                       |                         |           |       |             |                                 |      |                                                      |                                                                                                                                                                                                                                                   |
|--------|-----------|---------------------------------------|-------------------------|-----------|-------|-------------|---------------------------------|------|------------------------------------------------------|---------------------------------------------------------------------------------------------------------------------------------------------------------------------------------------------------------------------------------------------------|
| 6.829  | 153.14049 | 1,8-Diazabicyclo[5.4.0]undec-7-ene    | [M+H] <sup>+</sup>      | 153.1386  | 12.34 | C9H16N2     | GQHTUMJGOHRC<br>HB-UHFFFAOYSA-N | 65.1 | 153.14049:60211<br>154.14384:6145<br>155.1472:0      | 42.03424:126<br>44.05118:404 55.0559:372<br>68.04631:124 69.0724:226<br>96.0815:821 96.12801:84<br>97.08769:131<br>98.08232:227<br>109.07035:74<br>111.0938:248<br>124.09325:63<br>125.1088:476<br>125.35406:72<br>153.14088:1249<br>153.21458:98 |
| 18.57  | 279.15826 | 1,4-Dibutyl benzene-1,4-dicarboxylate | [M+H] <sup>+</sup>      | 279.15909 | 2.97  | C16H22O4    | LQLQDKBJAILIQ-<br>UHFFFAOYSA-N  | 62.7 | 279.15811:55236<br>280.16146:13723<br>281.16482:1557 | 43.05769:75 57.07237:104<br>65.04001:95<br>121.02625:157<br>149.01993:744<br>150.02637:109                                                                                                                                                        |
| 12.683 | 72.08189  | 1,2-Diamino-2-methylpropane           | [M+H-NH3] <sup>+</sup>  | 72.0808   | 15.12 | C4H12N2     | OPCJOXGBLDJWR<br>M-UHFFFAOYSA-N | 62.1 | 72.08189:14490<br>73.08524:793<br>74.0886:3386       | 42.03323:158<br>55.05378:127<br>56.04852:163 57.05719:86                                                                                                                                                                                          |
| 12.809 | 143.07385 | 1-(4-Methoxyphenyl)-1H-pyrrole        | [M+H-CH3O] <sup>+</sup> | 143.073   | 5.94  | C11H11NO    | WYFMHHMFUMB<br>CGI-UHFFFAOYSA-N | 61.2 | 143.07452:9092<br>144.07787:11398<br>145.08123:1006  | 65.03796:254 89.03989:69<br>90.04705:176<br>91.05525:510 91.11145:54<br>101.04967:77<br>115.05867:654<br>116.05891:125<br>117.06125:395<br>118.06359:156<br>142.07558:83<br>143.07593:277                                                         |
| 1.247  | 335.06573 | β-Nicotinamide mononucleotide         | [M+H] <sup>+</sup>      | 335.0639  | 5.46  | C11H15N2O8P | DAYLJWODMCOQE<br>W-TURQNECASA-N | 67.5 | 335.06332:17608<br>336.06667:2171<br>337.07003:627   | 53.03657:62 80.04749:53<br>97.02915:454<br>98.03485:106<br>106.02593:59<br>123.0554:1022                                                                                                                                                          |

|       |           |                                      |                                                        |           |       |                                                               |                                  |      |                                                       |                                                                                                                                                                                                                                                                                                                                                                                                                                                                                                                                                                                                                                                        |
|-------|-----------|--------------------------------------|--------------------------------------------------------|-----------|-------|---------------------------------------------------------------|----------------------------------|------|-------------------------------------------------------|--------------------------------------------------------------------------------------------------------------------------------------------------------------------------------------------------------------------------------------------------------------------------------------------------------------------------------------------------------------------------------------------------------------------------------------------------------------------------------------------------------------------------------------------------------------------------------------------------------------------------------------------------------|
| 7.408 | 148.06039 | $\alpha$ -Guanidino<br>glutaric acid | [M+H-<br>CH <sub>2</sub> N <sub>2</sub> ] <sup>+</sup> | 148.06039 | 0.00  | C <sub>6</sub> H <sub>11</sub> N <sub>3</sub> O <sub>4</sub>  | RHVVRMJOHATSP<br>D-VKHKMYHEASA-N | 66.2 | 148.06284:1378<br>149.06619:0<br>150.06955:0          | 56.05594:107 84.04668:96<br>84.07423:77                                                                                                                                                                                                                                                                                                                                                                                                                                                                                                                                                                                                                |
| 9.833 | 232.15805 | Butyrylcarnitine                     | [M+H] <sup>+</sup>                                     | 232.1543  | 16.15 | C <sub>11</sub> H <sub>21</sub> N <sub>1</sub> O <sub>4</sub> | QWYFHHGCZUCM<br>BN-SECBINFHSA-N  | 67.3 | 232.15556:645202<br>233.15891:87798<br>234.16227:9953 | 41.03886:88 43.01789:138<br>43.05596:1701<br>43.11219:74 44.0595:54<br>44.99747:229<br>57.03373:2134<br>58.03433:139<br>58.06579:107 58.10399:66<br>59.07047:315<br>60.08087:1675<br>60.12778:91 60.15114:97<br>71.05275:288<br>84.08148:412<br>85.02922:24172<br>85.10889:948<br>85.14163:358<br>85.20018:244<br>85.27773:124<br>85.34407:112 85.40762:85<br>85.49803:88 85.59771:79<br>85.64507:60 85.66129:52<br>85.7021:101<br>86.03175:1216<br>86.09203:101 86.14253:73<br>86.19368:60 86.44883:51<br>87.03429:142<br>89.05507:142 98.0927:71<br>102.08495:75<br>118.92081:184<br>129.07545:118<br>136.93018:160<br>144.09734:289<br>155.02859:73 |

|       |           |                                                     |                     |           |       |            |                                 |      |                                                     |                                                                                      |
|-------|-----------|-----------------------------------------------------|---------------------|-----------|-------|------------|---------------------------------|------|-----------------------------------------------------|--------------------------------------------------------------------------------------|
| 7.613 | 119.05521 | (4-Bromo-1H-pyrazol-1-yl)(3-methylphenyl) methanone | [M+H-C3H3BrN2]<br>+ | 119.0491  | 51.32 | C11H9BrN2O | WACJMZOPBBWB<br>AJ-UHFFFAOYSA-N | 65.5 | 119.05193:10313<br>120.05528:1008<br>121.05864:1240 | 65.03879:123<br>91.05412:263 94.05945:65                                             |
| 7.677 | 131.13237 | (4-Aminobutyl) guanidine                            | [M+H] <sup>+</sup>  | 131.1291  | 24.94 | C5H14N4    | QYPPJABKJHAVHS-<br>UHFFFAOYSA-N | 68   | 131.13141:36984<br>132.13476:3160<br>133.13812:0    | 43.02907:81 55.05174:177<br>60.05598:130<br>72.08193:490                             |
| 2.923 | 146.11781 | (3-Carboxypropyl) trimethylammonium cation          | [Cat] <sup>+</sup>  | 146.1176  | 1.44  | C7H16NO2   | JHPNVNIEXLNTR-<br>UHFFFAOYSA-O  | 69.1 | 146.11781:51246<br>147.12116:4635<br>148.12452:699  | 41.03719:140<br>43.01712:391 44.04644:75<br>45.03236:954 58.06423:62<br>60.08135:209 |
| 7.182 | 262.16794 | 3-Hydroxyisovaleroyl carnitine                      | [M+H] <sup>+</sup>  | 262.16489 | 11.63 | C12H23NO5  | IGLHHSKNBDXCEY-<br>SECBINFHSA-N | 66.1 | 262.1676:94229<br>263.17095:15200<br>264.17431:2175 | 57.0364:80 59.04953:574<br>60.04723:71 60.08307:124<br>85.02923:2374<br>86.03703:85  |

---

**Table 2S.** LC/MS Q-TOF raw data file: area values obtained from the analysis of twelve *P. ostreatus* samples, six grown on WS substrate (WS 1-6) and six on the LcS substrate (LcS 1-6).

| Sample                                             | WS 1   | WS 2   | WS 3   | WS 4   | WS 5   | WS 6   | LcS 1  | LcS 2  | LcS 3  | LcS 4  | LcS 5  | LcS 6  |
|----------------------------------------------------|--------|--------|--------|--------|--------|--------|--------|--------|--------|--------|--------|--------|
| 3-Hydroxyisovalerylcarnitine                       | 720889 | 619195 | 554704 | 806898 | 716103 | 666282 | 78008  | 70289  | 612878 | 500149 | 483471 | 433273 |
| (3-Carboxypropyl)trimethylammonium cation          | 141897 | 375238 | 447296 | 153594 | 191995 | 239755 | 0.0053 | 0.0041 | 0.0034 | 0.0016 | 0.0052 | 0.0047 |
| (4-Aminobutyl)guanidine                            | 0      | 0      | 0      | 191597 | 208628 | 21704  | 278703 | 44954  | 482583 | 3403   | 683332 | 57161  |
| (4-Bromo-1H-pyrazol-1-yl)(3-methylphenyl)methanone | 0.0073 | 0.0087 | 0.0083 | 0.0082 | 0.0079 | 0.0079 | 0.0089 | 0.0094 | 102102 | 0.0081 | 0.0094 | 0.0094 |
| Butyrylcarnitine                                   | 1E+07  | 1E+06  | 1E+07  | 4E+06  | 439899 | 4E+06  | 2E+07  | 2E+07  | 2E+07  | 1E+07  | 1E+07  | 1E+07  |
| $\alpha$ -Guanidinoglutaric acid                   | 0.0013 | 0.0012 | 0.0012 | 0.0008 | 0.0009 | 0.0008 | 0.0012 | 0.0011 | 0.001  | 0.0012 | 0.0011 | 0.0012 |
| $\beta$ -Nicotinamide mononucleotide               | 0.0083 | 0.0041 | 0.003  | 148683 | 0.0095 | 0.0024 | 15602  | 142617 | 13831  | 0.0099 | 0.0093 | 108851 |
| 1-(4-Methoxyphenyl)-1H-pyrrole                     | 0.0074 | 0.009  | 0.0095 | 0.0078 | 0.0083 | 0.0083 | 101111 | 106227 | 107783 | 0.0095 | 1038   | 101026 |
| 1,2-Diamino-2-methylpropane                        | 225262 | 2E+06  | 2E+06  | 2E+06  | 2E+06  | 2E+06  | 3E+06  | 3E+06  | 3E+06  | 3E+06  | 27498  | 3E+06  |
| 1,4-Dibutyl benzene-1,4-dicarboxylate              | 484346 | 467875 | 258227 | 710206 | 302028 | 310376 | 590551 | 276575 | 266668 | 656785 | 277908 | 296264 |
| 1,8-Diazabicyclo[5.4.0]undec-7-ene                 | 6E+06  | 4E+06  | 3E+06  | 4E+06  | 372124 | 4E+06  | 4E+06  | 3E+06  | 3E+06  | 3696   | 3E+06  | 319894 |
| 1-Aminocyclopentanecarboxylic acid                 | 0.0005 | 0.0001 | 0.0001 | 0.0016 | 0.0016 | 0.0015 | 0.0025 | 0.0024 | 0.0023 | 0.0064 | 0.0054 | 0.0051 |
| 1-Methyladenosine                                  | 227912 | 252734 | 258458 | 159916 | 147408 | 156685 | 601333 | 54235  | 537014 | 3429   | 338538 | 37022  |
| 1-Methylcytosine                                   | 0.0056 | 0.0057 | 0.0053 | 0.0034 | 0.0029 | 0.0031 | 0.0042 | 0.0041 | 0.0034 | 0.0049 | 0.0044 | 0.0053 |
| 1-Pyrrolidinecarboximidamide                       | 0.0003 | 0.0001 | 0.0003 | 0.0012 | 0.0016 | 0.0018 | 0.0019 | 0.003  | 0.0036 | 0.0025 | 0.0049 | 0.004  |
| 2,3,4,5-Tetrahydro-1,4-benzothiazepine             | 0.0036 | 0.0045 | 0.0046 | 0.0028 | 0.003  | 0.0036 | 0.0068 | 0.008  | 0.0085 | 0.0052 | 0.0059 | 0.0069 |
| 2,5-Dimethyl-4-pyrimidinamine                      | 0.0012 | 0.0011 | 0.0011 | 0.0014 | 0.0013 | 0.0012 | 0.0025 | 0.0023 | 0.0021 | 0.0081 | 0.0074 | 0.0063 |
| 2,6-Di-tert-butyl-4-(4-morpholinylmethyl)phenol    | 0.0028 | 0.0029 | 0.0028 | 0.0032 | 0.003  | 0.0029 | 0.0021 | 0.0025 | 0.0023 | 0.0022 | 0.0026 | 0.0028 |
| 2-Amino-1-phenylethanol                            | 4E+06  | 44751  | 5E+06  | 4E+06  | 425238 | 4E+06  | 5E+06  | 5E+06  | 5E+06  | 5E+06  | 526243 | 5E+06  |
| 2-Aminoadipic acid                                 | 248136 | 108877 | 0.0001 | 152033 | 101886 | 235944 | 2E+06  | 2E+06  | 1E+06  | 1E+06  | 1E+06  | 1E+06  |
| 2-Chloro-6-methyl-3-quinolinecarbaldehyde          | 0.0034 | 0.0036 | 0.0042 | 0.0034 | 0.0037 | 0.0038 | 0.0042 | 0.0046 | 0.0047 | 0.004  | 0.0048 | 0.0045 |
| 2-Chlorophenylalanine                              | 0.0006 | 0.0003 | 0.0003 | 0.0005 | 0.0007 | 0.0005 | 0.0021 | 0.0017 | 0.0017 | 0.0014 | 0.0018 | 0.0016 |



|                                                      |        |        |        |        |        |        |        |        |        |        |        |        |
|------------------------------------------------------|--------|--------|--------|--------|--------|--------|--------|--------|--------|--------|--------|--------|
| 2'-Deoxyadenosine                                    | 2E+06  | 2E+06  | 171637 | 129731 | 1E+06  | 1E+06  | 2E+06  | 2E+06  | 2E+06  | 1E+06  | 2E+06  | 2E+06  |
| 2'-Deoxycytidine                                     | 100469 | 0.0081 | 0.0097 | 0.0063 | 0.0057 | 0.0056 | 0.0032 | 0.0035 | 0.0039 | 0.0085 | 0.0096 | 0.0083 |
| 2'-Deoxyguanosine                                    | 0.0006 | 0.0006 | 0.0006 | 0.0001 | 0      | 0      | 0.0012 | 0.0009 | 0.0009 | 0.0006 | 0.0009 | 0.0007 |
| 2-Hydroxybenzenemethanol                             | 0.0017 | 0.0018 | 0.0017 | 0.0015 | 0.0015 | 0.0018 | 0.0022 | 0.0021 | 0.002  | 0.0021 | 0.0021 | 0.002  |
| 2-Methoxy-6-nitrobenzonitrile                        | 0.0011 | 0.0009 | 0.001  | 0.0008 | 0.0008 | 0.0007 | 0.0011 | 0.0013 | 0.0011 | 0.0009 | 0.0011 | 0.0011 |
| 2-Methylbutyrylcarnitine                             | 175505 | 19142  | 197997 | 0.0047 | 0.0047 | 0.0049 | 153529 | 170119 | 166223 | 100699 | 117227 | 114028 |
| 2-Methylisoquinolin-2-ium cation                     | 0.0074 | 0.008  | 0.0087 | 0.0074 | 0.0075 | 0.0072 | 0.0093 | 0.0097 | 0.0094 | 0.0092 | 0.0098 | 0.0093 |
| 3-(2-Hydroxyethyl)indole                             | 0.0094 | 107182 | 11114  | 0.0092 | 0.01   | 0.0099 | 120803 | 128373 | 125092 | 117421 | 127655 | 125236 |
| 3-(2-Nitro-1-propenyl)indole                         | 171943 | 189699 | 193529 | 171536 | 18084  | 174767 | 205894 | 228282 | 216416 | 201023 | 219851 | 215416 |
| 3-(5-Methyl-1H-pyrazol-1-yl)propanoic acid           | 0.0082 | 0.0081 | 0.0077 | 113414 | 107604 | 10175  | 150489 | 150486 | 160054 | 0.0099 | 103423 | 102271 |
| 3-(Dimethylamino)propionic acid                      | 0.003  | 0.0031 | 0.0034 | 0.003  | 0.0035 | 0.0034 | 0.0034 | 0.0031 | 0.0032 | 0.0031 | 0.0035 | 0.0033 |
| 3,5-Dimethyl-4-methoxybenzoic acid                   | 0      | 0      | 0      | 0.0003 | 0.0002 | 0.0003 | 0      | 0      | 0      | 0.0012 | 0.001  | 0.0013 |
| 3 $\alpha$ -Mannobiose                               | 0.0011 | 0.0003 | 0.0002 | 0.0001 | 0.0001 | 0.0001 | 0.0005 | 0.0007 | 0.0004 | 0.0004 | 0.0003 | 0.0001 |
| 3-Acetoxy pyridine                                   | 0.0064 | 0.0061 | 0.0055 | 0.0023 | 0.0023 | 0.0018 | 0.0036 | 0.0041 | 0.004  | 0.0052 | 0.0049 | 0.0065 |
| 3-Aminopiperidine-2,6-dione                          | 0.0013 | 0.0016 | 0.0014 | 0.0027 | 0.0025 | 0.0028 | 0.0024 | 0.0025 | 0.0024 | 0.0062 | 0.0066 | 0.0068 |
| 3-Dehydrocarnitine                                   | 267983 | 207442 | 193859 | 117837 | 119367 | 148255 | 1E+06  | 1E+06  | 10456  | 129638 | 121011 | 1E+06  |
| 3'-epi-Gemcitabine                                   | 1E+06  | 1E+06  | 1E+06  | 1E+06  | 1E+06  | 1E+06  | 461587 | 336933 | 237192 | 954085 | 628355 | 617801 |
| 3-Hydroxybutyrylcarnitine                            | 1E+06  | 1E+06  | 1E+06  | 2E+06  | 2E+06  | 183401 | 613169 | 584045 | 50633  | 131321 | 1E+06  | 1E+06  |
| 4-Amino-5-(2-methylphenyl)-4H-1,2,4-triazole-3-thiol | 0.0066 | 0.0081 | 0.0079 | 0.0066 | 0.0072 | 0.0075 | 0.0087 | 0.0094 | 0.0089 | 0.008  | 0.0087 | 0.0092 |
| 4-Dimethylaminopyridine                              | 0.0019 | 0.002  | 0.0015 | 0.0021 | 0.0016 | 0.0016 | 0.0017 | 0.0017 | 0.0014 | 0.0014 | 0.0015 | 0.0015 |
| 5'-Methyl-5'-thioadenosine                           | 102462 | 1E+06  | 1E+06  | 224828 | 223693 | 194815 | 726774 | 746603 | 626232 | 172706 | 172923 | 149879 |
| 7-Methyladenine                                      | 0.0025 | 0.0025 | 0.0027 | 0.0017 | 0.0017 | 0.0015 | 0.0064 | 0.006  | 0.0056 | 0.0043 | 0.0041 | 0.0044 |
| 7-Methylguanosine                                    | 0.0084 | 0.01   | 10311  | 0.0056 | 0.0066 | 0.0072 | 16472  | 189884 | 200602 | 115938 | 122341 | 154391 |
| 9-Oxo-10(E),12(E)-octadecadienoic acid               | 0.0007 | 0.0016 | 0.0015 | 0.0024 | 0.0025 | 0.0028 | 0.0024 | 0.0026 | 0.0027 | 0.0031 | 0.0036 | 0.0035 |
| Acetylcarnitine                                      | 9E+06  | 8E+06  | 8E+06  | 1E+07  | 1E+07  | 1E+07  | 6E+06  | 6E+06  | 6E+06  | 502437 | 494142 | 5E+06  |
| Acetylthreonine                                      | 0.0039 | 0.0029 | 0.0028 | 0.0021 | 0.002  | 0.0024 | 230008 | 265334 | 259869 | 165642 | 155699 | 154671 |
| Adenine                                              | 727792 | 727553 | 701218 | 651649 | 591415 | 605258 | 737909 | 759391 | 721212 | 710003 | 747236 | 755755 |
| Adenosine                                            | 1E+07  | 1E+07  | 1E+07  | 9E+06  | 8E+06  | 8E+06  | 1E+07  | 1E+07  | 1E+07  | 1E+07  | 1E+07  | 1E+07  |
| Adenosine 3'-monophosphate                           | 1E+06  | 109841 | 879908 | 1E+06  | 1E+06  | 1E+06  | 505853 | 417891 | 327047 | 774629 | 682876 | 583984 |
| Adenylosuccinic acid                                 | 166541 | 139744 | 139979 | 448216 | 4214   | 551091 | 229997 | 216827 | 166362 | 171    | 176681 | 178502 |
| Adipic acid                                          | 150929 | 15052  | 0.0098 | 210834 | 102766 | 104825 | 181568 | 0.0096 | 0.0089 | 20292  | 0.0099 | 101919 |
| Ala-Glu                                              | 308378 | 294224 | 248079 | 209458 | 216481 | 248304 | 341883 | 30314  | 288342 | 215716 | 203813 | 238321 |
| Ala-His                                              | 344295 | 376545 | 38156  | 41497  | 406572 | 391892 | 213413 | 21728  | 22052  | 226673 | 24983  | 198756 |

|                                               |        |        |        |        |        |        |        |        |        |        |        |        |
|-----------------------------------------------|--------|--------|--------|--------|--------|--------|--------|--------|--------|--------|--------|--------|
| Ala-Lys                                       | 2E+06  | 2E+06  | 4E+06  | 404072 | 408042 | 4E+06  | 2E+06  | 2E+06  | 3E+06  | 2E+06  | 2E+06  | 181072 |
| Ala-Pro                                       | 1E+06  | 992316 | 993574 | 819749 | 836659 | 863446 | 133852 | 100028 | 0.0089 | 0.0086 | 0.0078 | 0.007  |
| Ala-Thr                                       | 179187 | 112109 | 118365 | 0.0093 | 0.0096 | 0.01   | 0.0058 | 0.0044 | 0.0048 | 0.0045 | 0.0057 | 0.0044 |
| Arg-Glu                                       | 765467 | 758634 | 691261 | 653957 | 62376  | 556807 | 510812 | 360137 | 26061  | 615933 | 507989 | 372845 |
| Arg-Pro                                       | 2E+06  | 2E+06  | 2E+06  | 135611 | 1E+06  | 1E+06  | 0.0097 | 0.0072 | 0.0062 | 0.0089 | 0.0091 | 0.0052 |
| Asn-Lys                                       | 265563 | 212037 | 175417 | 0.0093 | 0.0068 | 0.0054 | 639507 | 581626 | 530777 | 623369 | 771488 | 556757 |
| Asn-Phe                                       | 200441 | 198342 | 198824 | 198638 | 208862 | 18469  | 0.0033 | 0.0023 | 0.0018 | 0.0068 | 0.0047 | 0.0031 |
| Asp-Pro                                       | 229771 | 221577 | 238767 | 175092 | 187355 | 219397 | 176773 | 15986  | 160421 | 104898 | 124056 | 111972 |
| Azelaic acid                                  | 224723 | 302901 | 718082 | 764828 | 836001 | 8425   | 0.0037 | 0.0065 | 0.0074 | 0.0063 | 0.0077 | 0.009  |
| Benzylamine                                   | 0.0008 | 0.0009 | 0.0008 | 0.0008 | 0.0007 | 0.0008 | 0.001  | 0.0011 | 0.0009 | 0.001  | 0.0009 | 0.001  |
| Betaine                                       | 198934 | 151935 | 127522 | 395801 | 313168 | 543076 | 7E+06  | 8E+06  | 7E+06  | 6E+06  | 8E+06  | 7E+06  |
| Bis(2,2,6,6-tetramethyl-4-piperidyl) sebacate | 0.0016 | 0.0022 | 0.0035 | 0.001  | 0.0022 | 0.0015 | 0.0017 | 0.0016 | 0.0012 | 0.0007 | 0.001  | 0.001  |
| Choline cation                                | 4E+06  | 6E+06  | 6E+06  | 6E+06  | 6E+06  | 5E+06  | 1E+07  | 1E+06  | 1E+07  | 1E+07  | 1E+07  | 1E+07  |
| Citric acid                                   | 0.0043 | 0.003  | 0.002  | 0.003  | 0.0022 | 0.0021 | 0.0023 | 0.0029 | 0.0024 | 0.0079 | 0.009  | 0.0065 |
| Cytarabine                                    | 2E+06  | 1E+06  | 1E+06  | 224958 | 2E+06  | 2E+06  | 530761 | 351485 | 229851 | 2E+06  | 1E+06  | 105583 |
| Cytidine 2',3'-cyclic monophosphoric acid     | 0.0068 | 0.0032 | 0.0014 | 0.0013 | 0.0002 | 0.0001 | 0.0017 | 0.0014 | 0.0011 | 0.0057 | 0.0032 | 0.0009 |
| Cytidine 3'-monophosphate                     | 69366  | 542284 | 240494 | 443731 | 403706 | 438333 | 128543 | 125748 | 131257 | 219555 | 191331 | 224669 |
| Decanoylcarnitine                             | 0.0008 | 0.0007 | 0.001  | 0.0014 | 0.0014 | 0.0014 | 0.0005 | 0.0006 | 0.0005 | 0.0007 | 0.0006 | 0.0007 |
| D-Glucose 6-phosphate                         | 179669 | 0.0071 | 0.0063 | 0.0074 | 0.0062 | 0.0071 | 0.0062 | 0.0068 | 0.0061 | 0.0067 | 0.0053 | 0.0051 |
| Di(5-nonyl) phthalate                         | 2E+06  | 2E+06  | 93156  | 235978 | 1E+06  | 1E+06  | 2E+06  | 985004 | 939274 | 2E+06  | 964758 | 1E+06  |
| Dibutyl adipate                               | 398977 | 40493  | 254029 | 557844 | 278277 | 286868 | 491859 | 251091 | 253074 | 546325 | 258093 | 271768 |
| Di-n-octyl phthalate                          | 9E+06  | 8E+06  | 5E+06  | 1E+06  | 6E+06  | 6E+06  | 102368 | 5E+06  | 5E+06  | 1E+06  | 5E+06  | 543462 |
| Norvaline                                     | 0.0086 | 0.0085 | 0.009  | 0.0082 | 0.0084 | 0.0086 | 104966 | 109525 | 11839  | 103509 | 109833 | 114524 |
| Phenylalanine                                 | 1E+07  | 1E+07  | 1E+07  | 1E+07  | 1E+07  | 1E+07  | 1E+07  | 1E+07  | 1E+07  | 1E+07  | 1E+07  | 1E+07  |
| Mannitol                                      | 158861 | 0.0085 | 0.0065 | 110067 | 127269 | 140509 | 0.005  | 0.0043 | 0.0046 | 0.0088 | 0.0062 | 113309 |
| Ornithine                                     | 569643 | 506572 | 484816 | 713992 | 715488 | 742235 | 3E+06  | 318566 | 307904 | 909256 | 904047 | 86555  |
| D-Pipecolic acid                              | 662888 | 643453 | 661003 | 665523 | 665173 | 655857 | 120178 | 1E+06  | 1E+06  | 1E+06  | 1E+06  | 1E+06  |
| Ergothioneine                                 | 918491 | 679556 | 719043 | 802981 | 757997 | 943438 | 1E+06  | 2E+06  | 2E+06  | 732591 | 823195 | 1E+06  |
| Ethanolamine                                  | 0.0035 | 0.0058 | 0.0034 | 0.0066 | 0.0055 | 0.0052 | 0.0016 | 0.0019 | 0.0021 | 0.002  | 0.0022 | 0.0021 |
| Ethylmalonic acid                             | 0.004  | 0.0035 | 0.0034 | 0.0028 | 0.0029 | 0.003  | 0.0071 | 0.004  | 0.0033 | 0.0039 | 0.0039 | 0.0034 |
| Gln-Ala                                       | 315851 | 286731 | 260582 | 216395 | 213649 | 215718 | 189164 | 15016  | 106822 | 163891 | 139565 | 100602 |
| Gln-Asn                                       | 178745 | 149642 | 150591 | 152351 | 144104 | 155731 | 131319 | 122874 | 109845 | 104841 | 0.0092 | 0.0094 |
| Gln-Asp                                       | 0.0071 | 148704 | 178714 | 0.0076 | 101844 | 109302 | 0.0083 | 169713 | 194442 | 0.009  | 143581 | 169326 |

|                             |        |        |        |        |        |        |        |        |        |        |        |        |
|-----------------------------|--------|--------|--------|--------|--------|--------|--------|--------|--------|--------|--------|--------|
| Gln-Gln                     | 395987 | 660842 | 68784  | 431726 | 477559 | 432828 | 310283 | 331839 | 27755  | 347955 | 327975 | 301519 |
| Gln-Gly                     | 16726  | 223923 | 223177 | 214761 | 219445 | 226792 | 100473 | 112752 | 108148 | 11104  | 104864 | 106131 |
| Gln-Ile                     | 251296 | 239991 | 288831 | 167521 | 213114 | 195559 | 170906 | 146311 | 118308 | 281724 | 240713 | 200328 |
| Gln-Leu                     | 85482  | 773111 | 861754 | 451264 | 553058 | 503443 | 0.0094 | 0.0072 | 0.0059 | 178591 | 0.0099 | 0.0073 |
| Gln-Met                     | 193311 | 157442 | 151113 | 0.0083 | 0.0081 | 0.0063 | 0.0038 | 0.0026 | 0.0015 | 0.0063 | 0.0035 | 0.0023 |
| Gln-Pro                     | 681132 | 565429 | 561687 | 496195 | 484169 | 400289 | 242259 | 0.0007 | 0.0004 | 0.0003 | 0.0008 | 0.0063 |
| Gln-Ser                     | 766138 | 671229 | 65266  | 398835 | 429975 | 437546 | 434339 | 388431 | 383161 | 246785 | 258003 | 259449 |
| Gln-Thr                     | 204625 | 121126 | 143784 | 0.0091 | 0.0087 | 130427 | 100509 | 0.0094 | 192211 | 0.0087 | 105137 | 206175 |
| Gln-Tyr                     | 190467 | 163227 | 16168  | 146326 | 138786 | 122086 | 0.003  | 0.0017 | 0.0019 | 0.005  | 0.003  | 0.0023 |
| Gln-Val                     | 354717 | 291936 | 293664 | 272664 | 261773 | 223618 | 326841 | 329991 | 273747 | 346537 | 323991 | 277455 |
| Glu-Gln                     | 153894 | 0.0091 | 0.0099 | 0.0068 | 0.0074 | 0.0095 | 0.0096 | 0.007  | 0.0098 | 0.0062 | 0.0063 | 0.0095 |
| Glu-Gly                     | 583103 | 527987 | 511422 | 438912 | 413644 | 401001 | 591795 | 577028 | 512029 | 470679 | 443891 | 416777 |
| Glu-His                     | 192457 | 224225 | 203299 | 180509 | 181807 | 192206 | 354017 | 315299 | 302363 | 276514 | 301275 | 314032 |
| Glu-Ile                     | 428102 | 435387 | 473264 | 259054 | 343969 | 323728 | 667047 | 613348 | 624996 | 63187  | 652818 | 704912 |
| Glu-Pro                     | 110942 | 125194 | 111067 | 0.0093 | 0.0096 | 0.0096 | 0.0092 | 0.0082 | 0.0081 | 0.0064 | 0.0065 | 0.0056 |
| Glu-Thr                     | 216575 | 177493 | 136912 | 115966 | 103273 | 0.0091 | 226264 | 171525 | 136118 | 149858 | 129637 | 0.01   |
| Glu-Trp                     | 19201  | 224823 | 304717 | 114996 | 143509 | 146575 | 402819 | 425418 | 469853 | 316696 | 375885 | 433352 |
| Glu-Tyr                     | 128257 | 128502 | 148042 | 0.0095 | 115453 | 118088 | 175213 | 16798  | 148574 | 164195 | 147943 | 152257 |
| Glu-Val                     | 386974 | 330773 | 346968 | 238317 | 249041 | 224774 | 41743  | 36541  | 33285  | 409805 | 388175 | 360826 |
| Gly-Arg                     | 639548 | 646709 | 686023 | 454791 | 478751 | 470636 | 544518 | 485573 | 481636 | 456921 | 497653 | 457575 |
| Glycerophosphocholine       | 3E+06  | 1E+06  | 976554 | 748372 | 587345 | 77536  | 108698 | 109281 | 0.0061 | 398955 | 21711  | 133164 |
| Gly-Val                     | 383026 | 34204  | 322764 | 242613 | 252062 | 230406 | 667968 | 55173  | 554114 | 567615 | 578345 | 584661 |
| Granisetron                 | 0.0032 | 0.0034 | 0.0037 | 0.0001 | 0.0001 | 0.0002 | 0.0005 | 0.0004 | 0.0005 | 0.0002 | 0.0001 | 0.0001 |
| Guanidine                   | 0.0037 | 0.0041 | 0.0035 | 0.0034 | 0.0036 | 0.003  | 0.005  | 0.0052 | 0.0048 | 0.0056 | 0.0054 | 0.0058 |
| Guanine                     | 2E+06  | 2E+06  | 2E+06  | 2E+06  | 2E+06  | 2E+06  | 2E+06  | 2E+06  | 2E+06  | 22904  | 2E+06  | 2E+06  |
| Guanosine                   | 302647 | 3E+06  | 3E+06  | 3E+06  | 2E+06  | 2E+06  | 4E+06  | 4E+06  | 4E+06  | 4E+06  | 4E+06  | 4E+06  |
| Guanosine 5'-monophosphate  | 467264 | 42994  | 339673 | 458157 | 394254 | 429205 | 128187 | 106829 | 0.0079 | 389634 | 315644 | 276806 |
| Guanosine 5'-tetraphosphate | 0.0054 | 0.0028 | 0.0027 | 0.0019 | 0.0018 | 0.0015 | 113337 | 0.007  | 0.0053 | 109116 | 0.0085 | 0.0048 |
| Hexanoylcarnitine           | 0.0054 | 0.0089 | 0.006  | 0.0037 | 0.0041 | 0.0043 | 0.0095 | 0.0095 | 122261 | 0.0082 | 0.0095 | 0.0097 |
| His-Ala                     | 271484 | 243961 | 200723 | 558942 | 498339 | 419557 | 371532 | 388797 | 349278 | 48909  | 490785 | 461261 |
| His-Asn                     | 218098 | 19538  | 179047 | 211921 | 0.0082 | 180707 | 223585 | 218914 | 20221  | 215246 | 216629 | 193222 |
| His-Asp                     | 128768 | 126865 | 125921 | 149147 | 158309 | 175421 | 148015 | 147336 | 136972 | 13605  | 131261 | 132554 |
| His-Glu                     | 305955 | 295965 | 2502   | 321657 | 27004  | 241466 | 159596 | 115121 | 0.0083 | 207631 | 163867 | 13313  |

|                                 |        |        |        |        |        |        |        |        |        |        |        |        |
|---------------------------------|--------|--------|--------|--------|--------|--------|--------|--------|--------|--------|--------|--------|
| His-Gly                         | 156223 | 29701  | 306943 | 316569 | 302112 | 330504 | 248954 | 209503 | 173977 | 324637 | 316259 | 270639 |
| His-His                         | 0.0052 | 0.0044 | 0.0035 | 0.007  | 0.0067 | 0.0059 | 133005 | 114142 | 107653 | 162265 | 173286 | 156426 |
| His-Ile                         | 0.0015 | 0.0017 | 0.0006 | 0.0045 | 0.0027 | 0.0028 | 531295 | 493863 | 439171 | 679918 | 700643 | 615804 |
| His-Lys                         | 0.0043 | 0.0033 | 0.0024 | 0.0063 | 0.0046 | 0.0032 | 197795 | 170813 | 142179 | 188124 | 201268 | 14957  |
| His-Pro                         | 734314 | 736198 | 767975 | 673139 | 776384 | 653452 | 101613 | 0.0082 | 0.0067 | 0.0088 | 0.0091 | 0.005  |
| His-Trp                         | 0.0004 | 0.0003 | 0      | 0      | 0      | 0      | 0.009  | 0.0072 | 0.0057 | 106592 | 0.0086 | 0.0069 |
| His-Val                         | 0.0015 | 0.0017 | 0.0012 | 0.0067 | 0.0041 | 155421 | 742848 | 694074 | 62057  | 902315 | 939502 | 797439 |
| Ile-Ala                         | 153992 | 2E+06  | 2E+06  | 1E+06  | 1E+06  | 1E+06  | 2E+06  | 2E+06  | 2E+06  | 2E+06  | 2E+06  | 1E+06  |
| Ile-Gln                         | 520663 | 40747  | 347159 | 41154  | 372422 | 290446 | 197219 | 181931 | 137222 | 322827 | 236609 | 155423 |
| Ile-Glu                         | 1E+06  | 971129 | 1E+06  | 713478 | 794446 | 723115 | 1E+06  | 1E+06  | 919986 | 1E+06  | 1E+06  | 970735 |
| Ile-Gly                         | 863591 | 912404 | 98605  | 854838 | 900473 | 917236 | 1E+06  | 1E+06  | 1E+06  | 125681 | 1E+06  | 1E+06  |
| Ile-His                         | 265972 | 257586 | 226735 | 312912 | 313755 | 285189 | 550285 | 523347 | 482748 | 50526  | 557787 | 500714 |
| Ile-Leu                         | 3E+06  | 3E+06  | 2E+06  | 2E+06  | 2E+06  | 2E+06  | 2E+06  | 2E+06  | 2E+06  | 3E+06  | 3E+06  | 2E+06  |
| Ile-Lys                         | 1E+06  | 1E+06  | 1E+06  | 1E+06  | 1E+06  | 1E+06  | 2E+06  | 1E+06  | 1E+06  | 2E+06  | 2E+06  | 143271 |
| Ile-Pro                         | 4E+06  | 4E+06  | 5E+06  | 4E+06  | 4E+06  | 4E+06  | 4E+06  | 4E+06  | 4E+06  | 3E+06  | 4E+06  | 3E+06  |
| Ile-Ser                         | 48522  | 42181  | 415333 | 26309  | 249315 | 222313 | 770071 | 69253  | 705253 | 676988 | 680854 | 599213 |
| Ile-Thr                         | 639222 | 550736 | 547042 | 39189  | 424727 | 369083 | 438443 | 414592 | 360424 | 452157 | 438183 | 319582 |
| Ile-Val                         | 928594 | 884677 | 873596 | 731695 | 826871 | 735117 | 3E+06  | 4E+06  | 3E+06  | 3E+06  | 4E+06  | 3E+06  |
| Indapamide                      | 0.0071 | 0.0083 | 0.0084 | 0.0069 | 0.0078 | 0.0076 | 0.0089 | 0.0093 | 0.0094 | 0.0084 | 0.0094 | 0.0095 |
| Isovalerylcarnitine             | 2E+07  | 2E+07  | 2E+07  | 6E+06  | 6E+06  | 7E+06  | 2E+07  | 2E+07  | 2E+07  | 1E+07  | 2E+07  | 2E+07  |
| $\beta$ -Homolysine             | 0.0036 | 0.0006 | 0.001  | 0.0043 | 0.0011 | 0.0088 | 0.0037 | 0.0041 | 0.0052 | 364675 | 389203 | 435148 |
| $\gamma$ -Glutamylglutamic acid | 394942 | 391178 | 373017 | 3045   | 318118 | 338234 | 413624 | 354179 | 30747  | 310691 | 289659 | 285984 |
| Alanyl norleucine               | 1E+06  | 1E+06  | 1E+06  | 945313 | 1E+06  | 1E+06  | 738431 | 819641 | 749313 | 948361 | 1E+06  | 690505 |
| Arginine                        | 1E+07  | 1E+07  | 9E+06  | 9E+06  | 9E+06  | 9E+06  | 1E+07  | 1E+06  | 1E+07  | 1E+06  | 1E+07  | 1E+07  |
| Arginine, methyl ester          | 0.0035 | 0.0042 | 0.0037 | 0.0028 | 0.0029 | 0.003  | 0.0084 | 0.0089 | 0.0077 | 0.0069 | 0.0042 | 0.0047 |
| Aspartic acid                   | 180348 | 134722 | 138245 | 0.0076 | 0.007  | 0.0081 | 0.0039 | 0.0038 | 0.0039 | 0.0014 | 0.0016 | 0.0018 |
| Carnitine                       | 3E+06  | 3E+06  | 4E+06  | 2E+06  | 27997  | 4E+06  | 1E+06  | 1E+06  | 2E+06  | 1E+06  | 1E+06  | 2E+06  |
| Cystathionine                   | 769052 | 758579 | 689456 | 449824 | 355434 | 42931  | 460598 | 484563 | 414429 | 754862 | 420224 | 817645 |
| Leu-Arg                         | 526349 | 349508 | 261289 | 644513 | 575231 | 459636 | 369247 | 339129 | 244292 | 595909 | 575884 | 276295 |
| Leu-Gly                         | 289187 | 307752 | 383527 | 394264 | 453146 | 47215  | 318254 | 334445 | 406728 | 336331 | 434825 | 437751 |
| Leu-His                         | 0.0019 | 0.0018 | 0.0011 | 0.0047 | 0.0032 | 0.0021 | 153095 | 109767 | 0.0078 | 279537 | 191466 | 131405 |
| Leu-Leu                         | 0.0087 | 0.0053 | 0.0043 | 0.0001 | 0.0036 | 0.002  | 0.0066 | 0.0077 | 0.0054 | 0.0089 | 109724 | 0.0063 |
| Leu-Pro                         | 5E+06  | 503317 | 5E+06  | 5E+06  | 5E+06  | 526797 | 2E+06  | 227496 | 2E+06  | 2E+06  | 2E+06  | 2E+06  |

|                                      |        |        |        |        |        |        |        |        |        |        |        |        |
|--------------------------------------|--------|--------|--------|--------|--------|--------|--------|--------|--------|--------|--------|--------|
| Leu-Ser                              | 0.0035 | 0.0027 | 0.0027 | 0.0018 | 0.0019 | 0.0015 | 0.0034 | 0.0029 | 0.0024 | 0.0026 | 0.0024 | 0.0019 |
| Leu-Val                              | 3E+06  | 3E+06  | 3E+06  | 2E+06  | 2E+06  | 2E+06  | 2E+06  | 2E+06  | 1E+06  | 309328 | 3E+06  | 2E+06  |
| Glutamic acid                        | 2E+06  | 194396 | 2E+06  | 185819 | 2E+06  | 2E+06  | 1E+06  | 14825  | 1E+06  | 1E+06  | 1E+06  | 1E+06  |
| Glutamine                            | 4E+06  | 3E+06  | 3E+06  | 3E+06  | 3E+06  | 3E+06  | 3E+06  | 3E+06  | 3E+06  | 4E+06  | 4E+06  | 4E+06  |
| Histidine                            | 6E+06  | 606445 | 6E+06  | 6E+06  | 6E+06  | 6E+06  | 8E+06  | 8E+06  | 8E+06  | 7E+06  | 675208 | 7E+06  |
| Homoserine                           | 115765 | 103389 | 0.0089 | 0.008  | 0.0083 | 0.0078 | 138193 | 22082  | 215478 | 149775 | 153448 | 100134 |
| Hydroxyarginine                      | 0.0066 | 0.006  | 136337 | 0.0059 | 0.0056 | 0.0059 | 0.0028 | 0.0025 | 0.0018 | 0.0025 | 0.0028 | 0.0028 |
| Lisdexamfetamine                     | 0.0042 | 0.0041 | 0.0043 | 0.0045 | 0.0041 | 0.0041 | 0.0072 | 0.0073 | 0.0071 | 0.0075 | 0.0073 | 0.0071 |
| Isoleucine                           | 6E+06  | 6E+06  | 7E+06  | 7E+06  | 6E+06  | 7E+06  | 7E+06  | 8E+06  | 8E+06  | 7E+06  | 7E+06  | 8E+06  |
| Leucine                              | 8E+06  | 9E+06  | 9E+06  | 9E+06  | 1E+07  | 9E+06  | 9E+06  | 1E+07  | 1E+07  | 9E+06  | 1E+07  | 1E+07  |
| Lysine                               | 4E+06  | 3E+06  | 4E+06  | 4E+06  | 4E+06  | 4E+06  | 5E+06  | 5E+06  | 460057 | 5E+06  | 5E+06  | 5E+06  |
| Methionine                           | 2E+06  | 6E+06  | 3E+06  | 2E+06  | 2E+06  | 2E+06  | 3E+06  | 4E+06  | 3E+06  | 3E+06  | 3E+06  | 3E+06  |
| Phenylalanine, methyl ester          | 0.0088 | 0.0094 | 0.01   | 0.008  | 0.0095 | 0.0093 | 0.0067 | 0.0081 | 0.0065 | 0.006  | 0.007  | 0.0043 |
| Pipecolic acid                       | 438357 | 438323 | 420272 | 460104 | 420604 | 42116  | 251036 | 25426  | 245154 | 370436 | 439807 | 354509 |
| Proline                              | 3E+06  | 3E+06  | 3E+06  | 2E+06  | 2E+06  | 2E+06  | 8E+06  | 8E+06  | 7E+06  | 517002 | 5E+06  | 6E+06  |
| Propionylcarnitine                   | 4E+06  | 4E+06  | 4E+06  | 4E+06  | 4E+06  | 4E+06  | 3E+06  | 3E+06  | 3E+06  | 1E+06  | 1E+06  | 1E+06  |
| Threonine                            | 0.0014 | 0.0012 | 0.0011 | 0.0005 | 0.0001 | 0.0005 | 101335 | 117096 | 113621 | 0.0085 | 0.0077 | 0.0076 |
| Tryptophan                           | 5E+06  | 528774 | 5E+06  | 5E+06  | 5E+06  | 5E+06  | 57851  | 6E+06  | 6E+06  | 554449 | 6E+06  | 6E+06  |
| Tyrosine                             | 4E+06  | 51252  | 5E+06  | 5E+06  | 4E+06  | 5E+06  | 5E+06  | 6E+06  | 568914 | 5E+06  | 5E+06  | 6E+06  |
| Valine                               | 31933  | 3E+06  | 334537 | 308435 | 3E+06  | 3E+06  | 374631 | 4E+06  | 4E+06  | 4E+06  | 4E+06  | 4E+06  |
| Lys-Asp                              | 397683 | 425522 | 415259 | 324299 | 326231 | 325408 | 533367 | 535918 | 584462 | 534531 | 552469 | 582319 |
| Lys-Pro                              | 1E+06  | 114957 | 1E+06  | 107484 | 1E+06  | 1E+06  | 21327  | 130802 | 0.0098 | 212162 | 172277 | 126047 |
| Lys-Ser                              | 384814 | 346977 | 320721 | 236925 | 192166 | 184292 | 540345 | 464304 | 44478  | 557808 | 720188 | 477724 |
| Maltotetraose                        | 0.0013 | 0.0007 | 0.0004 | 0.0013 | 0.0013 | 0.0012 | 0.0006 | 0.0007 | 0.0004 | 0.0007 | 0.0006 | 0.0007 |
| Melibiose                            | 468569 | 293082 | 246489 | 271364 | 201538 | 272592 | 225992 | 338471 | 263481 | 225052 | 207293 | 221901 |
| Met-Glu                              | 0.0092 | 0.0083 | 0.0072 | 0.0041 | 0.0047 | 0.0038 | 0.0018 | 0.0011 | 0.0011 | 0.0033 | 0.0011 | 0.0001 |
| Met-Gly                              | 0.0045 | 0.0036 | 0.0035 | 0.0022 | 0.0022 | 0.0025 | 0.0019 | 0.0013 | 0.0011 | 0.003  | 0.0018 | 0.0015 |
| Met-Pro                              | 416868 | 371    | 418673 | 394672 | 434249 | 413411 | 195611 | 196428 | 194756 | 230789 | 269298 | 292612 |
| N-(3-(Aminomethyl)benzyl)acetamide   | 0.0022 | 0.0023 | 0.0025 | 0.0009 | 0.001  | 0.001  | 0.001  | 0.0011 | 0.001  | 0.0007 | 0.0011 | 0.0011 |
| N-(3-Aminopropyl)acetamide           | 0.0075 | 0.007  | 0.0083 | 0.0049 | 0.0042 | 0.0047 | 0.0066 | 0.007  | 0.0069 | 120838 | 101753 | 131765 |
| N-(4-Acetylphenyl)-4-methylbenzamide | 0.009  | 0.0052 | 0.0054 | 0.0054 | 0.0056 | 0.0057 | 0.0047 | 0.0045 | 0.0046 | 0.0042 | 0.0042 | 0.0046 |
| N-(Aminocarbonyl)phenylalanine       | 0.0014 | 0.0017 | 0.0017 | 0.0041 | 0.0046 | 0.0047 | 0.0032 | 0.0033 | 0.0033 | 0.0025 | 0.0027 | 0.003  |
| N,N'-Diacetylchitobiose              | 0.0015 | 0.0004 | 0.0004 | 0.0003 | 0.0004 | 0.0003 | 0      | 0      | 0      | 0      | 0      | 0      |

|                                             |        |        |        |        |        |        |        |        |        |        |        |        |
|---------------------------------------------|--------|--------|--------|--------|--------|--------|--------|--------|--------|--------|--------|--------|
| N,N-Dimethylhistidine                       | 0.0015 | 0.0011 | 0.0012 | 0.0021 | 0.0013 | 0.0019 | 0.0035 | 0.0033 | 0.0028 | 0.0017 | 0.0014 | 0.0011 |
| N- $\alpha$ -(tert-Butoxycarbonyl)histidine | 460049 | 456808 | 308037 | 421319 | 43752  | 465872 | 618931 | 616458 | 597027 | 484096 | 497878 | 507421 |
| N- $\alpha$ -Acetylornithine                | 286184 | 218541 | 204033 | 185858 | 172559 | 170719 | 62317  | 556008 | 50158  | 430457 | 395701 | 354574 |
| N-[2-(1H-Indol-3-yl)ethyl]nicotinamide      | 1E+06  | 2E+06  | 2E+06  | 665539 | 921403 | 1E+06  | 3E+06  | 4E+06  | 4E+06  | 5E+06  | 7E+06  | 8E+06  |
| N1,N12-Diethylspermine                      | 0.0009 | 0.0009 | 0.0008 | 0.0015 | 0.0014 | 0.0015 | 125248 | 126944 | 132328 | 119452 | 130937 | 124249 |
| N5-(1-Iminoethyl)ornithine                  | 2702   | 273933 | 2933   | 241766 | 273577 | 263414 | 191067 | 19633  | 184049 | 195599 | 198316 | 177758 |
| N-Acetylglucosamine                         | 116708 | 0.0063 | 0.0054 | 0.004  | 0.0034 | 0.004  | 0.0036 | 0.0063 | 0.0052 | 0.0055 | 0.0061 | 0.0062 |
| 1-Acetylproline                             | 0.0009 | 0.0007 | 0.0006 | 0.0006 | 0.0008 | 0.0009 | 0.002  | 0.0025 | 0.0029 | 0.0044 | 0.0059 | 0.0068 |
| N-Acetylphenylalanine                       | 0.0012 | 0.0011 | 0.0011 | 0.0005 | 0.0007 | 0.0006 | 0.0025 | 0.0028 | 0.003  | 0.0019 | 0.0029 | 0.0029 |
| N-Acetylproline                             | 0.0018 | 0.0013 | 0.0011 | 0.001  | 0.001  | 0.001  | 0.0036 | 0.0034 | 0.0028 | 0.0026 | 0.0021 | 0.002  |
| N-Acetyltyrosine                            | 59344  | 656396 | 665971 | 605966 | 596093 | 638821 | 716527 | 76733  | 752499 | 666684 | 722306 | 760691 |
| N-Cyclopentylglycine                        | 0      | 0      | 0      | 0      | 0      | 0      | 0      | 0      | 0      | 158963 | 114516 | 10973  |
| N-Formyltryptophan                          | 3E+06  | 3E+06  | 4E+06  | 3E+06  | 3E+06  | 3E+06  | 4E+06  | 4E+06  | 4E+06  | 4E+06  | 373302 | 4E+06  |
| NG,NG-Dimethylarginine                      | 738279 | 643327 | 674284 | 5175   | 579017 | 582396 | 1E+06  | 1E+06  | 1E+06  | 986001 | 1E+06  | 995501 |
| Nicotinic acid                              | 2E+06  | 2E+06  | 3E+06  | 2E+06  | 2E+06  | 2E+06  | 1E+06  | 1E+06  | 891955 | 1E+06  | 969892 | 870127 |
| Octanoylcarnitine                           | 0.0056 | 0.0074 | 0.0078 | 0.0089 | 0.0085 | 0.0095 | 0.0067 | 0.007  | 0.0073 | 0.0032 | 0.0037 | 0.0035 |
| O-tert-Butylthreonine                       | 2E+06  | 1E+06  | 1E+06  | 1E+06  | 112495 | 1E+06  | 1E+06  | 1E+06  | 1E+06  | 951126 | 993011 | 1E+06  |
| Pantothenic acid                            | 652845 | 545193 | 512694 | 577072 | 610449 | 629698 | 6429   | 662902 | 67619  | 287369 | 0.01   | 187707 |
| p-Coumaric acid                             | 0.0072 | 0.0089 | 0.0088 | 0.0082 | 0.0078 | 0.0082 | 0.0094 | 0.0094 | 100427 | 0.0081 | 0.0095 | 0.0099 |
| Phe-Gly                                     | 223116 | 22666  | 279775 | 257034 | 29659  | 290935 | 20657  | 235497 | 289744 | 205052 | 274979 | 272824 |
| Phe-Pro                                     | 824426 | 1E+06  | 1E+06  | 916171 | 1E+06  | 1E+06  | 560212 | 557976 | 555693 | 46197  | 557296 | 421516 |
| Phosphocholine                              | 737865 | 312945 | 274334 | 332578 | 27407  | 318794 | 547853 | 610662 | 536994 | 435219 | 463029 | 391621 |
| Phthalic acid                               | 223567 | 211997 | 120631 | 313627 | 136506 | 13869  | 2661   | 129389 | 12218  | 314564 | 127375 | 128538 |
| Pro-Ala                                     | 199952 | 162866 | 190542 | 33404  | 389076 | 422344 | 390875 | 421665 | 499244 | 298401 | 298502 | 460346 |
| Pro-Ala-Arg                                 | 0.0006 | 0.0007 | 0.0008 | 0.0007 | 0.0009 | 0.0009 | 0.0029 | 0.003  | 0.001  | 0.002  | 0.002  | 0.0008 |
| Pro-Asn                                     | 0.0095 | 0.0061 | 0.0056 | 0.0074 | 0.0062 | 0.0057 | 0.0091 | 0.0061 | 0.0051 | 0.0079 | 0.0057 | 0.0055 |
| Pro-Asp                                     | 142673 | 121224 | 126311 | 110967 | 115753 | 124966 | 152824 | 134773 | 142377 | 129436 | 138751 | 152455 |
| Pro-Gln                                     | 200844 | 171013 | 176238 | 179555 | 184051 | 196775 | 265717 | 230548 | 243429 | 278304 | 271866 | 234912 |
| Pro-Glu                                     | 272415 | 22145  | 22099  | 264118 | 276482 | 27079  | 354696 | 300598 | 308218 | 242289 | 212512 | 298714 |
| Pro-Gly                                     | 192238 | 189399 | 187045 | 162716 | 158266 | 188221 | 272496 | 231398 | 212028 | 215521 | 21673  | 210994 |
| Prolylalanine                               | 0.0025 | 0.003  | 0.0023 | 0.0068 | 0.0074 | 0.0072 | 0.0077 | 0.0023 | 0.0024 | 0.0027 | 0.0031 | 0.0033 |
| Pro-Phe                                     | 204867 | 242153 | 284783 | 440734 | 489888 | 552511 | 764537 | 87117  | 908751 | 894572 | 875635 | 925374 |
| Pro-Pro                                     | 2E+06  | 2E+06  | 213569 | 2E+06  | 2E+06  | 3E+06  | 309478 | 3E+06  | 3E+06  | 3E+06  | 3E+06  | 3E+06  |

|                           |        |        |        |        |        |        |        |        |        |        |        |        |
|---------------------------|--------|--------|--------|--------|--------|--------|--------|--------|--------|--------|--------|--------|
| Pro-Thr                   | 22045  | 198299 | 17902  | 249578 | 218717 | 219206 | 420416 | 356077 | 327825 | 321063 | 293544 | 290902 |
| Pro-Tyr                   | 0.0034 | 0.003  | 0.0034 | 0.0095 | 0.0096 | 103367 | 142115 | 135464 | 143735 | 186778 | 167692 | 199354 |
| Pro-Val                   | 216706 | 241708 | 26246  | 314159 | 321172 | 407215 | 1E+06  | 2E+06  | 2E+06  | 1E+06  | 1E+06  | 2E+06  |
| Pyrrolidine               | 0.002  | 0.0022 | 0.0027 | 0.0053 | 0.0058 | 0.0056 | 195021 | 190296 | 211994 | 180094 | 192912 | 18469  |
| Acetamidomethylcysteine   | 0.0014 | 0.0009 | 0.0009 | 0.0009 | 0.0008 | 0.0007 | 0.0045 | 0.006  | 0.0073 | 0.0043 | 0.0059 | 0.0097 |
| Sarcosine                 | 114323 | 146863 | 0.0095 | 0.0099 | 0.0095 | 10259  | 0.0071 | 0.0065 | 0.0065 | 0.0068 | 0.0068 | 0.0062 |
| Ser-Glu                   | 337435 | 263965 | 233733 | 168218 | 158333 | 14683  | 252796 | 178293 | 140891 | 190026 | 143836 | 134413 |
| Ser-Ile                   | 207595 | 200661 | 218973 | 13911  | 16863  | 150527 | 211804 | 182477 | 175143 | 263406 | 264209 | 24422  |
| Ser-Leu                   | 459529 | 473836 | 572328 | 254625 | 344333 | 326204 | 38489  | 375908 | 386721 | 417552 | 471574 | 404945 |
| Ser-Lys                   | 242645 | 250206 | 208981 | 172508 | 152061 | 151967 | 169376 | 147303 | 159593 | 113208 | 153799 | 155603 |
| Ser-Pro                   | 799044 | 710294 | 63038  | 564749 | 506041 | 536689 | 131801 | 0.005  | 0.0055 | 0.0092 | 0.0065 | 0.0044 |
| Ser-Thr                   | 401174 | 409832 | 367782 | 274406 | 258298 | 267081 | 353121 | 353661 | 331871 | 299454 | 298294 | 285544 |
| Spermidine                | 438983 | 397751 | 430618 | 826267 | 830403 | 810078 | 7E+06  | 6E+06  | 7E+06  | 6E+06  | 670365 | 6E+06  |
| Tetrabutylammonium cation | 1E+06  | 9E+06  | 9E+06  | 8E+06  | 792066 | 8E+06  | 8E+06  | 8E+06  | 7E+06  | 8E+06  | 7E+06  | 7E+06  |
| Thiamine cation           | 0.0029 | 0.0025 | 0.0024 | 0.0024 | 0.0023 | 0.002  | 0.0083 | 0.0069 | 0.0059 | 0.0063 | 0.0065 | 0.0062 |
| Thr-Ala                   | 518572 | 407481 | 373825 | 279068 | 275258 | 265234 | 410996 | 342291 | 279569 | 256716 | 229686 | 215214 |
| Thr-Arg                   | 758832 | 72378  | 770463 | 31748  | 296728 | 275123 | 646596 | 686406 | 66043  | 475029 | 494712 | 48325  |
| Thr-Glu                   | 459799 | 439172 | 396435 | 261859 | 26607  | 297694 | 281056 | 222108 | 173227 | 204057 | 167699 | 172742 |
| Thr-Gly                   | 109287 | 162643 | 233179 | 121163 | 151711 | 177382 | 120409 | 202467 | 241752 | 110679 | 16954  | 197707 |
| Thr-Leu                   | 649341 | 539646 | 515463 | 423242 | 4948   | 444471 | 638349 | 559969 | 499607 | 843991 | 709822 | 625731 |
| Thr-Lys                   | 400137 | 383125 | 368561 | 262921 | 259896 | 270989 | 554776 | 556984 | 521696 | 50615  | 561699 | 478146 |
| Thr-Pro                   | 2E+06  | 2E+06  | 2E+06  | 1E+06  | 1E+06  | 1E+06  | 415993 | 33354  | 304625 | 280617 | 271203 | 166423 |
| Thr-Ser                   | 175671 | 159436 | 151103 | 106004 | 11271  | 113961 | 116204 | 110701 | 0.0094 | 0.007  | 0.0069 | 0.007  |
| Thr-Thr                   | 357789 | 23455  | 200857 | 152509 | 140409 | 117036 | 315254 | 226144 | 183088 | 21871  | 168836 | 141873 |
| Thr-Trp                   | 0.0097 | 0.0085 | 0.0082 | 0.0074 | 0.0087 | 0.0081 | 311086 | 27845  | 247758 | 366419 | 329823 | 284559 |
| trans-Aconitic acid       | 0.001  | 0.0007 | 0.0005 | 0.0007 | 0.0005 | 0.0006 | 0.0007 | 0.0007 | 0.0005 | 0.0023 | 0.0027 | 0.0019 |
| trans-Cinnamic acid       | 151382 | 164685 | 167889 | 150601 | 15701  | 156768 | 190693 | 198001 | 19427  | 18951  | 194821 | 195212 |
| Tropic acid               | 12822  | 138933 | 141466 | 125321 | 128765 | 134866 | 155773 | 167053 | 160034 | 154668 | 163354 | 165583 |
| Tryptamine                | 394392 | 62676  | 884996 | 58653  | 790492 | 849763 | 1E+06  | 2E+06  | 2E+06  | 3E+06  | 4E+06  | 5E+06  |
| Tyr-Glu                   | 213179 | 213408 | 167255 | 219865 | 182119 | 17712  | 0.0014 | 0.0015 | 0.001  | 0.0022 | 0.0015 | 0.001  |
| Tyr-Pro                   | 384145 | 413475 | 458586 | 382066 | 481988 | 411219 | 160403 | 159043 | 150822 | 152629 | 164621 | 110121 |
| Urea                      | 0      | 0      | 0      | 0      | 0      | 0      | 0.0022 | 0.0022 | 0.0024 | 0.0018 | 0.0018 | 0.0024 |
| Val-Ala                   | 1E+06  | 846361 | 911813 | 399776 | 434308 | 422424 | 1E+06  | 1E+06  | 1E+06  | 1E+06  | 1E+06  | 907749 |

|              |        |        |        |        |        |        |        |        |        |        |        |        |
|--------------|--------|--------|--------|--------|--------|--------|--------|--------|--------|--------|--------|--------|
| Val-Arg      | 677944 | 499181 | 382804 | 665633 | 576238 | 465956 | 1E+06  | 1E+06  | 783222 | 1E+06  | 1E+06  | 765002 |
| Val-Asn      | 53805  | 424425 | 399752 | 271512 | 252579 | 248957 | 658085 | 551195 | 489945 | 579403 | 569007 | 432488 |
| Val-Asp      | 178707 | 140302 | 148273 | 113986 | 118816 | 118033 | 249225 | 222823 | 181728 | 170172 | 164536 | 146246 |
| Val-Gln      | 98739  | 75281  | 755651 | 539915 | 558034 | 476935 | 970289 | 796601 | 658803 | 684487 | 635016 | 484499 |
| Val-Glu      | 528638 | 461004 | 457731 | 2867   | 29371  | 280979 | 527745 | 447495 | 395025 | 498387 | 45584  | 408566 |
| Val-His      | 32337  | 272398 | 25786  | 280721 | 289496 | 254286 | 636277 | 539305 | 439723 | 603856 | 610824 | 50855  |
| Val-Ile      | 108698 | 108233 | 1E+06  | 723156 | 842537 | 741652 | 2E+06  | 2E+06  | 2E+06  | 2E+06  | 2E+06  | 2E+06  |
| Val-Lys      | 1E+06  | 1E+06  | 1E+06  | 1E+06  | 1E+06  | 1E+06  | 2E+06  | 2E+06  | 2E+06  | 2E+06  | 228259 | 2E+06  |
| Val-Met      | 138544 | 100111 | 0.0088 | 0.0086 | 0.0099 | 0.0081 | 207136 | 189003 | 206676 | 331177 | 330476 | 282829 |
| Val-Phe      | 529203 | 399431 | 31504  | 449553 | 475433 | 356427 | 544919 | 486004 | 34586  | 917194 | 64858  | 429862 |
| Val-Pro      | 3E+06  | 3E+06  | 3E+06  | 2E+06  | 3E+06  | 3E+06  | 758415 | 698766 | 63598  | 61399  | 690323 | 391455 |
| Val-Ser      | 0.0062 | 0.0044 | 0.0075 | 0.002  | 0.0041 | 0.0046 | 0.0075 | 0.0096 | 166693 | 0.0038 | 0.0055 | 0.0086 |
| Val-Thr      | 749752 | 562372 | 548205 | 372922 | 388147 | 314427 | 714472 | 574184 | 4724   | 557115 | 476139 | 3662   |
| Val-Trp      | 101281 | 0.0067 | 0.0032 | 0.0061 | 0.0067 | 0.0052 | 12112  | 137365 | 102849 | 268343 | 264691 | 154206 |
| Val-Val      | 714652 | 740127 | 826526 | 531339 | 720439 | 663026 | 2E+06  | 2E+06  | 2E+06  | 2E+06  | 257803 | 2E+06  |
| Vildagliptin | 111629 | 11891  | 123324 | 120044 | 35332  | 123046 | 118859 | 121095 | 116821 | 108981 | 10639  | 112303 |



**Figure 1S.** Fragmentation patterns for the identification of three selected amino acids and dipeptides (blue colour) confirmed by comparison with theoretical spectra (red colour).

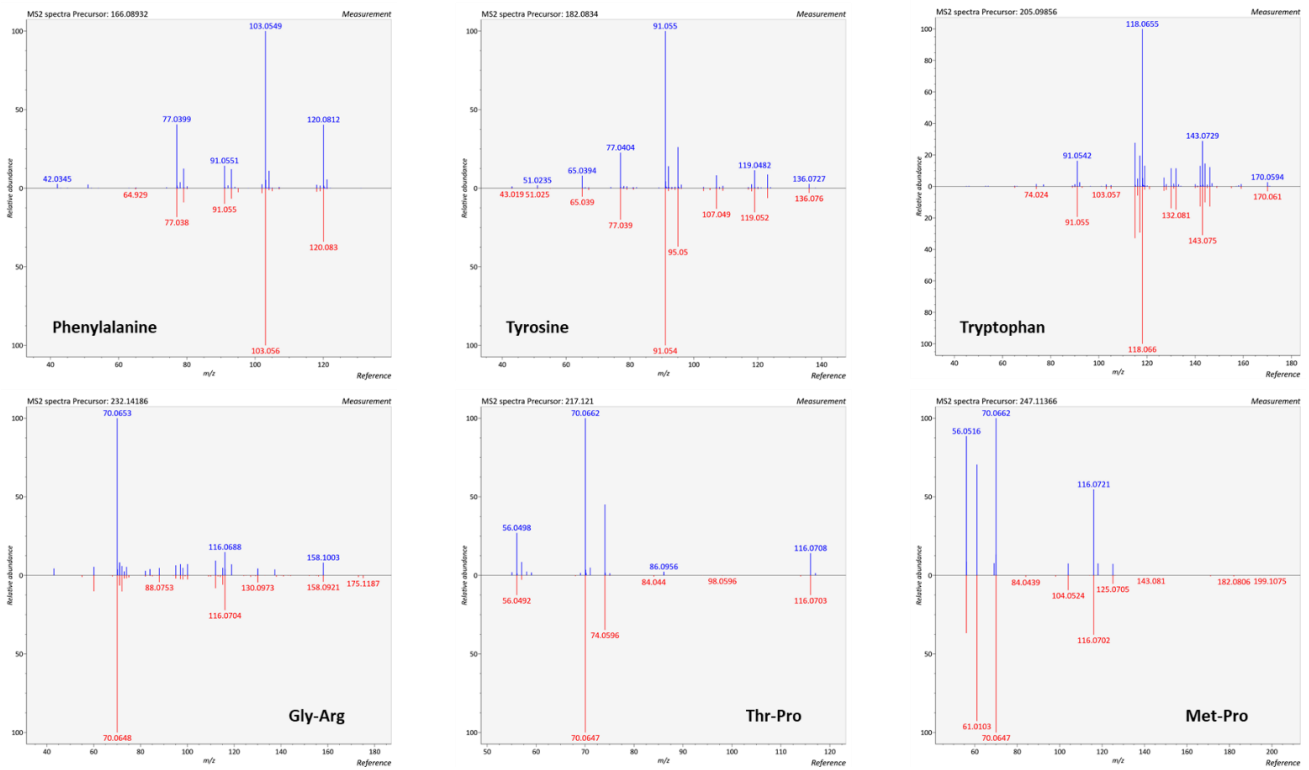

**Table 3S.** Enrichment pathways of 24 discriminant amino acids differentially expressed in *P. ostreatus* samples grown on WS and LcS substrates: Match Status is the number of metabolites that match in the indicated pathway; p is the original p-value calculated from the Enrichment Analysis; Holm p value is the p value adjusted by Holm-Bonferroni test; impact is the pathway impact value calculated from pathway topology analysis.

| Pathway Name                                        | Match Status | p        | -log(p) | Holm p    | Impact  | Involved metabolites                                    |
|-----------------------------------------------------|--------------|----------|---------|-----------|---------|---------------------------------------------------------|
| Glycine, serine and threonine metabolism            | 2/33         | 6.72E-09 | 8.1727  | 1.28E-07  | 0.05034 | Betaine, Threonine                                      |
| Valine, leucine and isoleucine biosynthesis         | 1/8          | 1.18E-06 | 5.9282  | 2.12E-05  | 0       | Threonine                                               |
| D-Glutamine and D-glutamate metabolism              | 1/6          | 1.18E-05 | 4.9283  | 2.01E-04  | 0.5     | Glutamate                                               |
| Glutathione metabolism                              | 1/28         | 1.18E-05 | 4.9283  | 2.01E-04  | 0.01966 | Glutamate                                               |
| Glyoxylate and dicarboxylate metabolism             | 1/32         | 1.18E-05 | 4.9283  | 2.01E-04  | 0       | Glutamate                                               |
| Butanoate metabolism                                | 1/15         | 1.18E-05 | 4.9283  | 2.01E-04  | 0       | Glutamate                                               |
| Porphyrin and chlorophyll metabolism                | 1/30         | 1.18E-05 | 4.9283  | 2.01E-04  | 0       | Glutamate                                               |
| Nitrogen metabolism                                 | 1/6          | 1.18E-05 | 4.9283  | 2.01E-04  | 0       | Glutamate                                               |
| Arginine and proline metabolism                     | 2/38         | 1.47E-05 | 4.8322  | 2.01E-04  | 0.1638  | Proline, Glutamate                                      |
| Alanine, aspartate and glutamate metabolism         | 2/28         | 1.97E-05 | 4.7064  | 2.01E-04  | 0.42068 | Aspartate, Glutamate                                    |
| Arginine biosynthesis                               | 2/14         | 1.97E-05 | 4.7064  | 2.01E-04  | 0.11675 | Aspartate, Glutamate                                    |
| Histidine metabolism                                | 2/16         | 1.97E-05 | 4.7064  | 2.01E-04  | 0       | Aspartate, Glutamate                                    |
| Aminoacyl-tRNA biosynthesis                         | 5/48         | 4.37E-05 | 4.3596  | 3.06E-04  | 0       | Phenylalanine, Aspartate, Threonine, Proline, Glutamate |
| Lysine degradation                                  | 1/25         | 1.17E-04 | 3.9327  | 7.01E-04  | 0       | Pipecolate                                              |
| beta-Alanine metabolism                             | 1/21         | 0.001542 | 2.8119  | 0.0077099 | 0       | Aspartate                                               |
| Nicotinate and nicotinamide metabolism              | 1/15         | 0.001542 | 2.8119  | 0.0077099 | 0       | Aspartate                                               |
| Pantothenate and CoA biosynthesis                   | 1/19         | 0.001542 | 2.8119  | 0.0077099 | 0       | Aspartate                                               |
| Phenylalanine, tyrosine and tryptophan biosynthesis | 1/4          | 0.082706 | 1.0825  | 0.16541   | 0.5     | Phenylalanine                                           |
| Phenylalanine metabolism                            | 1/10         | 0.082706 | 1.0825  | 0.16541   | 0.35714 | Phenylalanine                                           |
